1 **Univariable and multivariable Mendelian randomization study**  
2 **identified the key role of gut microbiota in immunotherapeutic**  
3 **toxicity**

4  
5 **Baike Liu<sup>1,2,5</sup>, Zheran Liu<sup>3,5</sup>, Tianxiang Jiang<sup>1,2,5</sup>, Xiangshuai Gu<sup>4</sup>, Xiaonan Yin<sup>1,2</sup>,**  
6 **Zhaolun Cai<sup>1,2</sup>, Xiaoqiao Zou<sup>1,2</sup>, Lei Dai<sup>4\*</sup>, Bo Zhang<sup>1,2\*</sup>**

7  
8 <sup>1</sup> Department of General Surgery, West China Hospital, Sichuan University, Chengdu,  
9 Sichuan, 610041, the People's Republic of China.

10 <sup>2</sup> Gastric Cancer Center, West China Hospital, Sichuan University. Chengdu, Sichuan,  
11 610041, the People's Republic of China.

12 <sup>3</sup> Department of Biotherapy and National Clinical Research Center for Geriatrics,  
13 Cancer Center, West China Hospital, Sichuan University, Chengdu, Sichuan, the  
14 People's Republic of China.

15 <sup>4</sup> State Key Laboratory of Biotherapy and Cancer Center, West China Hospital,  
16 Sichuan University and Collaborative Innovation Center for Biotherapy, Chengdu,  
17 Sichuan, 610041, the People's Republic of China.

18 <sup>5</sup> These authors contributed equally: Baike Liu, Zheran Liu, Tianxiang Jiang.

19 \*e-mail: [zhangbo\\_scu@scu.edu.cn](mailto:zhangbo_scu@scu.edu.cn), [daileisklb2012@163.com](mailto:daileisklb2012@163.com)

20  
21  
22 Running title: Causal associations between gut microbiota and irAEs

33 **Abstract:**

34 **Background:** In cancer patients receiving immune checkpoint inhibitors (ICIs), there  
35 is emerging evidence suggesting a correlation between gut microbiota and  
36 immune-related adverse events (irAEs). However, the exact roles of gut microbiota  
37 and the causal associations are yet to be clarified.

38 **Methods:** To investigate this, we first conducted a univariable bi-directional  
39 two-sample Mendelian randomization (MR) analysis. Instrumental variables (IVs) for  
40 gut microbiota were retrieved from the MiBioGen consortium (18,340 participants).  
41 GWAS summary data for irAEs were gathered from an ICIs-treated cohort with 1,751  
42 cancer patients. Various MR analysis methods, including Inverse variance weighted  
43 (IVW), MR PRESSO, maximum likelihood (ML), weighted median, weighted mode,  
44 and cML-MA-BIC were used. Furthermore, multivariable MR (MVMR) analysis was  
45 performed to account for possible influencing instrumental variables.

46 **Results:** Our analysis identified fourteen gut bacterial taxa that were causally  
47 associated with irAEs. Notably, *Lachnospiraceae* was strongly associated with an  
48 increased risk of both high-grade and all-grade irAEs, even after accounting for the  
49 effect of BMI in the MVMR analysis. *Akkermansia*, *Verrucomicrobiaceae*, and  
50 *Anaerostipes* were found to exert protective roles in high-grade irAEs. However,  
51 *Ruminiclostridium6*, *Coprococcus3*, *Collinsella*, and *Eubacterium (fissicatena group)*  
52 were associated with a higher risk of developing high-grade irAEs.  
53 *RuminococcaceaeUCG004*, and *DefluviitaleaceaeUCG011* were protective against  
54 all-grade irAEs, whereas *Porphyromonadaceae*, *Roseburia*, *Eubacterium (brachy*  
55 *group)*, and *Peptococcus* were associated with an increased risk of all-grade irAEs.

56 **Conclusion:** Our analysis highlights a strong causal association between  
57 *Lachnospiraceae* and irAEs, along with some other gut microbial taxa. These findings  
58 provide potential modifiable targets for managing irAEs and warrant further  
59 investigation.

60

61 **Key words:** Gut microbiota, Immunotherapy toxicity, Immune-related adverse effects,  
62 irAEs, *Lachnospiraceae*, *Akkermansia*, *Ruminiclostridium6*, Mendelian  
63 randomization study, multivariable Mendelian randomization study, MVMR

64

65

66

67

68

## 69 Introduction

70 Applications of immune checkpoint inhibitors (ICIs), especially those targeting  
71 CTLA-4 and PD-1/PD-L1, have revolutionized the treatment of various aggressive  
72 cancers (1). By blocking inhibitory signaling pathways and reinvigorating the natural  
73 anti-tumor immune response, these inhibitors have significantly prolonged the lives of  
74 numerous cancer patients (2–5). However, due to the inhibition of the systemic brake  
75 of immune activation, ICIs can cause off-target effects resulting in immune-mediated  
76 toxicities to organs and non-malignant tissues. This newly emerging registry of  
77 iatrogenic effects, known as immune-related adverse events (irAEs), usually resemble  
78 autoimmune disorders, such as colitis, dermatitis, and thyroiditis (6). Although the  
79 majority of irAEs manifest in a mild manner, still, up to 55% of patients develop  
80 serious irAEs in combined therapy (anti-CTLA-4 and anti-PD-1) (7). Notably, serious  
81 irAEs pose significant risks to patients' well-being and may result in morbidity and  
82 mortality, not only due to the adverse event itself but also due to the need to suspend  
83 or terminate ICIs therapy and the potential impairment of the ICIs-induced immune  
84 response while using immunosuppressants (e.g. corticosteroids) (8–10). Therefore,  
85 effective management of irAEs is critical to optimize the safety and efficacy of ICIs  
86 therapy.

87 The precise mechanisms underlying irAEs are not fully understood, but  
88 emerging evidence indicates that the gut microbiota, a complex and dynamic system  
89 of microorganisms colonizing the intestinal tract, may play a crucial role in the  
90 regulation of irAEs. Simpson et al. found a reduced alpha-diversity of intestinal  
91 microbiota in patients who developed severe irAEs (11). Furthermore, antibiotics  
92 commonly prescribed prophylactically to hospitalized patients have been shown to  
93 increase the risk of ICIs therapy-related irAEs that are not limited to the  
94 gastrointestinal tract (12–14). The gut microbiota closely interacts with the host  
95 immune system and has been implicated in the regulation of various autoimmune and  
96 inflammatory disorders (15,16). However, consensus on the core microbial drivers or  
97 protective microbes of irAEs is still lacking, due to inconsistent findings reported in  
98 previous studies (11,17–19). The discrepancies among previous studies may be  
99 attributed to limited sample sizes and susceptibility to confounding factors such as age,  
100 diet, and medication usage in observational designs (11,20).

101 Mendelian randomization (MR), initially described by Katan in 1986 (21), is a  
102 novel method for inferring causal associations between modifiable risk factors and  
103 health outcomes using genetic variations as instrumental variables (IVs) (22). MR  
104 effectively addresses the limitations of confounding and measurement errors that  
105 often exist in observational studies, as the direction of causation is from the genetic  
106 polymorphism to the trait of interest, not vice versa (23). Therefore, we aim to utilize

107 MR, an increasingly popular method in drug discovery and epidemiology (24,25), to  
108 investigate the potential association between the gut microbiota and irAEs, providing  
109 further evidence for the management of irAEs by manipulating human gut microbiota.  
110

## 111 **2. Methods**

### 112 **Study design and data source**

113 An overview of the study design was illustrated in **Figure 1**. In general, we first  
114 performed univariable bi-directional two-sample MR analysis, which utilizes single  
115 nucleotide polymorphisms (SNPs) from summary-level data as proxies for the risk  
116 factor under investigation. Then, several sensitivity analyses and multivariable MR  
117 analysis (MVMR) was conducted to further increase the robustness of our study. To  
118 ensure the validity of the MR results, three assumptions needed to be satisfied, as  
119 illustrated in **Figure S1** (22):

120 (1) **Relevance assumption:** The genetic variants should demonstrate a strong  
121 association with the exposure;

122 (2) **Independence assumption:** The genetic variants should not be associated  
123 with any confounders that could affect the relationship between the exposure and  
124 outcome;

125 (3) **Exclusion restriction assumption:** The genetic variants should not have an  
126 independent effect on the outcome aside from their impact through the exposure.

127 This study is based on publicly available GWAS summary statistics and ethical  
128 approvals were acquired by the original studies.

129

130 **Gut microbiota:** Genetic variations associated with the composition of gut  
131 microbiota were derived from the most comprehensive genome-wide meta-analysis  
132 conducted to date by the MiBioGen consortium (26). This study included a total of  
133 18,340 individuals from 24 cohorts worldwide, mainly of European descent ( $n =$   
134 13,266). Fecal DNA was extracted, and targeted sequencing of variable regions in the  
135 bacterial 16S rRNA gene (V4, V3-V4, and V1-V2 regions) was performed to profile  
136 the gut bacterial composition. To account for sequencing depth differences across  
137 cohorts, all cohorts were rarefied to 10,000 reads per sample. Taxonomic  
138 classification was performed using direct taxonomic binning method (26). Following  
139 quality control, imputation, and post-imputation filtering procedures, gut bacterial  
140 taxa observed in over 10% of samples were included in the microbiota quantitative  
141 trait loci (mbQTL) mapping (26). This allowed us to identify host genetic variants  
142 associated with the relative abundance of bacterial taxa. Further details on microbial  
143 data processing can be found in the original study. Genus-level and family-level taxa  
144 were included in our analysis, resulting in a total of 131 genus-level and 35

145 family-level taxa.

146

147 **irAEs:** Summary-level data of irAEs was obtained from a recent GWAS  
148 conducted in the Dana-Farber Cancer Institute (DFCI) cohort (27). The study included  
149 1,751 cancer patients of European ancestry who underwent ICIs treatments between  
150 2013 and 2020. The majority of patients (approximately 90%) received PD-1/PD-L1  
151 inhibitors, while the remaining 10% received combined immunotherapy (CTLA4 and  
152 PD-1/PD-L1 inhibitors). Among the 1,751 cancer patients, 259 cases that experienced  
153 high-grade irAEs (grade 3 to 5 events) were manually curated according to the  
154 National Cancer Institute (NCI) Common Terminology Criteria for Adverse Events  
155 v.5 guidelines. Additionally, algorithm-based autoimmune-like electronic health  
156 records were used to identify 339 patients who experienced any grade irAEs (referred  
157 to as all-grade irAEs). Most of these cases were grade 2 or higher events (27). The  
158 tumor tissue of these patients was sequenced using the targeted OncoPanel  
159 sequencing platform. After quality control steps, germline SNPs were imputed by  
160 utilizing ultra-low-coverage off-target reads. Then, the GWAS was conducted in the  
161 DFCI cohort to investigate the association of all variants with the time from the start  
162 of ICIs treatment to the occurrence of the two phenotypes of irAEs. For more detailed  
163 information, please refer to the original publication (27).

164

#### 165 **Selection of instrumental variables**

166 Several steps were followed in the selection of iVs. Firstly, for the gut  
167 microbiome, we selected SNPs associated with bacterial taxa with a p-value less than  
168  $1 \times 10^{-5}$  for further analysis (28,29). Secondly, potential SNPs were clumped for  
169 independence in the TwoSampleMR package in R software. We used the European  
170 1000 Genomes Project Phase 3 reference panel and set the linkage-disequilibrium  
171 threshold ( $r^2$ ) at 0.001 within a 10 Mb window size. Thirdly, we extracted SNPs from  
172 the outcome statistics and performed a harmonization procedure. SNPs that were not  
173 available in the outcome GWAS data were replaced with proxy SNPs ( $r^2 > 0.8$ ), and  
174 palindromic SNPs were removed for further MR analysis. Furthermore, F statistics of  
175 selected iVs, which indicate instrument strength, was calculated as  $[\text{Beta}/\text{SE}]^2$ .  
176 Typically, F statistics  $> 10$  suggest enough iVs strength to avoid weak instrument bias  
177 (30). Finally, All SNPs with positive results were re-examined using PhenoScanner  
178 package (version 1.0) in R software to investigate the presence of potential  
179 confounders. Bacterial taxa with less than 3 valid SNPs and unknown origin were  
180 excluded from the analysis to mitigate potential bias. Consequently, we included a  
181 total of 104 genus-level and 28 family-level bacterial taxa ( $n = 132$ ) for further MR  
182 analysis.

183

## 184 **Statistical analysis**

185 In this study, we employed several MR analysis methods to explore the potential  
186 causal relationship between gut microbiota and irAEs. The methods used included  
187 IVW, MR PRESSO, ML, weighted median, weighted mode, and a constrained  
188 maximum likelihood and model averaging based method (cML-MA-BIC). IVW and  
189 MR PRESSO were used in the primary analysis. In general, IVW provides maximum  
190 statistical power when all instruments are valid (31), while MR PRESSO identifies  
191 and removes genetic variants that deviate significantly from the variant-specific  
192 causal estimates of other variants, thereby increasing statistical power and addressing  
193 potential outliers (32). The ML method resembles the IVW approach which assumes  
194 the absence of both heterogeneity and horizontal pleiotropy. If these assumptions hold  
195 true, the ML method yields unbiased results with smaller standard errors compared to  
196 the IVW approach (33). Considering the potential existence of IV pleiotropy, we also  
197 performed pleiotropy-robust methods including weighted median, weighted mode,  
198 and cML-MA-BIC in the sensitivity analysis. These methods relax the instrumental  
199 variable assumptions. Weighted median were introduced when the exclusion  
200 restriction assumption was violated (uncorrelated pleiotropy), which typically assume  
201 fewer than 50% of genetic variants are invalid (34). The weighted-mode method  
202 clusters genetic variants based on their similarity in causal effect and estimates the  
203 overall causal effect based on the cluster with the most number of iVs (35). The  
204 cML-MA-BIC method is a novel approach developed for MR analysis, specifically  
205 addressing the issue of invalid iVs exhibiting both uncorrelated and correlated  
206 pleiotropy (violation of the independence assumption) (36). By being robust to such  
207 violations, cML-MA-BIC improves the accuracy of MR analysis, reduces Type I error,  
208 and increases statistical power (36).

209 Next, heterogeneity and directional pleiotropy were assessed using Cochra's Q  
210 statistics and MR Egger intercept. Leave-one-out (LOO) analysis was conducted to  
211 identify possible reliance on a specific variant, which involved excluding one SNP at  
212 a time for all valid SNPs in the IVW analysis. Additionally, reverse MR analysis  
213 between irAEs and the identified significant gut bacterial taxa was performed.  
214 Moreover, MVMR analysis, which could help us better understand the intricate  
215 interplay between the risk factors was further conducted (37). We considered a  
216 Bonferroni-corrected p-value of  $3.89 \times 10^{-4}$  (0.05/132) as the significance threshold  
217 for gut microbiota. Two-tailed p-value  $< 0.05$  was considered suggestive of  
218 significance. All analyses were conducted using R packages "TwoSampleMR"  
219 (version 0.5.6), "MRPRESSO" (version 1.0), and "MRcML" (version 0.0.0.9) in R  
220 software (version 4.2.2).



221

## 222 **3. Results**

### 223 **3.1 Genetic instruments and primary MR analysis**

224 A total of 870 single nucleotide polymorphisms (SNPs) were selected as  
225 instrumental variables (iVs) for the 132 gut bacterial taxa (**Table S1**). The F statistics  
226 for each SNP ranged from 16.91 to 36.57, with a median value of 21.66. Using the  
227 IVW and MR-PRESSO methods, eight gut bacterial taxa associated with high-grade  
228 irAEs were identified with p-values < 0.05. These taxa include *Lachnospiraceae*,  
229 *Verrucomicrobiaceae*, *Ruminiclostridium6*, *Coprococcus3*, *Anaerostipes*,  
230 *Akkermansia*, *Collinsella*, and *Eubacterium (fissicatena group)*. For all-grade irAEs,  
231 seven gut bacterial taxa, including *Lachnospiraceae*, *Porphyromonadaceae*,  
232 *Roseburia*, *RuminococcaceaeUCG004*, *DefluviitaleaceaeUCG011*, *Eubacterium*  
233 (*brachy group*), and *Peptococcus*, were identified. Given previous studies suggest that  
234 pre-existing autoimmune conditions such as inflammatory bowel disease, psoriasis,  
235 and rheumatoid arthritis may predispose individuals to irAEs susceptibility (38,39).  
236 We further examined the SNPs associated with the significant bacterial taxa using  
237 PhenoScanner. Only one SNP (rs11597285) for the *Collinsella* genus was found to be  
238 associated with allergic disease (e.g. allergic rhinitis and eczema) (refer to **Table S9**).  
239 However, the results of *Collinsella* remained uninfluenced after removing rs11597285  
240 in the LOO analysis (described below). The complete results of the primary MR  
241 analysis can be found in **Table S2** and **Table S3**.

242

### 243 **3.2 Main MR results and sensitivity analysis for high-grade irAEs**

244 As shown in **Figure 2**, the IVW estimate suggested the abundance of  
245 *Lachnospiraceae* family was associated with a shortened time to high-grade irAEs  
246 (Beta = -1.22, 95% CI: -1.99 to -0.44, p =  $2.17 \times 10^{-3}$ ), indicating *Lachnospiraceae*  
247 serves as a risk factor for the development of high-grade irAEs. The deleterious effect  
248 remained significant in pleiotropy-robust cML-MA-BIC estimation (Beta = -1.24, 95%  
249 CI: -2.45 to -0.02, p =  $4.62 \times 10^{-2}$ ). Surprisingly, *Ruminiclostridium6* genus was  
250 significantly associated with an increased risk of high-grade irAEs in all MR  
251 approaches, including IVW (Beta = -2.11, 95% CI: -2.98 to -1.23, p =  $2.47 \times 10^{-6}$ ),  
252 cML-MA-BIC (Beta = -2.17, 95% CI: -3.49 to -0.86, p =  $1.19 \times 10^{-3}$ ), Weighted  
253 median (Beta = -2.43, 95% CI: -4.05 to -0.81, p =  $3.29 \times 10^{-3}$ ), and other methods. In  
254 addition, the IVW estimate indicated a protective effect of the *Akkermansia* genus on  
255 high-grade irAEs (Beta = 1.27, 95% CI: 0.28 to 2.25, p = 0.01), and this finding was  
256 confirmed by the IVW estimate of its paternal taxon *Verrucomicrobiaceae* (Beta =  
257 1.27, 95% CI: 0.29 to 2.25, p = 0.01). The IVW estimate of *Anaerostipes* genus also  
258 indicated a suggestive protective effect against high-grade irAEs (Beta = 2.1, 95% CI:

259 0.85 to 3.35,  $p = 1.02 \times 10^{-3}$ ), as well as cML-MA-BIC (Beta = 2.17, 95% CI: 0.57 to  
260 3.77,  $p = 7.88 \times 10^{-3}$ ). Moreover, significant effects of the *Coprococcus3* (Beta =  
261 -2.04, 95% CI: -2.7 to -1.39,  $p = 8.93 \times 10^{-10}$ ), *Collinsella* (Beta = -1.12, 95% CI: -1.7  
262 to -0.53,  $p = 1.7 \times 10^{-4}$ ), and *Eubacterium (fissicatena group)* genus (Beta = -0.73, 95%  
263 CI: -1.01 to -0.46,  $p = 1.93 \times 10^{-7}$ ) were all revealed by IVW estimate, indicating an  
264 increased risk of high-grade irAEs. Scatter plots reflecting the effect size of iVs on  
265 both bacterial taxa and high-grade irAEs are shown in **Figure 4**.

266 In the subsequent analysis of heterogeneity and horizontal pleiotropy, Cochran's  
267 Q statistics revealed no significant heterogeneity ( $p$ -value > 0.05) among the iVs for  
268 the gut bacterial taxa in high-grade irAEs analysis (see **Table 1**). No significant  
269 evidence for directional horizontal pleiotropy was found in the MR-Egger regression  
270 intercept analysis and MR PRESSO global test (**Table 1 and Table S4**). Additionally,  
271 the LOO analysis identified no predominant SNP that influenced the results (**Figure**  
272 **6**). We further performed reverse MR analysis and demonstrated no reverse causation  
273 exists between high-grade irAEs and the abundance of gut bacterial taxa (**Table S6**).  
274

### 275 **3.3 Main MR results and sensitivity analysis for all-grade irAEs**

276 **Figure 3** reveals the association between bacterial taxa and all-grade irAEs. It is  
277 noteworthy that the deleterious impact of the *Lachnospiraceae* family was also  
278 detected in all-grade irAEs, as revealed by IVW (Beta = -2.05, 95% CI: -3.27 to -0.82,  
279  $p = 1.06 \times 10^{-3}$ ), cML-MA-BIC (Beta = -2.21, 95% CI: -3.32 to -1.1,  $p = 9.16 \times 10^{-5}$ ),  
280 and Weighted median estimates (Beta = -1.72, 95% CI: -3.2 to -0.24,  $p = 2.25 \times 10^{-2}$ ).  
281 The IVW estimate of *Roseburia* genus also showed an increased risk of all-grade  
282 irAEs (Beta = -2.07, 95% CI: -3.21 to -0.93,  $p = 3.76 \times 10^{-4}$ ). Consistent results were  
283 observed in ML (Beta = -2.07, 95% CI: -3.67 to -0.47,  $p = 1.14 \times 10^{-2}$ ) and  
284 cML-MA-BIC (Beta = -2.08, 95% CI: -3.71 to -0.45,  $p = 1.23 \times 10^{-2}$ ) estimates. On  
285 the contrary, *RuminococcaceaeUCG004* (Beta = 1.07, 95% CI: 0.43 to 1.72,  $p = 1.05$   
286  $\times 10^{-3}$ ) and *DefluviitaleaceaeUCG011* (Beta = 0.82, 95% CI: 0.38 to 1.25,  $p = 2.15 \times$   
287  $10^{-4}$ ) were identified to decrease the risk of all-grade irAEs according to the IVW  
288 approach. Subsequently, the results for *RuminococcaceaeUCG004* were consistent  
289 with the cML-MA-BIC (Beta = 1.1, 95% CI: 0.04 to 2.15,  $p = 4.12 \times 10^{-2}$ ) and ML  
290 method (Beta = 1.09, 95% CI: 0.04 to 2.14,  $p = 4.16 \times 10^{-2}$ ). Moreover, the IVW  
291 estimates suggested that *Porphyromonadaceae* (Beta = -1.11, 95% CI: -1.83 to -0.39,  
292  $p = 2.46 \times 10^{-3}$ ), *Eubacterium (brachy group)* (Beta = -0.71, 95% CI: -1.14 to -0.27,  $p$   
293  $= 1.38 \times 10^{-3}$ ), and *Peptococcus* (Beta = -0.71, 95% CI: -1.24 to -0.18,  $p = 8.82 \times 10^{-3}$ )  
294 may increase the risk of all-grade irAEs. Scatter plots reflecting the effect size of each  
295 IV on both bacterial taxa and all-grade irAEs are shown in **Figure 5**.

296 Similarly, Cochran's Q statistics indicated an absence of notable heterogeneity in  
297 the iVs of gut bacterial taxa (refer to **Table 1**). In addition, the results from the



298 MR-Egger regression intercept analysis and the MR PRESSO global test  
299 demonstrated no significant evidence of directional horizontal pleiotropy (**Table 1**  
300 **and Table S4**). Next, no significant single SNP was identified in the LOO analysis  
301 that influenced the results (**Figure 7**). Overall, these results provide evidence for the  
302 association between specific gut bacterial taxa and the development of high-grade and  
303 all-grade irAEs, and highlight the potential role of the gut microbiota in irAEs.

304

### 305 **3.4 Multivariable MR analysis**

306 Given the strong correlation between body mass index (BMI) and gut microbiota  
307 (40,41), we incorporated BMI and weight-associated anthropometric traits, as well as  
308 several lifestyle risk factors associated with irAEs (42), into the univariable MR  
309 analysis. Detailed GWAS datasets information of these anthropometric traits and  
310 lifestyle risk factors can be found in **Table S10**. The univariable MR analysis  
311 suggested a correlation between BMI and an increased risk of all-grade irAEs (**Table**  
312 **2**). Thus, we performed subsequent MVMR analysis by including BMI as an  
313 additional exposure alongside previously identified gut microbial taxa (**Table S11**).  
314 Notably, after accounting for the effect of BMI in the MVMR analysis,  
315 *Lachnospiraceae* still remained significantly associated with the risk of developing  
316 all-grade irAEs (Beta = -1.07, 95% CI: -1.96 to -0.18, p = 0.02), and high-grade irAEs  
317 (Beta = -0.91, 95% CI: -1.84 to 0.01, p = 0.05) with a marginal p value (**Table 3**).

318

## 319 **4. Discussion**

320 In this study, univariable bi-directional MR and MVMR analyses were  
321 conducted to infer the causal association between gut microbiota and irAEs. We  
322 identified fourteen gut bacterial taxa that were causally associated with high-grade  
323 and all-grade irAEs. Surprisingly, *Lachnospiraceae* strong associated with an  
324 increased risk of both irAEs phenotypes, even after accounting for the effect of BMI  
325 in the MVMR analysis. Additionally, we found robust evidence indicating that  
326 *Ruminiclostridium6* predisposes ICIs receivers to developing high-grade irAEs.  
327 *Coprococcus3*, *Collinsella*, and *Eubacterium (fissicatena group)* were also associated  
328 with an increased risk of high-grade irAEs, while *Akkermansia*, *Verrucomicrobiaceae*,  
329 and *Anaerostipes* exhibited protective roles in high-grade irAEs. For all-grade irAEs,  
330 *Porphyromonadaceae*, *Roseburia*, *Eubacterium (brachy group)*, and *Peptococcus*  
331 were associated with an elevated risk, while *RuminococcaceaeUCG004* and  
332 *DefluviitaleaceaeUCG011* were associated with a reduced risk.

333 Several observational studies have demonstrated associations between gut  
334 microbiota and irAEs (11,17–19,43,44). *Lachnospiraceae* species (such as

335 *Coprococcus* and *Roseburia*), which are obligately anaerobic, variably spore-forming  
336 bacteria, were found to correlate with increased risk of various types of irAEs  
337 (17,18,45). In a more recent study, two species of the *Lachnospiraceae* family were  
338 specifically enriched in irAEs that occur in endocrine organs (46). Consistent with  
339 these findings, we also identified the *Lachnospiraceae* family, and its two genera (i.e.,  
340 *Coprococcus* and *Roseburia*) associated with an increased risk of irAEs. Importantly,  
341 the harmful influence of the *Lachnospiraceae* family was observed in high-grade  
342 irAEs and all-grade irAEs, even after adjusting the effect of BMI, which provides  
343 further validity and robustness to our study. *Ruminiclostridium* has been less studied  
344 in irAEs, but some studies have observed its accumulation in a mouse model of  
345 DSS-induced colitis. While treated with phloretin (a dihydrochalcone flavonoid) or  
346 sodium butyrate (one of the short chain fatty acids [SCFAs]), both of which alleviates  
347 DSS-induced colitis, the abundance of *Ruminiclostridium* was reduced (47,48). In  
348 addition, the *Ruminiclostridium* genus has also been associated with  
349 autoimmune-related diseases, such as the experimental multiple sclerosis model and  
350 Alzheimer's disease (49,50). Based on our strong association of *Ruminiclostridium*  
351 with increased risk of high-grade irAEs, it is suggested that *Ruminiclostridium* may  
352 play a pivotal role in the development of autoimmune conditions and could be a  
353 potential target for relieving irAEs symptoms, although more evidence is needed.

354 *Akkermansia muciniphila*, an anaerobic gram-negative species that belongs to  
355 *Akkermansia* genus, and *Verrucomicrobiaceae* family, has gained much attention in  
356 immunotherapy due to their association with a favorable response in ICIs therapy  
357 (51–53). *Akkermansia muciniphila* has also been shown to exhibit a protective role in  
358 ICIs-associated colitis (54). Mechanically, Wang et al. demonstrated that *Akkermansia*  
359 *muciniphila* and its purified membrane protein mitigated colitis by regulating  
360 macrophages and CD8+ T cells in the colon tissue (55). Our study further supported  
361 the protective role of *Akkermansia* in high-grade irAEs. *Ruminococcaceae*, a key  
362 family of bacteria producing short-chain fatty acids (SCFAs), has been observed to be  
363 enriched in ICIs responders without severe irAEs (11). Previous studies have found  
364 that *Faecalibacterium prausnitzii*, a species belonging to the *Ruminococcaceae* family,  
365 was decreased in non-responders and those experiencing severe irAEs (11,17,45).  
366 These findings suggest a potential role of *Ruminococcaceae* as protective bacteria,  
367 possibly through the facilitation of SCFAs accumulation, in the mitigation of irAEs.  
368 *Collinsella* and *Anaerostipes* have limited evidence in irAEs, but the *Collinsella*  
369 genus has been reported to increase the production of IL-17A and enhance rheumatoid  
370 arthritis severity (56). In contrast, *Anaerostipes*, which belongs to the  
371 *Lachnospiraceae* family, was conversely associated with the risk of high-grade irAEs  
372 in our study (11,18). These discrepancies observed in previous clinical studies might  
373 be attributed to several factors, including limited sample sizes in previous

374 observational studies, heterogeneity among the samples, and inadequate exploration  
375 of the taxonomic classification at the genus level of the gut microbiota. Therefore, a  
376 more detailed taxonomy for gut microbiota is crucial in dissecting the underlying  
377 mechanisms.

378 Gut microbiota plays a pivotal role in modulating human immune homeostasis,  
379 and an imbalance in gut microbial composition, known as gut dysbiosis, has been  
380 implicated in several autoimmune diseases (15,16,57). IrAEs resemble autoimmune  
381 diseases in many aspects (38,58,59). Thus, despite the underlying mechanisms by  
382 which gut microbiota manipulates the development of irAEs remain poorly  
383 understood, we hypothesize that there might be some shared etiology of microbiota in  
384 autoimmune diseases and irAEs. These mechanisms include: (1) “Molecular  
385 mimicry”: Evidence has shown that exposure to homologous amino acid sequences or  
386 epitopes of microbiota and aberrant activation of autoreactive B or T cells leads to  
387 multiple autoimmune diseases, such as multiple sclerosis (60), Guillain–Barré  
388 syndrome (61), Type 1 diabetes (62), Rheumatoid arthritis (63), and primary biliary  
389 cholangitis (64), which is referred to as “molecular mimicry” (65). It is believed that  
390 the systematic activation of the immune system during ICIs treatment triggers irAEs  
391 by bypassing self-tolerance in normal organs. One intriguing fact is that most irAEs  
392 occur in barrier organs (e.g., the intestinal tract, skin, and lungs) (58,66). This implies  
393 that the activated immune response might target the commensal microbiome as  
394 antigenic targets, although this hypothesis has not been fully demonstrated. (2)  
395 Decreased accumulation of SCFAs: SCFAs, including acetate, propionate, and  
396 butyrate, are a group of organic compounds primarily produced by the gut microbiota  
397 during the fermentation of dietary fibers. These metabolites were shown to improve  
398 the anti-cancer function of effector T cells, but they also seem to exhibit  
399 anti-inflammatory characteristics (67,68). Butyrate, one of the well-studied SCFAs,  
400 was shown to inhibit the activation of NF- $\kappa$ B and its downstream pathway (69),  
401 thereby reducing the production of pro-inflammatory cytokines such as IL-8 (70),  
402 while increasing the levels of anti-inflammatory factors like IL-10 (71). Moreover,  
403 SCFAs serve as a key energy source for colonocytes and maintain intestinal barrier  
404 integrity (72). Thus, the reduced abundance of SCFAs-producing bacteria along with  
405 its metabolites may participate in the development of irAEs. (3) Other mechanisms:  
406 Stimulation of the immune response by microbial-associated molecular patterns (e.g.,  
407 include lipopolysaccharides (LPS), lipoproteins, flagellin and bacterial DNA) (73)  
408 and compromised vitamin B and polyamine metabolism that associated with gut  
409 dysbiosis (19) may also contribute to irAEs.

410 Taken together, the gut microbiota and the human immune system maintain a  
411 delicate balance under normal physiological conditions. Once the balance has been  
412 disturbed (e.g., ICIs treatment), the dysregulated microbiota might lead to the

413 development of undesirable irAEs. The primary management strategy for irAEs (>  
414 grade 2) involves the suspension of ICIs and/or utilizing immunosuppressive therapy  
415 (74). Nevertheless, one concern is that discontinuing ICIs or using  
416 immunosuppressants may compromise treatment efficacy. Ideally, approaches to  
417 boost ICIs efficacy while reducing the accompanied irAEs are to be expected in the  
418 future. FMT, an approach to modulate gut microbiota, has been shown to increase  
419 ICIs efficacy in melanoma patients (75,76), and emerging evidence has demonstrated  
420 the mitigation of ICIs-related colitis through FMT in clinical practice (77).  
421 Interestingly, while irAEs and ICIs efficacy are often considered two sides of the  
422 same coin, certain gut bacteria, such as *Akkermansia muciniphila* and  
423 *Faecalibacterium prausnitzii*, have been shown to ameliorate irAEs and reinforce  
424 ICIs efficacy at the same time (78). This suggests that targeting gut microbiota could  
425 be an ideal approach to relieve irAEs symptoms and maintain ICIs efficacy, but  
426 further real-world evidence is needed to support this hypothesis.

427 Our study possesses several strengths. Firstly, we applied the MR approach to  
428 infer the causal associations between gut microbiota and irAEs, which effectively  
429 mitigates the influence of confounding factors and provides robust causal inference.  
430 Secondly, we conducted reverse MR analyses, confirming the absence of reverse  
431 causation, thereby enhancing the validity of our study. Thirdly, we applied MVMR in  
432 our analysis which further strengthened the validity and robustness of our study.  
433 Moreover, we incorporated several pleiotropy-robust methods such as MR PRESSO  
434 and cML-MA-BIC, further strengthening the robustness of our study. However, there  
435 are also certain inherent limitations in our study that should be considered when  
436 interpreting the findings. Firstly, our analysis is based on European-derived GWAS  
437 summary statistics, which might confine the generalization of the findings to other  
438 populations. Secondly, due to the utilization of summary statistics instead of raw data  
439 in the analysis, subgroup analyses based on ICIs regimes (e.g. PD-1/PD-L1 group,  
440 CTLA-4 group, and combined therapy group) could not be performed. Thirdly, the gut  
441 microbiota is shaped by multiple environmental factors, which confines the number of  
442 the identified significant gene loci in the GWAS (26). Thus, we relaxed the significant  
443 threshold of iVs to  $1 \times 10^{-5}$  (29) and employed Bonferroni correction to mitigate  
444 potential false positive results.

445

## 446 **5. Conclusion**

447 In conclusion, our univariable and multivariable MR analysis identified a strong  
448 causal association between *Lachnospiraceae* and irAEs, along with several other gut  
449 microbial taxa, such as *Akkermansia* and *Ruminiclostridium6* etc.. However, whether  
450 the FMT or probiotics could be used as interventional approaches to mitigate irAEs

451 while reserving ICIs efficacy, additional randomized clinical trials (RCTs) are  
452 warranted. Furthermore, in-depth investigations are needed to elucidate the precise  
453 mechanisms through which the gut microbiota influences the development of irAEs.

454

## 455 **Declarations**

### 456 **Acknowledgment:**

457 We acknowledge all the investigators who have made their GWAS data available.

458

### 459 **Author contributions**

460 B. L. conceptualized this study. B. L., Z. L., and T. J. were involved in the analyses  
461 and manuscript drafting of this study. X. G. and X. Z. were involved in the data  
462 curation. B. L., T. J. X. Y., Z. C., and L. D. were involved in the interpretation of the  
463 methodology and results. B. L. and Z. L. were involved in the visualization of the  
464 results. B. Z. was involved in obtaining funding and critical revision of the  
465 manuscript.

466

### 467 **Funding:**

468 This study was supported by the National Nature Science Foundations of China  
469 (Grant number 82203108), China Postdoctoral Science Foundation (Grant number  
470 2022M722275), and the Key R&D Program of Sichuan Province, China (Grant  
471 number 2023YFS0278).

472

### 473 **Conflict of Interest:**

474 All authors declare no conflict of interest.

475

### 476 **Data Availability:**

477 This study was conducted using public-available data. The GWAS summary statistics  
478 for gut microbiota are available at [www.mibiogen.org](http://www.mibiogen.org), and GWAS summary statistics  
479 for irAEs are available at <https://zenodo.org/record/6800429>.

480

481

## 482 **Supplementary Information**

483 **Table S1.** All Instrumental variables used for gut microbiota in the MR analysis.

484 **Table S2.** Full results of primary MR analysis between bacterial taxa and all-grade  
485 irAEs.

486 **Table S3.** Full results of primary MR analysis between bacterial taxa and high-grade  
487 irAEs.

488 **Table S4.** Results of MR PRESS Global test.

489 **Table S5.** Instrumental variables for irAEs in the reverse MR analysis.

490 **Table S6.** Results of reverse MR analysis between all-grade irAEs and the identified  
491 significant gut bacterial taxa.

492 **Table S7.** Results of reverse MR analysis between high-grade irAEs and the identified  
493 significant gut bacterial taxa.

494 **Table S8.** Results of heterogeneity and horizontal pleiotropy analysis in reverse MR  
495 analysis.

496 **Table S9.** PhenoScanner results of instrumental variables used for significant bacterial  
497 taxa in the MR analysis.

498 **Table S10.** Description of datasets used for weight-associated anthropometric and  
499 lifestyle factors in univariable MR analysis.

500 **Table S11.** Multivariate MR estimates between gut microbiota (adjusted for BMI) and  
501 irAEs.

502

503



**Table 1. Results of heterogeneity and horizontal pleiotropy analysis.**

| bacterial taxa (exposure)              | irAEs (outcome)  | Heterogeneity test |    |         | Horizontal pleiotropy results |      |         |
|----------------------------------------|------------------|--------------------|----|---------|-------------------------------|------|---------|
|                                        |                  | Cochran's Q        | df | p-value | Egger intercept               | SE   | p-value |
| <i>Lachnospiraceae</i>                 | High-grade irAEs | 5.18               | 12 | 0.95    | 0.04                          | 0.11 | 0.73    |
| <i>Verrucomicrobiaceae</i>             | High-grade irAEs | 4.18               | 7  | 0.76    | 0.36                          | 0.61 | 0.57    |
| <i>Eubacterium (fissicatena group)</i> | High-grade irAEs | 0.33               | 4  | 0.99    | 0.07                          | 0.53 | 0.9     |
| <i>Akkermansia</i>                     | High-grade irAEs | 4.18               | 7  | 0.76    | 0.37                          | 0.61 | 0.56    |
| <i>Anaerostipes</i>                    | High-grade irAEs | 4.13               | 6  | 0.66    | 0.38                          | 0.2  | 0.11    |
| <i>Collinsella</i>                     | High-grade irAEs | 0.82               | 6  | 0.99    | -0.19                         | 0.23 | 0.43    |
| <i>Coprococcus3</i>                    | High-grade irAEs | 0.47               | 4  | 0.98    | -0.28                         | 0.46 | 0.59    |
| <i>Ruminiclostridium6</i>              | High-grade irAEs | 3.54               | 7  | 0.83    | -0.17                         | 0.18 | 0.38    |
| <i>Lachnospiraceae</i>                 | All-grade irAEs  | 17.3               | 12 | 0.14    | 0.09                          | 0.11 | 0.43    |
| <i>Porphyromonadaceae</i>              | All-grade irAEs  | 0.66               | 4  | 0.96    | 0.05                          | 0.28 | 0.87    |
| <i>Eubacterium (brachy group)</i>      | All-grade irAEs  | 1.41               | 5  | 0.92    | -0.11                         | 0.29 | 0.73    |
| <i>DefluviitaleaceaeUCG011</i>         | All-grade irAEs  | 0.48               | 4  | 0.98    | -0.03                         | 0.25 | 0.92    |
| <i>Peptococcus</i>                     | All-grade irAEs  | 1.87               | 5  | 0.87    | -0.12                         | 0.24 | 0.66    |
| <i>Roseburia</i>                       | All-grade irAEs  | 3.75               | 7  | 0.81    | -0.31                         | 0.22 | 0.21    |
| <i>RuminococcaceaeUCG004</i>           | All-grade irAEs  | 2.73               | 7  | 0.91    | -0.23                         | 0.3  | 0.47    |

df, degree of freedom; SE, standard error.

504

505

**Table 2. Univariate MR estimates between common risk factors and irAEs.**

| Exposures                              | Method | NSNP | Outcomes            |         |                             |             |  |
|----------------------------------------|--------|------|---------------------|---------|-----------------------------|-------------|--|
|                                        |        |      | High-grade irAEs    |         | All-grade irAEs             |             |  |
|                                        |        |      | Beta (95%CI)        | p-value | Beta (95%CI)                | p-value     |  |
| <b>Anthropometric factors</b>          |        |      |                     |         |                             |             |  |
| BMI                                    | IVW    | 314  | -0.60 (-1.34, 0.14) | 0.11    | <b>-0.74 (-1.41, -0.06)</b> | <b>0.03</b> |  |
| Waist circumference                    | IVW    | 26   | 0.61 (-1.01, 2.23)  | 0.46    | 0.05 (-1.15, 1.24)          | 0.94        |  |
| Waist circumference (adjusted for BMI) | IVW    | 46   | 0.00 (-1.37, 1.38)  | 1.00    | -0.39 (-1.5, 0.73)          | 0.50        |  |
| Hip circumference                      | IVW    | 38   | 0.09 (-0.92, 1.10)  | 0.86    | -0.63 (-1.7, 0.44)          | 0.25        |  |
| Hip circumference (adjusted for BMI)   | IVW    | 52   | 0.65 (-0.38, 1.69)  | 0.21    | 0.47 (-0.52, 1.45)          | 0.35        |  |
| Waist-to-hip ratio                     | IVW    | 20   | -0.28 (-2.21, 1.64) | 0.77    | -1.69 (-3.56, 0.18)         | 0.08        |  |
| Waist-to-hip ratio (adjusted for BMI)  | IVW    | 25   | 0.84 (-0.88, 2.55)  | 0.34    | -0.54 (-1.94, 0.85)         | 0.44        |  |
| <b>Lifestyle factors</b>               |        |      |                     |         |                             |             |  |
| Alcoholic drinks per week              | IVW    | 14   | -0.44 (-4.21, 3.33) | 0.82    | -0.06 (-3.24, 3.12)         | 0.97        |  |
| Cigarettes smoked per day              | IVW    | 13   | 0.11 (-0.93, 1.16)  | 0.83    | 0.67 (-0.29, 1.63)          | 0.17        |  |
| Smoking initiation                     | IVW    | 54   | 0.08 (-1.21, 1.37)  | 0.90    | -0.10 (-1.23, 1.04)         | 0.87        |  |
| Type 2 diabetes                        | IVW    | 79   | -0.16 (-0.48, 0.17) | 0.34    | 0.01 (-0.33, 0.34)          | 0.97        |  |

BMI, body mass index; IVW, Inverse variance weighted method; NSNP, number of SNPs; irAEs, immune-related adverse events; 95%CI, 95% confidential interval.

509

**Table 3. Multivariable MR estimates between *Lachnospiraceae*, BMI and irAEs.**

| Exposures in MVMR      | Outcomes                   |             |                             |             |
|------------------------|----------------------------|-------------|-----------------------------|-------------|
|                        | High-grade irAEs           |             | All-grade irAEs             |             |
|                        | Beta (95%CI)               | p-value     | Beta (95%CI)                | p-value     |
| <i>Lachnospiraceae</i> | <b>-0.91 (-1.84, 0.01)</b> | <b>0.05</b> | <b>-1.07 (-1.96, -0.18)</b> | <b>0.02</b> |
| BMI                    | -0.43 (-1.2, 0.34)         | 0.28        | 0.01 (-0.33, 0.34)          | 0.34        |

MVMR, multivariable MR analysis; BMI, body mass index; irAEs, immune-related adverse events; 95%CI, 95% confidential interval.

510

511

512

513

514 **References:**

- 515 1. Ribas A, Wolchok JD. Cancer immunotherapy using checkpoint blockade.  
516 *Science*. 2018 Mar 23;359(6382):1350–5.
- 517 2. Hodi FS, O’Day SJ, McDermott DF, Weber RW, Sosman JA, Haanen JB, et al.  
518 Improved survival with ipilimumab in patients with metastatic melanoma. *N Engl J*  
519 *Med*. 2010 Aug 19;363(8):711–23.
- 520 3. Motzer RJ, Escudier B, McDermott DF, George S, Hammers HJ, Srinivas S, et al.  
521 Nivolumab versus Everolimus in Advanced Renal-Cell Carcinoma. *N Engl J Med*.  
522 2015 Nov 5;373(19):1803–13.
- 523 4. Mj O, R M, Ji L, S L, Hj L, Ma M, et al. Nivolumab in patients with metastatic  
524 DNA mismatch repair-deficient or microsatellite instability-high colorectal cancer  
525 (CheckMate 142): an open-label, multicentre, phase 2 study. *Lancet Oncol* [Internet].  
526 2017 Sep [cited 2023 Feb 17];18(9). Available from:  
527 <https://pubmed.ncbi.nlm.nih.gov/28734759/>
- 528 5. Gandhi L, Rodríguez-Abreu D, Gadgeel S, Esteban E, Felip E, De Angelis F, et  
529 al. Pembrolizumab plus Chemotherapy in Metastatic Non-Small-Cell Lung Cancer. *N*  
530 *Engl J Med*. 2018 May 31;378(22):2078–92.
- 531 6. Robert C. A decade of immune-checkpoint inhibitors in cancer therapy. *Nat*  
532 *Commun*. 2020 Jul 30;11(1):3801.
- 533 7. Postow MA, Chesney J, Pavlick AC, Robert C, Grossmann K, McDermott D, et  
534 al. Nivolumab and Ipilimumab versus Ipilimumab in Untreated Melanoma. *N Engl J*  
535 *Med*. 2015 May 21;372(21):2006–17.
- 536 8. Suresh K, Naidoo J. Lower Survival in Patients Who Develop Pneumonitis  
537 Following Immunotherapy for Lung Cancer. *Clin Lung Cancer*. 2020 May  
538 1;21(3):e169–70.
- 539 9. Schadendorf D, Wolchok JD, Hodi FS, Chiarion-Sileni V, Gonzalez R,  
540 Rutkowski P, et al. Efficacy and Safety Outcomes in Patients With Advanced  
541 Melanoma Who Discontinued Treatment With Nivolumab and Ipilimumab Because  
542 of Adverse Events: A Pooled Analysis of Randomized Phase II and III Trials. *J Clin*  
543 *Oncol Off J Am Soc Clin Oncol*. 2017 Dec 1;35(34):3807–14.
- 544 10. Brahmer JR, Lacchetti C, Schneider BJ, Atkins MB, Brassil KJ, Caterino JM, et  
545 al. Management of Immune-Related Adverse Events in Patients Treated With  
546 Immune Checkpoint Inhibitor Therapy: American Society of Clinical Oncology  
547 Clinical Practice Guideline. *J Clin Oncol Off J Am Soc Clin Oncol*. 2018 Jun  
548 10;36(17):1714–68.
- 549 11. Simpson RC, Shanahan ER, Batten M, Reijers ILM, Read M, Silva IP, et al.  
550 Diet-driven microbial ecology underpins associations between cancer immunotherapy  
551 outcomes and the gut microbiome. *Nat Med*. 2022 Nov;28(11):2344–52.
- 552 12. Jing Y, Chen X, Li K, Liu Y, Zhang Z, Chen Y, et al. Association of antibiotic  
553 treatment with immune-related adverse events in patients with cancer receiving  
554 immunotherapy. *J Immunother Cancer*. 2022 Jan;10(1):e003779.
- 555 13. Abu-Sbeih H, Herrera LN, Tang T, Altan M, Chaftari AP, Okhuysen PC, et al.

- 556 Impact of antibiotic therapy on the development and response to treatment of immune  
557 checkpoint inhibitor-mediated diarrhea and colitis. *J Immunother Cancer*. 2019 Sep  
558 5;7(1):242.
- 559 14. Mohiuddin JJ, Chu B, Facciabene A, Poirier K, Wang X, Doucette A, et al.  
560 Association of Antibiotic Exposure With Survival and Toxicity in Patients With  
561 Melanoma Receiving Immunotherapy. *J Natl Cancer Inst*. 2021 Feb 1;113(2):162–70.
- 562 15. Yoo JY, Groer M, Dutra SVO, Sarkar A, McSkimming DI. Gut Microbiota and  
563 Immune System Interactions. *Microorganisms*. 2020 Oct 15;8(10):1587.
- 564 16. Belkaid Y, Hand T. Role of the Microbiota in Immunity and inflammation. *Cell*.  
565 2014 Mar 27;157(1):121–41.
- 566 17. Chaput N, Lepage P, Coutzac C, Soularue E, Le Roux K, Monot C, et al.  
567 Baseline gut microbiota predicts clinical response and colitis in metastatic melanoma  
568 patients treated with ipilimumab. *Ann Oncol Off J Eur Soc Med Oncol*. 2017 Jun  
569 1;28(6):1368–79.
- 570 18. McCulloch JA, Davar D, Rodrigues RR, Badger JH, Fang JR, Cole AM, et al.  
571 Intestinal microbiota signatures of clinical response and immune-related adverse  
572 events in melanoma patients treated with anti-PD-1. *Nat Med*. 2022  
573 Mar;28(3):545–56.
- 574 19. Dubin K, Callahan MK, Ren B, Khanin R, Viale A, Ling L, et al. Intestinal  
575 microbiome analyses identify melanoma patients at risk for  
576 checkpoint-blockade-induced colitis. *Nat Commun*. 2016 Feb 2;7:10391.
- 577 20. Bajinka O, Tan Y, Abdelhalim KA, Özdemir G, Qiu X. Extrinsic factors  
578 influencing gut microbes, the immediate consequences and restoring eubiosis. *AMB*  
579 *Express*. 2020 Jul 25;10(1):130.
- 580 21. Katan MB. Apolipoprotein E isoforms, serum cholesterol, and cancer. *Lancet*  
581 *Lond Engl*. 1986 Mar 1;1(8479):507–8.
- 582 22. Davies NM, Holmes MV, Davey Smith G. Reading Mendelian randomisation  
583 studies: a guide, glossary, and checklist for clinicians. *BMJ*. 2018 Jul 12;362:k601.
- 584 23. Davey Smith G, Hemani G. Mendelian randomization: genetic anchors for causal  
585 inference in epidemiological studies. *Hum Mol Genet*. 2014 Sep 15;23(R1):R89–98.
- 586 24. Chen L, Peters JE, Prins B, Persyn E, Traylor M, Surendran P, et al. Systematic  
587 Mendelian randomization using the human plasma proteome to discover potential  
588 therapeutic targets for stroke. *Nat Commun*. 2022 Oct 17;13:6143.
- 589 25. Zhang X, Theodoratou E, Li X, Farrington SM, Law PJ, Broderick P, et al.  
590 Genetically predicted physical activity levels are associated with lower colorectal  
591 cancer risk: a Mendelian randomisation study. *Br J Cancer*. 2021 Mar;124(7):1330–8.
- 592 26. Kurilshikov A, Medina-Gomez C, Bacigalupe R, Radjabzadeh D, Wang J,  
593 Demirkan A, et al. Large-scale association analyses identify host factors influencing  
594 human gut microbiome composition. *Nat Genet*. 2021 Feb;53(2):156–65.
- 595 27. Groha S, Alaiwi SA, Xu W, Naranbhai V, Nassar AH, Bakouny Z, et al.  
596 Germline variants associated with toxicity to immune checkpoint blockade. *Nat Med*.  
597 2022 Dec;28(12):2584–91.
- 598 28. Liu X, Tong X, Zou Y, Lin X, Zhao H, Tian L, et al. Mendelian randomization  
599 analyses support causal relationships between blood metabolites and the gut

- 600 microbiome. *Nat Genet.* 2022 Jan;54(1):52–61.
- 601 29. Sanna S, van Zuydam NR, Mahajan A, Kurilshikov A, Vich Vila A, Vösa U, et al.  
602 Causal relationships among the gut microbiome, short-chain fatty acids and metabolic  
603 diseases. *Nat Genet.* 2019 Apr;51(4):600–5.
- 604 30. Zheng J, Baird D, Borges MC, Bowden J, Hemani G, Haycock P, et al. Recent  
605 Developments in Mendelian Randomization Studies. *Curr Epidemiol Rep.*  
606 2017;4(4):330–45.
- 607 31. Burgess S, Davey Smith G, Davies NM, Dudbridge F, Gill D, Glymour MM, et al.  
608 Guidelines for performing Mendelian randomization investigations. *Wellcome Open*  
609 *Res.* 2019;4:186.
- 610 32. Verbanck M, Chen CY, Neale B, Do R. Detection of widespread horizontal  
611 pleiotropy in causal relationships inferred from Mendelian randomization between  
612 complex traits and diseases. *Nat Genet.* 2018 May;50(5):693–8.
- 613 33. Burgess S, Dudbridge F, Thompson SG. Combining information on multiple  
614 instrumental variables in Mendelian randomization: comparison of allele score and  
615 summarized data methods. *Stat Med.* 2016 May 20;35(11):1880–906.
- 616 34. Bowden J, Davey Smith G, Haycock PC, Burgess S. Consistent Estimation in  
617 Mendelian Randomization with Some Invalid Instruments Using a Weighted Median  
618 Estimator. *Genet Epidemiol.* 2016 May;40(4):304–14.
- 619 35. Hartwig FP, Davey Smith G, Bowden J. Robust inference in summary data  
620 Mendelian randomization via the zero modal pleiotropy assumption. *Int J Epidemiol.*  
621 2017 Dec 1;46(6):1985–98.
- 622 36. Xue H, Shen X, Pan W. Constrained maximum likelihood-based Mendelian  
623 randomization robust to both correlated and uncorrelated pleiotropic effects. *Am J*  
624 *Hum Genet.* 2021 Jul 1;108(7):1251–69.
- 625 37. Sanderson E, Spiller W, Bowden J. Testing and correcting for weak and  
626 pleiotropic instruments in two-sample multivariable Mendelian randomization. *Stat*  
627 *Med.* 2021 Nov 10;40(25):5434–52.
- 628 38. Champiat S, Lambotte O, Barreau E, Belkhir R, Berdelou A, Carbonnel F, et al.  
629 Management of immune checkpoint blockade dysimmune toxicities: a collaborative  
630 position paper. *Ann Oncol Off J Eur Soc Med Oncol.* 2016 Apr;27(4):559–74.
- 631 39. Plaçais L, Dalle S, Dereure O, Trabelsi S, Dalac S, Legoupil D, et al. Risk of  
632 irAEs in patients with autoimmune diseases treated by immune checkpoint inhibitors  
633 for stage III or IV melanoma: results from a matched case–control study. *Ann Rheum*  
634 *Dis.* 2022 Oct 1;81(10):1445–52.
- 635 40. Stanislawski MA, Dabelea D, Lange LA, Wagner BD, Lozupone CA. Gut  
636 microbiota phenotypes of obesity. *NPJ Biofilms Microbiomes.* 2019;5(1):18.
- 637 41. Deng K, Shuai M, Zhang Z, Jiang Z, Fu Y, Shen L, et al. Temporal relationship  
638 among adiposity, gut microbiota, and insulin resistance in a longitudinal human  
639 cohort. *BMC Med.* 2022 May 19;20(1):171.
- 640 42. Chennamadhavuni A, Abushahin L, Jin N, Presley CJ, Manne A. Risk Factors  
641 and Biomarkers for Immune-Related Adverse Events: A Practical Guide to  
642 Identifying High-Risk Patients and Rechallenging Immune Checkpoint Inhibitors.  
643 *Front Immunol [Internet].* 2022 [cited 2023 Sep 12];13. Available from:



- 644 <https://www.frontiersin.org/articles/10.3389/fimmu.2022.779691>
- 645 43. Liu T, Xiong Q, Li L, Hu Y. Intestinal microbiota predicts lung cancer patients at  
646 risk of immune-related diarrhea. *Immunotherapy*. 2019 Apr;11(5):385–96.
- 647 44. Chau J, Yadav M, Liu B, Furqan M, Dai Q, Shahi S, et al. Prospective correlation  
648 between the patient microbiome with response to and development of  
649 immune-mediated adverse effects to immunotherapy in lung cancer. *BMC Cancer*.  
650 2021 Jul 13;21(1):808.
- 651 45. Liu W, Ma F, Sun B, Liu Y, Tang H, Luo J, et al. Intestinal Microbiome  
652 Associated With Immune-Related Adverse Events for Patients Treated With  
653 Anti-PD-1 Inhibitors, a Real-World Study. *Front Immunol*. 2021 Dec 16;12:756872.
- 654 46. Zhang Y, Cheng S, Zou H, Han Z, Xie T, Zhang B, et al. Correlation of the gut  
655 microbiome and immune-related adverse events in gastrointestinal cancer patients  
656 treated with immune checkpoint inhibitors. *Front Cell Infect Microbiol* [Internet].  
657 2023 [cited 2023 Jun 18];13. Available from:  
658 <https://www.frontiersin.org/articles/10.3389/fcimb.2023.1099063>
- 659 47. Dou X, Gao N, Yan D, Shan A. Sodium Butyrate Alleviates Mouse Colitis by  
660 Regulating Gut Microbiota Dysbiosis. *Anim Open Access J MDPI*. 2020 Jul  
661 7;10(7):1154.
- 662 48. Wu M, Li P, An Y, Ren J, Yan D, Cui J, et al. Phloretin ameliorates dextran  
663 sulfate sodium-induced ulcerative colitis in mice by regulating the gut microbiota.  
664 *Pharmacol Res*. 2019 Dec;150:104489.
- 665 49. Johanson DM, Goertz JE, Marin IA, Costello J, Overall CC, Gaultier A.  
666 Experimental autoimmune encephalomyelitis is associated with changes of the  
667 microbiota composition in the gastrointestinal tract. *Sci Rep*. 2020 Sep  
668 16;10(1):15183.
- 669 50. Ning J, Huang SY, Chen SD, Zhang YR, Huang YY, Yu JT. Investigating Casual  
670 Associations Among Gut Microbiota, Metabolites, and Neurodegenerative Diseases:  
671 A Mendelian Randomization Study. *J Alzheimers Dis JAD*. 2022;87(1):211–22.
- 672 51. Routy B, Le Chatelier E, Derosa L, Duong CPM, Alou MT, Daillère R, et al. Gut  
673 microbiome influences efficacy of PD-1–based immunotherapy against epithelial  
674 tumors. *Science*. 2018 Jan 5;359(6371):91–7.
- 675 52. Lee KA, Thomas AM, Bolte LA, Björk JR, de Ruijter LK, Armanini F, et al.  
676 Cross-cohort gut microbiome associations with immune checkpoint inhibitor response  
677 in advanced melanoma. *Nat Med*. 2022 Mar;28(3):535–44.
- 678 53. Derosa L, Routy B, Thomas AM, Iebba V, Zalcman G, Friard S, et al. Intestinal  
679 *Akkermansia muciniphila* predicts clinical response to PD-1 blockade in patients with  
680 advanced non-small-cell lung cancer. *Nat Med*. 2022 Feb;28(2):315–24.
- 681 54. Wang Y, Wiesnoski DH, Helmink BA, Gopalakrishnan V, Choi K, DuPont HL,  
682 et al. Fecal microbiota transplantation for refractory immune checkpoint  
683 inhibitor-associated colitis. *Nat Med*. 2018 Dec;24(12):1804–8.
- 684 55. Wang L, Tang L, Feng Y, Zhao S, Han M, Zhang C, et al. A purified membrane  
685 protein from *Akkermansia muciniphila* or the pasteurised bacterium blunts colitis  
686 associated tumorigenesis by modulation of CD8+ T cells in mice. *Gut*. 2020  
687 Nov;69(11):1988–97.

- 688 56. Chen J, Wright K, Davis JM, Jeraldo P, Marietta EV, Murray J, et al. An  
689 expansion of rare lineage intestinal microbes characterizes rheumatoid arthritis.  
690 *Genome Med.* 2016 Apr 21;8(1):43.
- 691 57. Miyauchi E, Shimokawa C, Steimle A, Desai MS, Ohno H. The impact of the gut  
692 microbiome on extra-intestinal autoimmune diseases. *Nat Rev Immunol.* 2023  
693 Jan;23(1):9–23.
- 694 58. Martins F, Sofiya L, Sykiotis GP, Lamine F, Maillard M, Fraga M, et al. Adverse  
695 effects of immune-checkpoint inhibitors: epidemiology, management and surveillance.  
696 *Nat Rev Clin Oncol.* 2019 Sep;16(9):563–80.
- 697 59. Postow MA, Sidlow R, Hellmann MD. Immune-Related Adverse Events  
698 Associated with Immune Checkpoint Blockade. *N Engl J Med.* 2018 Jan  
699 11;378(2):158–68.
- 700 60. Du C, Yao SY, Ljunggren-Rose Å, Sriram S. Chlamydia pneumoniae Infection of  
701 the Central Nervous System Worsens Experimental Allergic Encephalitis. *J Exp Med.*  
702 2002 Dec 16;196(12):1639–44.
- 703 61. Rodríguez Y, Rojas M, Pacheco Y, Acosta-Ampudia Y, Ramírez-Santana C,  
704 Monsalve DM, et al. Guillain–Barré syndrome, transverse myelitis and infectious  
705 diseases. *Cell Mol Immunol.* 2018 Jun;15(6):547–62.
- 706 62. Gülden E, Wong FS, Wen L. The gut microbiota and Type 1 Diabetes. *Clin*  
707 *Immunol.* 2015 Aug 1;159(2):143–53.
- 708 63. Lundberg K, Kinloch A, Fisher BA, Wegner N, Wait R, Charles P, et al.  
709 Antibodies to citrullinated  $\alpha$ -enolase peptide 1 are specific for rheumatoid arthritis  
710 and cross-react with bacterial enolase. *Arthritis Rheum.* 2008;58(10):3009–19.
- 711 64. Tanaka A, Leung PSC, Gershwin ME. Pathogen infections and primary biliary  
712 cholangitis. *Clin Exp Immunol.* 2019 Jan 1;195(1):25–34.
- 713 65. Rojas M, Restrepo-Jiménez P, Monsalve DM, Pacheco Y, Acosta-Ampudia Y,  
714 Ramírez-Santana C, et al. Molecular mimicry and autoimmunity. *J Autoimmun.* 2018  
715 Dec;95:100–23.
- 716 66. Wang SJ, Dougan SK, Dougan M. Immune mechanisms of toxicity from  
717 checkpoint inhibitors. *Trends Cancer.* 2023 Jul 1;9(7):543–53.
- 718 67. Park J, Kim M, Kang SG, Jannasch AH, Cooper B, Patterson J, et al. Short-chain  
719 fatty acids induce both effector and regulatory T cells by suppression of histone  
720 deacetylases and regulation of the mTOR–S6K pathway. *Mucosal Immunol.* 2015  
721 Jan;8(1):80–93.
- 722 68. Luu M, Riester Z, Baldrich A, Reichardt N, Yuille S, Buseti A, et al. Microbial  
723 short-chain fatty acids modulate CD8+ T cell responses and improve adoptive  
724 immunotherapy for cancer. *Nat Commun.* 2021 Jul 1;12(1):4077.
- 725 69. Zhou G, Zhang N, Meng K, Pan F. Interaction between gut microbiota and  
726 immune checkpoint inhibitor-related colitis. *Front Immunol.* 2022 Oct  
727 27;13:1001623.
- 728 70. BÖCKER U, NEBE T, HERWECK F, HOLT L, PANJA A, JOBIN C, et al.  
729 Butyrate modulates intestinal epithelial cell-mediated neutrophil migration. *Clin Exp*  
730 *Immunol.* 2003 Jan;131(1):53–60.
- 731 71. Lee C, Kim BG, Kim JH, Chun J, Im JP, Kim JS. Sodium butyrate inhibits the

- 732 NF-kappa B signaling pathway and histone deacetylation, and attenuates experimental  
733 colitis in an IL-10 independent manner. *Int Immunopharmacol.* 2017 Oct;51:47–56.
- 734 72. den Besten G, van Eunen K, Groen AK, Venema K, Reijngoud DJ, Bakker BM.  
735 The role of short-chain fatty acids in the interplay between diet, gut microbiota, and  
736 host energy metabolism. *J Lipid Res.* 2013 Sep;54(9):2325–40.
- 737 73. Wang Y, Jenq RR, Wargo JA, Watowich SS. Microbiome influencers of  
738 checkpoint blockade-associated toxicity. *J Exp Med.* 2023 Mar 6;220(3):e20220948.
- 739 74. Schneider BJ, Naidoo J, Santomaso BD, Lacchetti C, Adkins S, Anadkat M, et al.  
740 Management of Immune-Related Adverse Events in Patients Treated With Immune  
741 Checkpoint Inhibitor Therapy: ASCO Guideline Update. *J Clin Oncol.* 2021 Dec  
742 20;39(36):4073–126.
- 743 75. Davar D, Dzutsev AK, McCulloch JA, Rodrigues RR, Chauvin JM, Morrison  
744 RM, et al. Fecal microbiota transplant overcomes resistance to anti-PD-1 therapy in  
745 melanoma patients. *Science.* 2021 Feb 5;371(6529):595–602.
- 746 76. Baruch EN, Youngster I, Ben-Betzalel G, Ortenberg R, Lahat A, Katz L, et al.  
747 Fecal microbiota transplant promotes response in immunotherapy-refractory  
748 melanoma patients. *Science.* 2021 Feb 5;371(6529):602–9.
- 749 77. Chen M, Liu M, Li C, Peng S, Li Y, Xu X, et al. Fecal Microbiota  
750 Transplantation Effectively Cures a Patient With Severe Bleeding Immune  
751 Checkpoint Inhibitor-Associated Colitis and a Short Review. *Front Oncol.* 2022 Jun  
752 10;12:913217.
- 753 78. Soularue E, Lepage P, Colombel JF, Coutzac C, Faleck D, Marthey L, et al.  
754 Enterocolitis due to immune checkpoint inhibitors: a systematic review. *Gut.* 2018  
755 Nov 1;67(11):2056–67.

756

## 757 **Figure legends:**

758 **Figure 1.** Overview of the study design.

759 Initially, IVs were selected from the summary GWAS data of the gut microbiota and  
760 irAEs. Subsequently, by employing thresholds of p-value (IVW) < 0.05 and p-value  
761 (MR PRESSO) < 0.05, the identified gut microbiota that exhibited statistically  
762 significant associations were taken into further analysis. irAEs = immune-related  
763 adverse events; ICIs = immune checkpoint inhibitors; BMI = body mass index; WC =  
764 Waist circumference; HP = Hip circumference; WHR = Waist-to-hip ratio. (Created  
765 with BioRender.com).

766 **Figure 2.** Forest plots of MR results for the causal association between the identified  
767 eight gut microbial taxa and high-grade irAEs (grade 3 to 5 events). NSNP = number  
768 of SNPs; Beta = effect size from the exposure to the outcome; CI = confidence  
769 interval.

770 **Figure 3.** Forest plots of MR results for the causal association between the identified  
771 seven gut microbial taxa and all-grade irAEs (grade 1 to 5 events). NSNP = number of  
772 SNPs; Beta = effect size from the exposure to the outcome; CI = confidence interval.

773 **Figure 4.** Scatter plots of MR analysis between the gut microbial taxa and high-grade  
774 irAEs (grade 3 to 5 events).

775 **Figure 5.** Scatter plots of MR analysis between the gut microbial taxa and all-grade  
776 irAEs (grade 1 to 5 events).

777 **Figure 6.** Leave-one-out plots of MR analysis between the gut microbial taxa and  
778 high-grade irAEs (grade 3 to 5 events).

779 **Figure 7.** Leave-one-out plots of MR analysis between the gut microbial taxa and  
780 all-grade irAEs (grade 1 to 5 events).

781

782 **Figure S1.** Illustration of MR assumptions

783

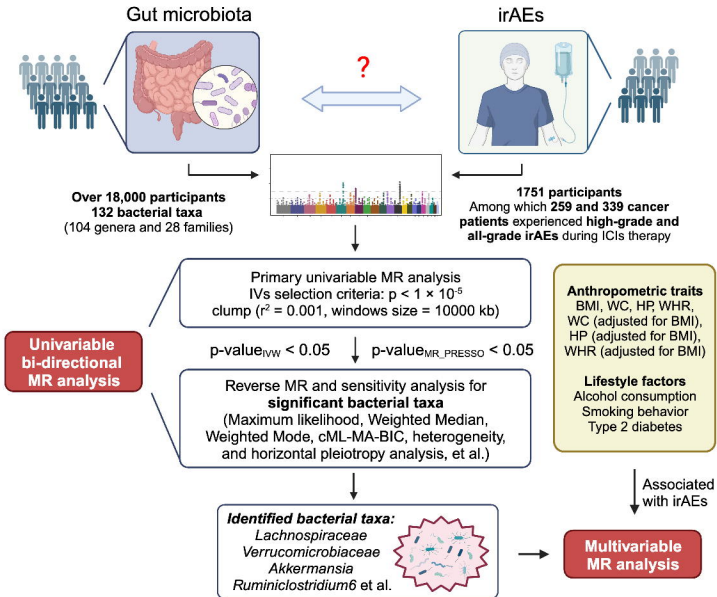



# High-grade irAEs

## Family level

### *Lachnospiraceae*

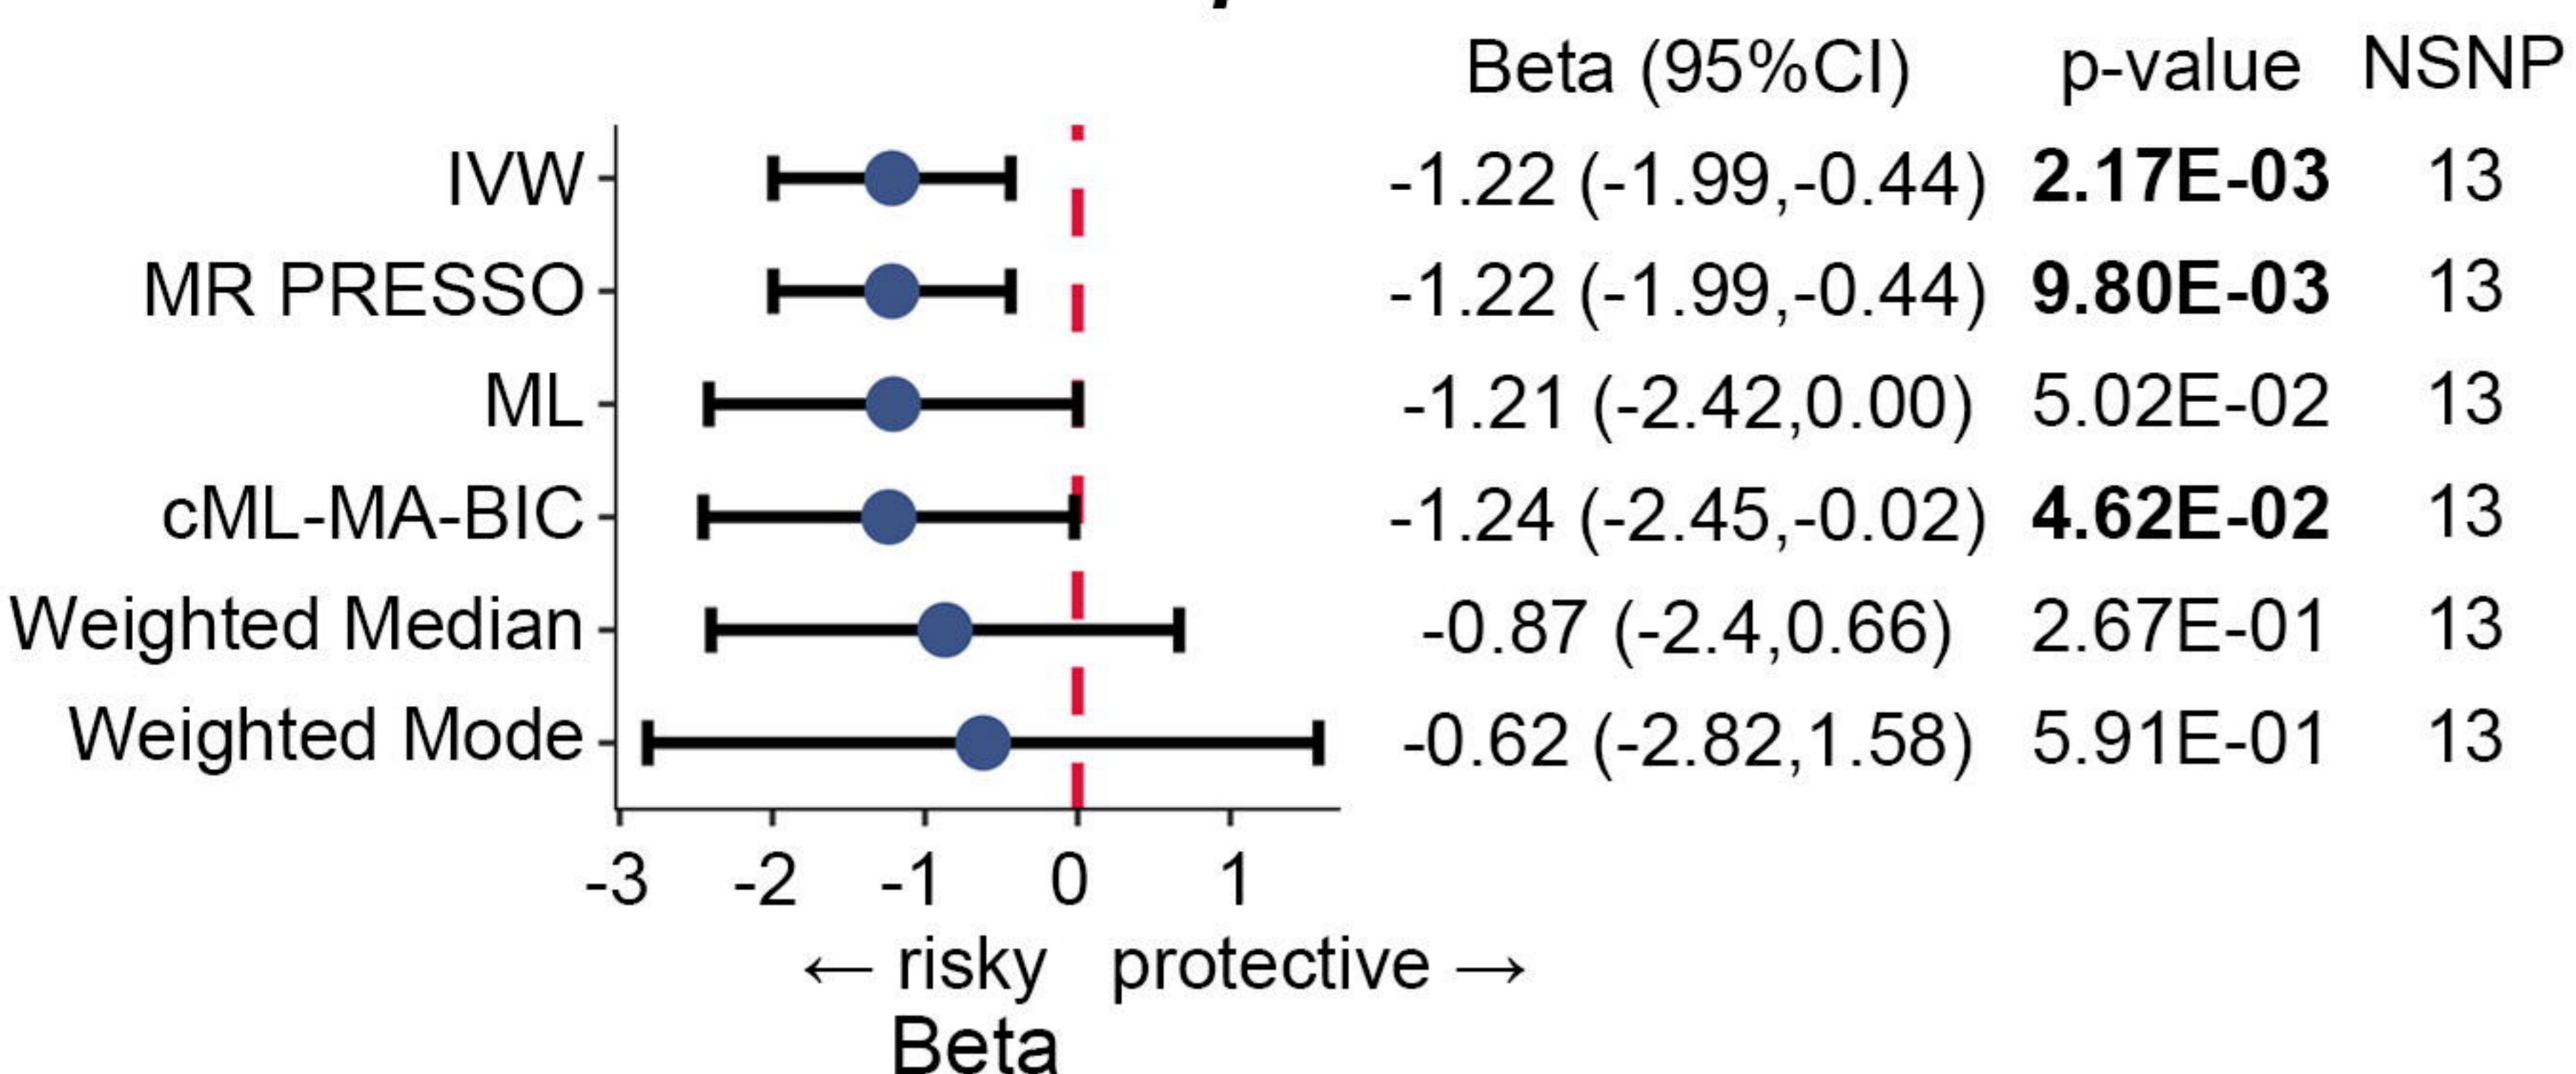

### *Verrucomicrobiaceae*

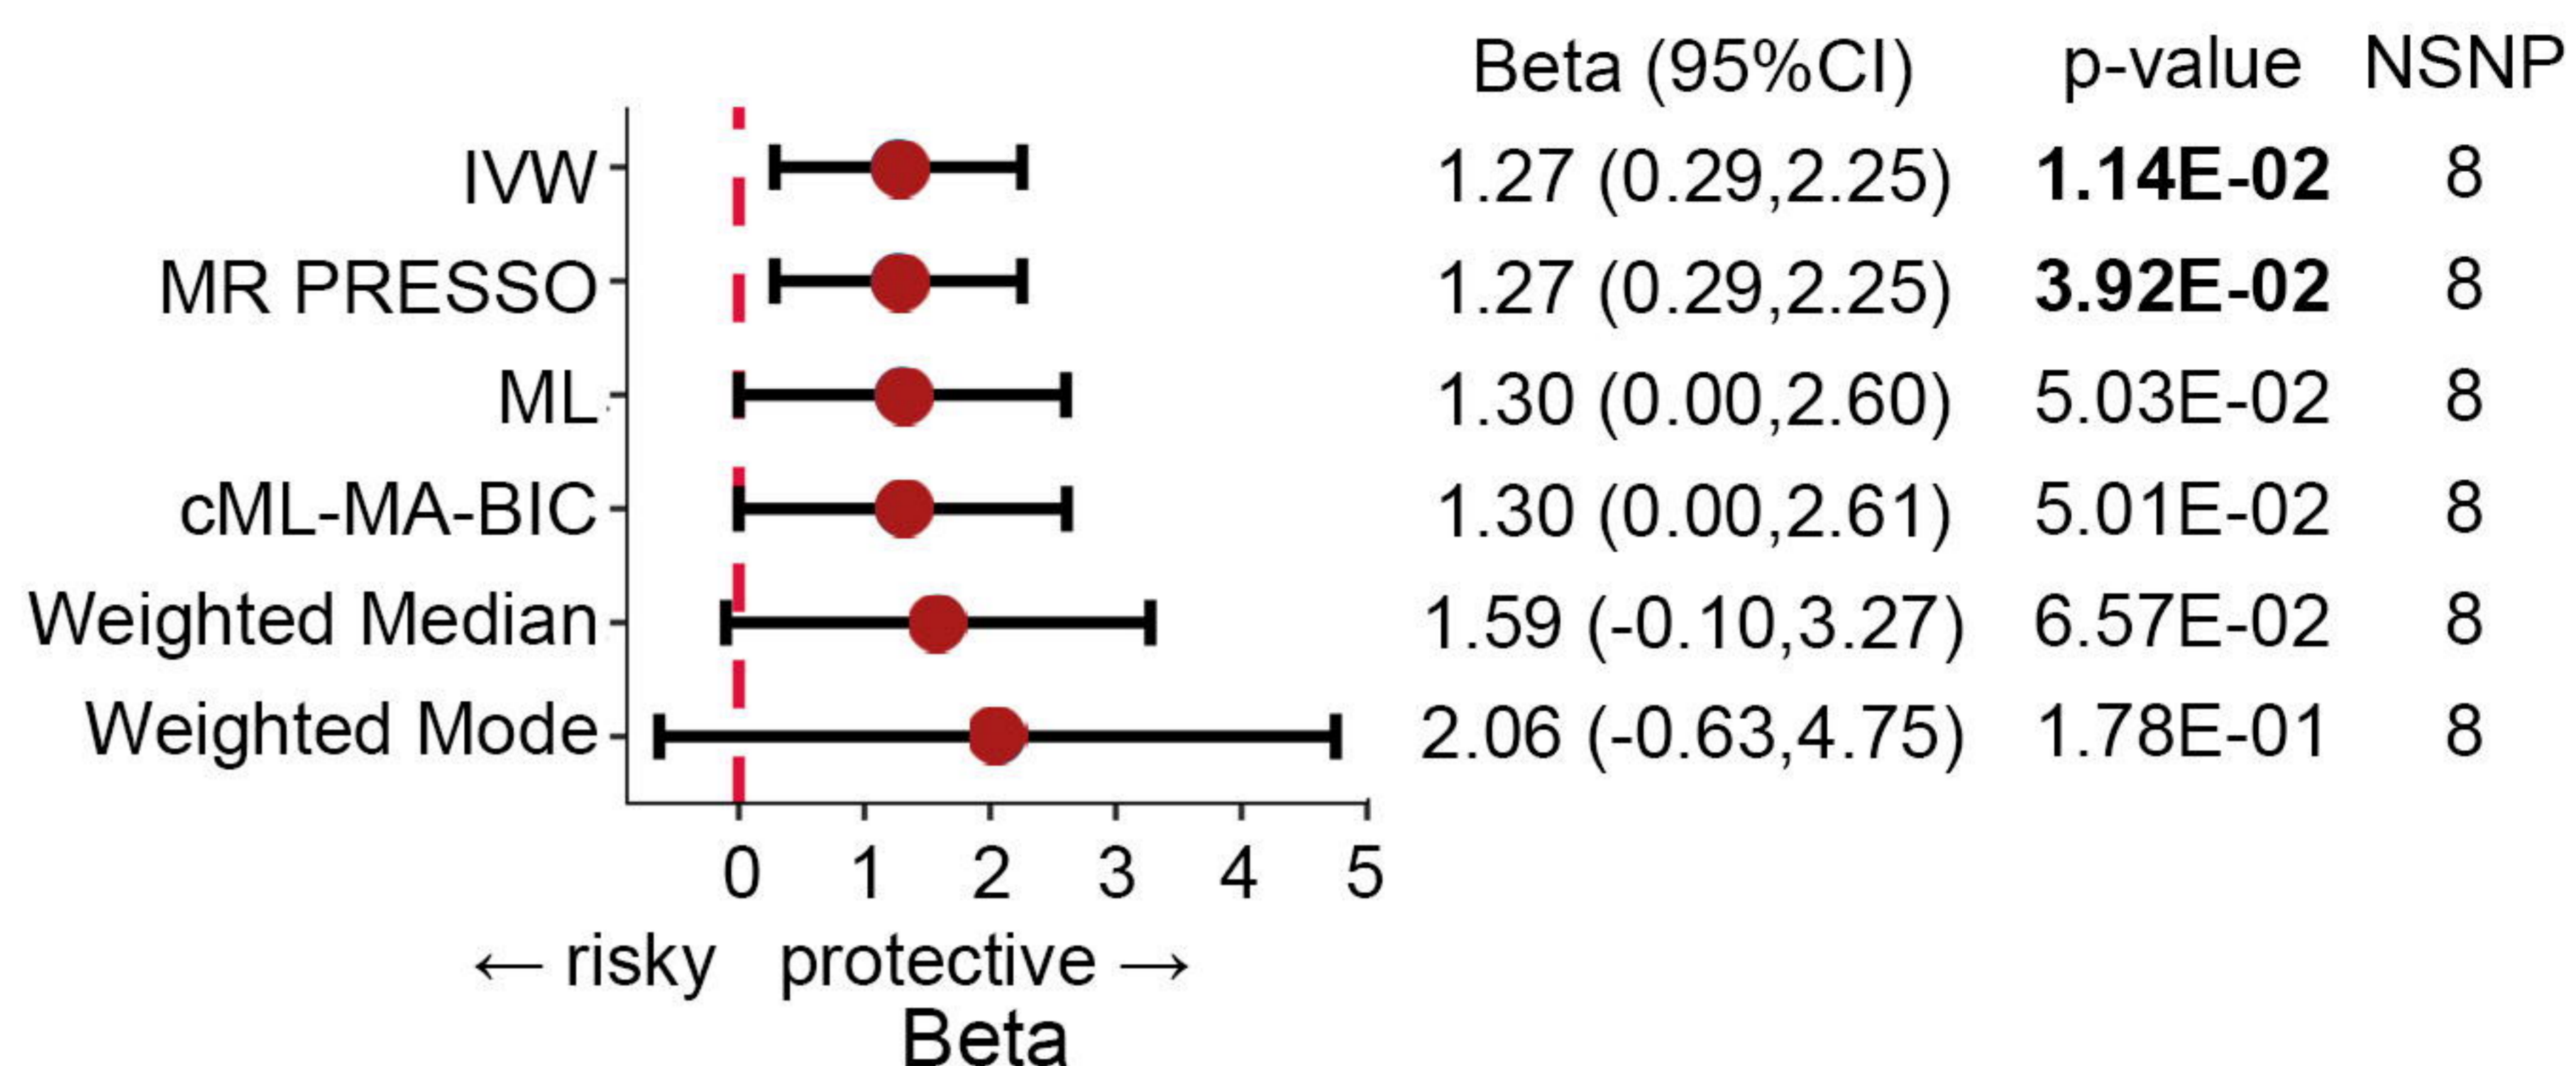

## Genus level

### *Ruminiclostridium6*

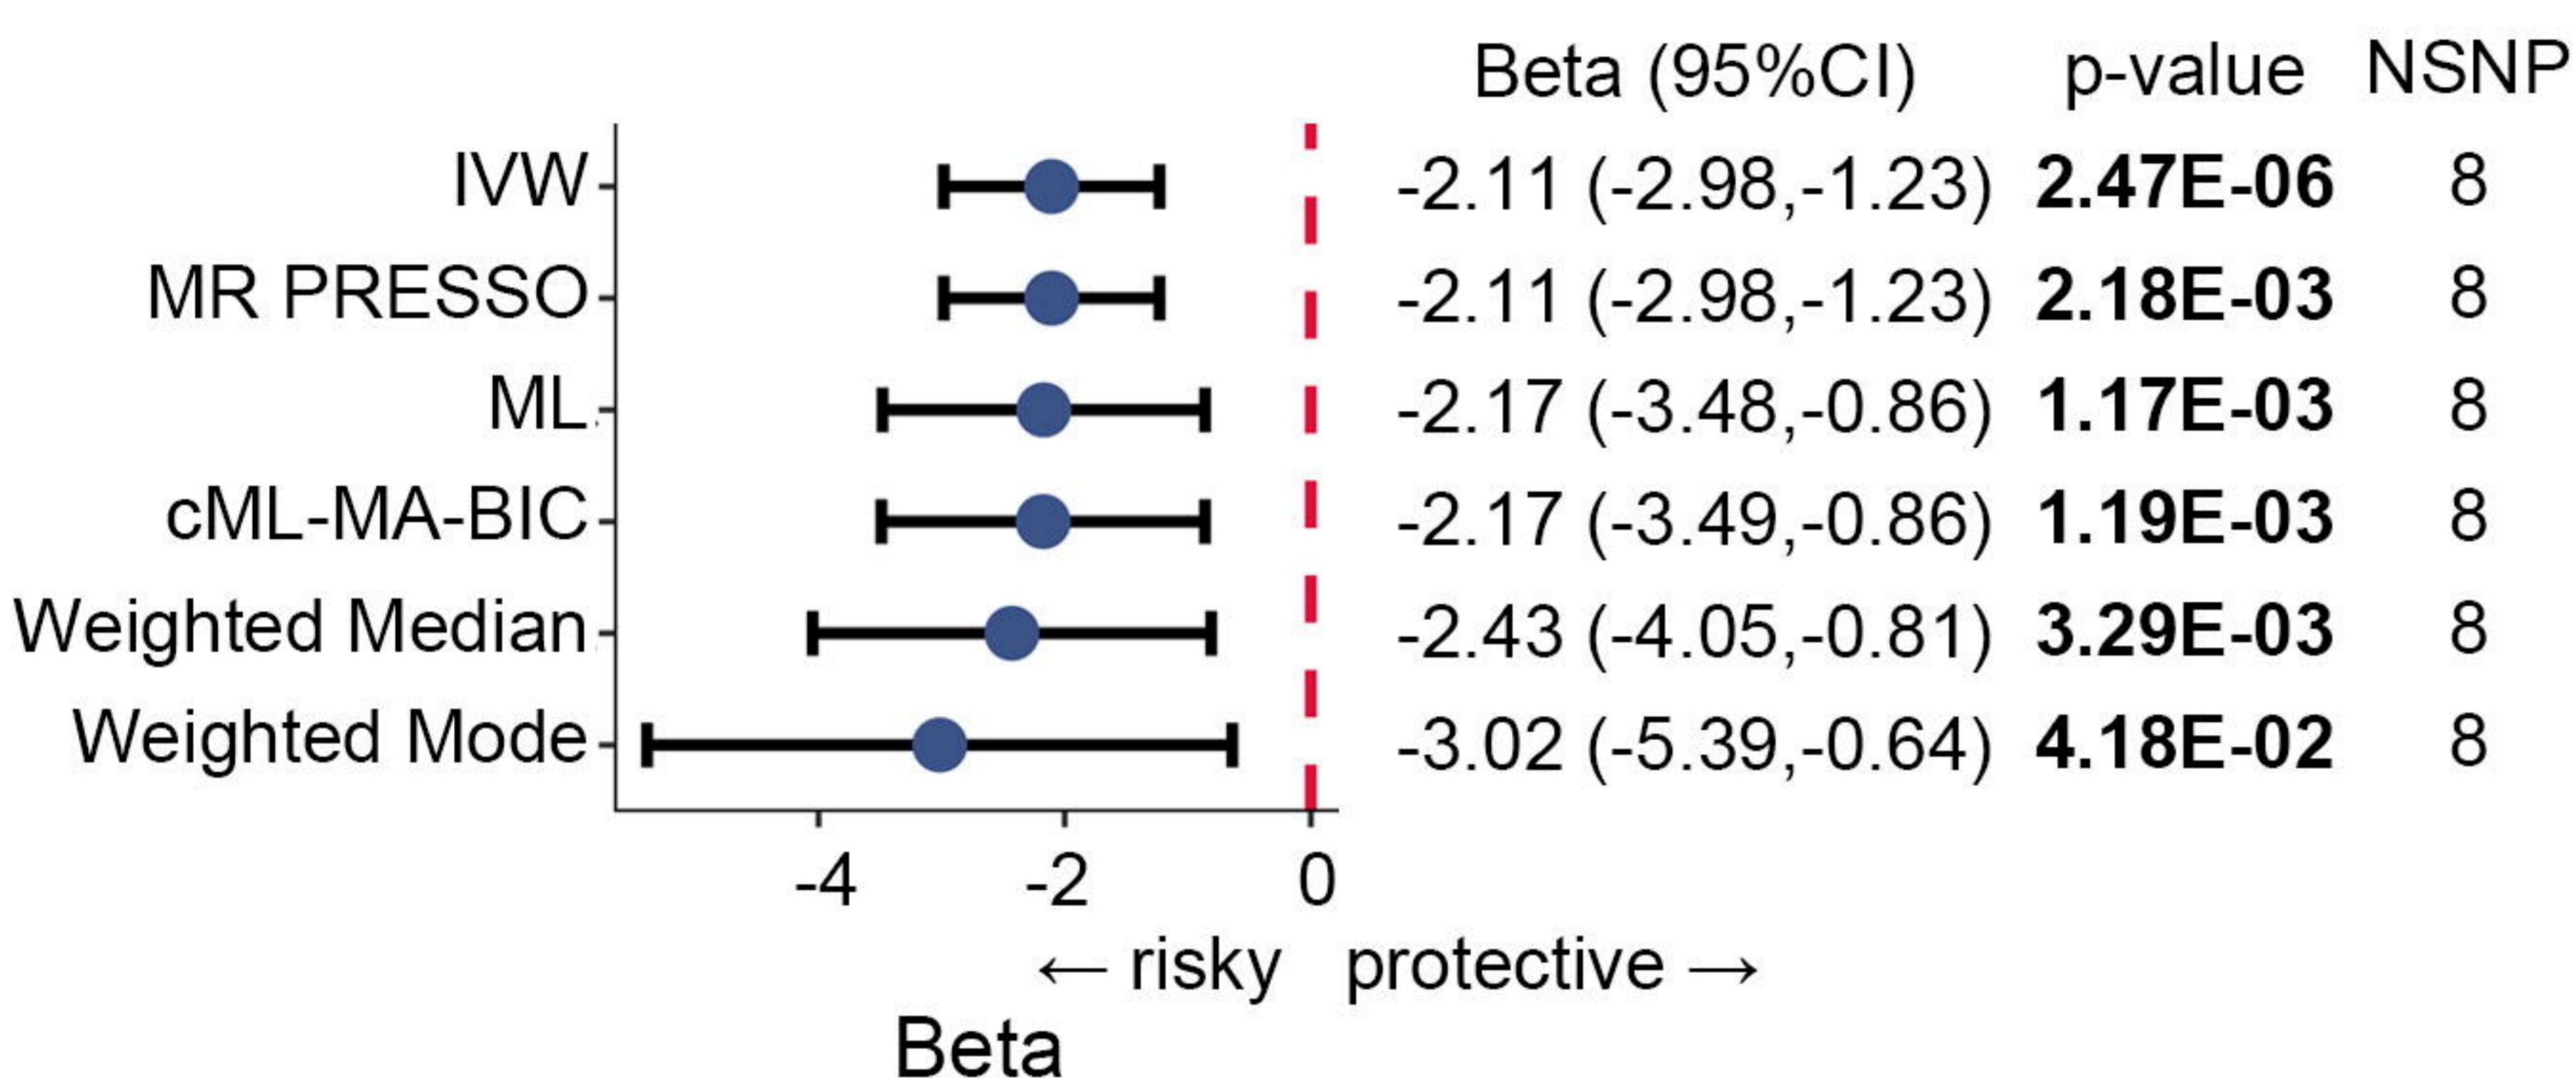

### *Coprococcus3*

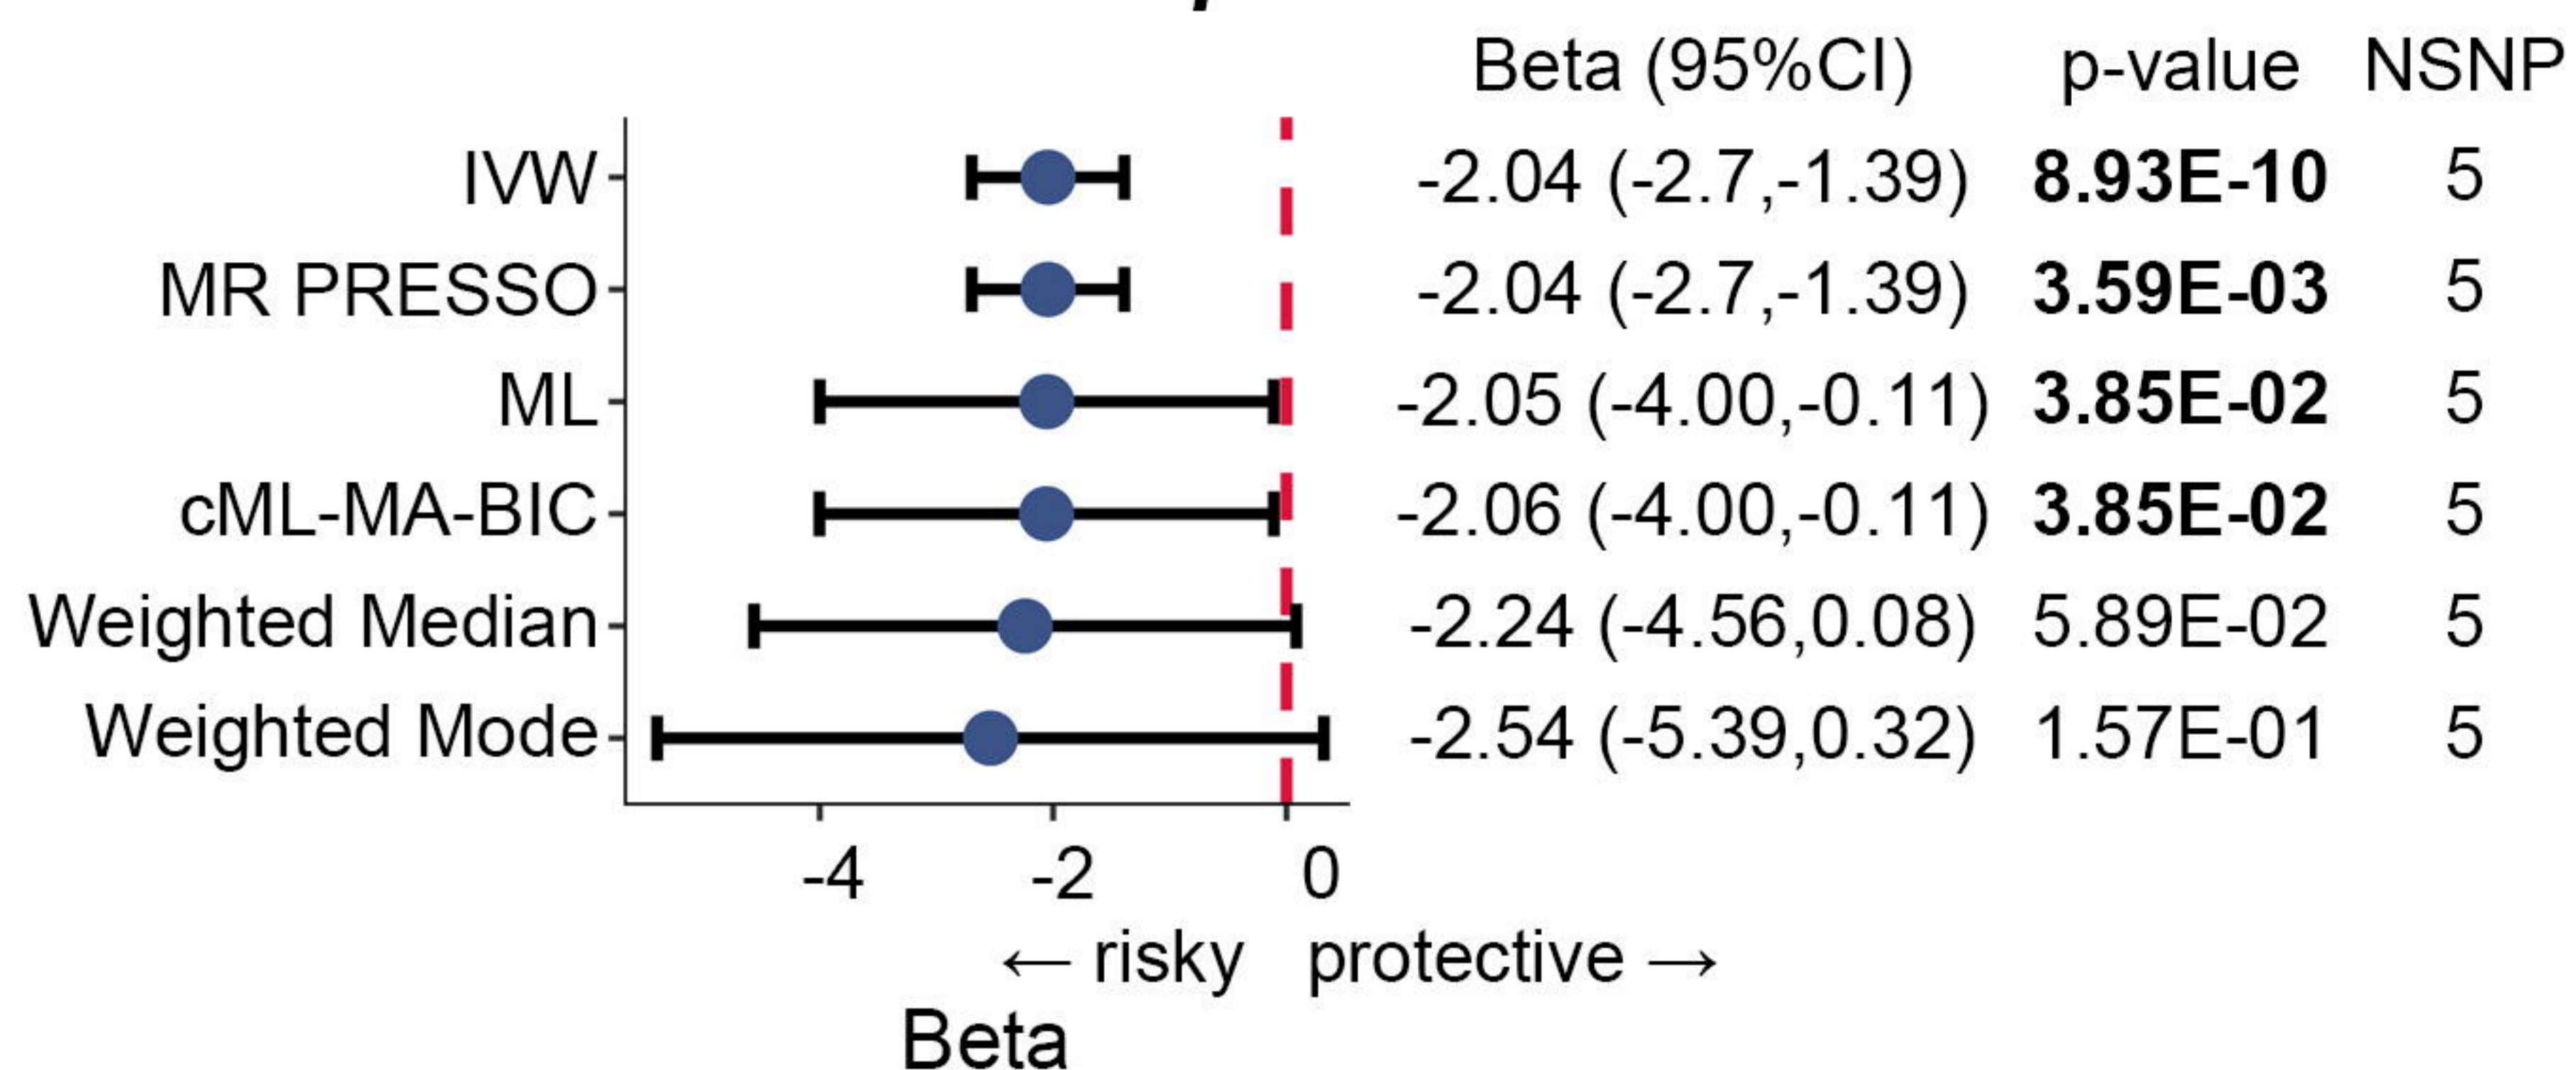

### *Anaerostipes*

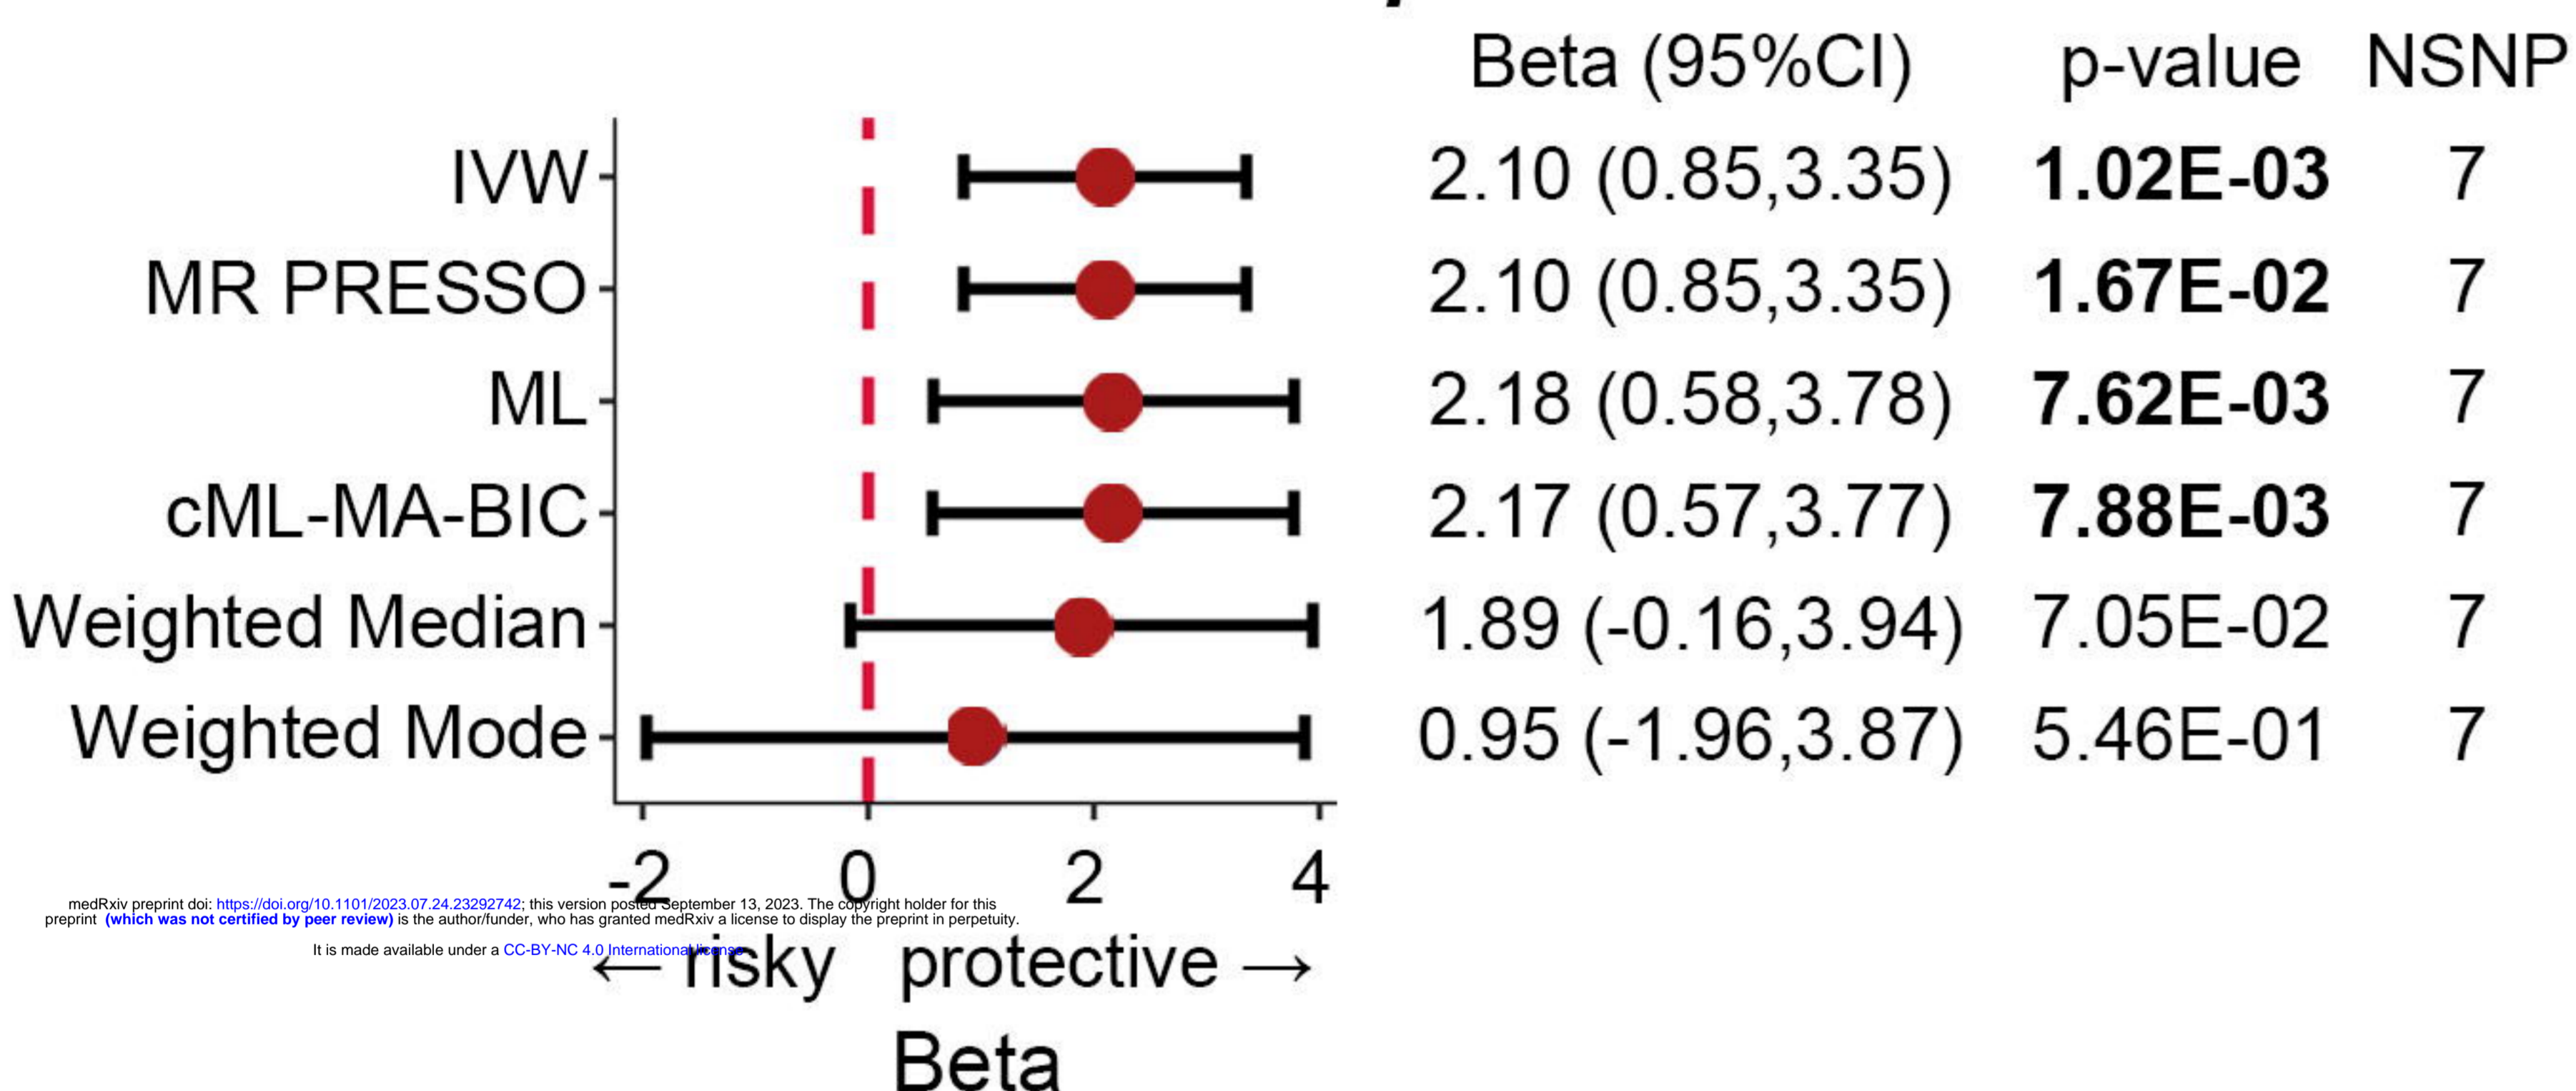

### *Akkermansia*

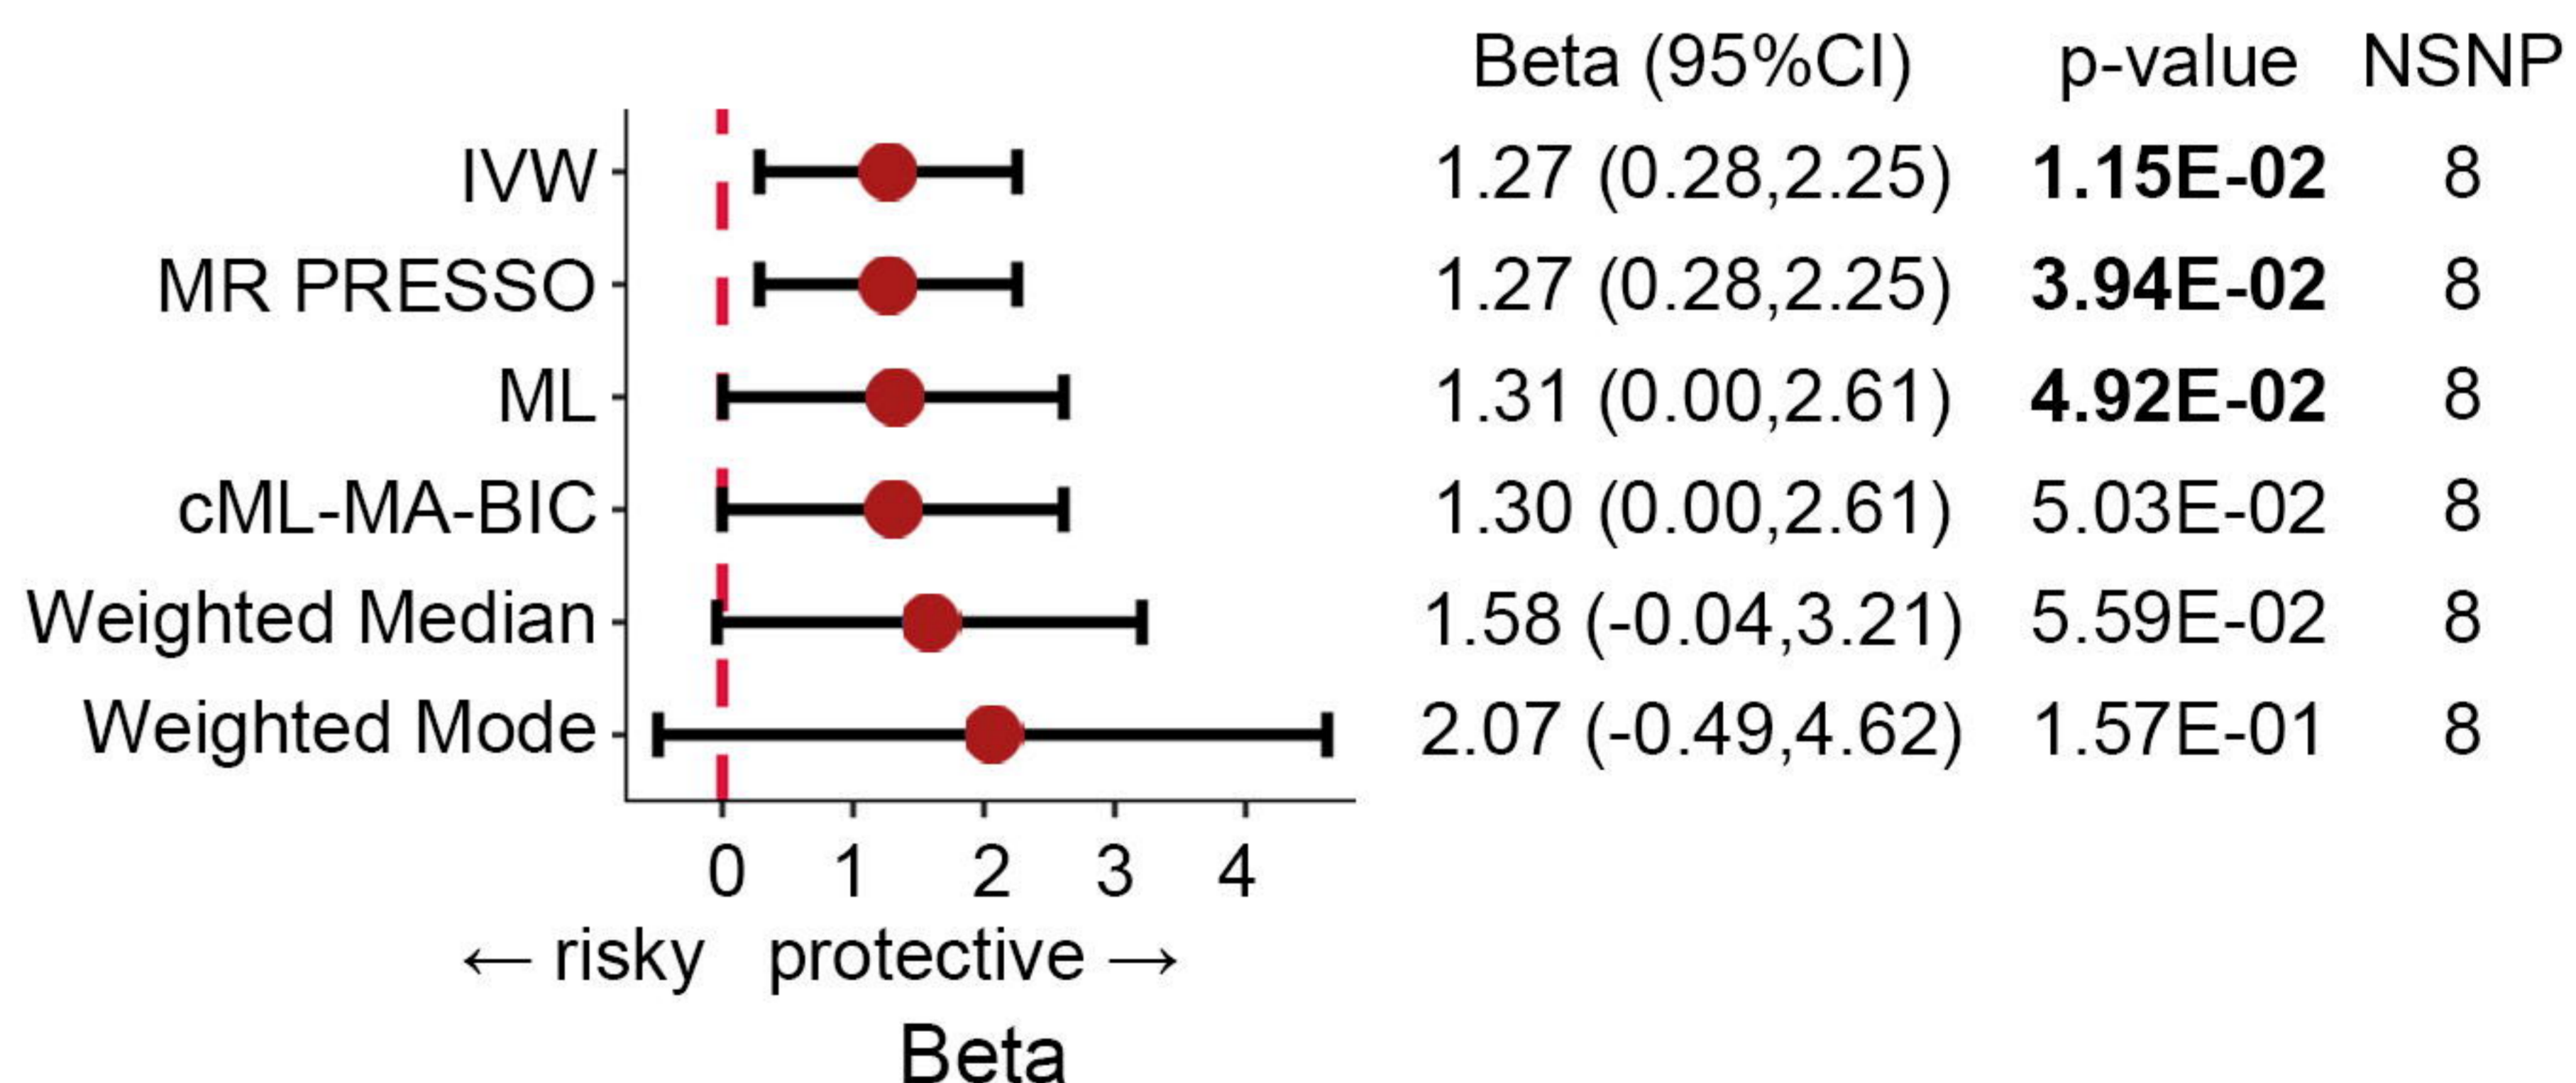

### *Collinsella*

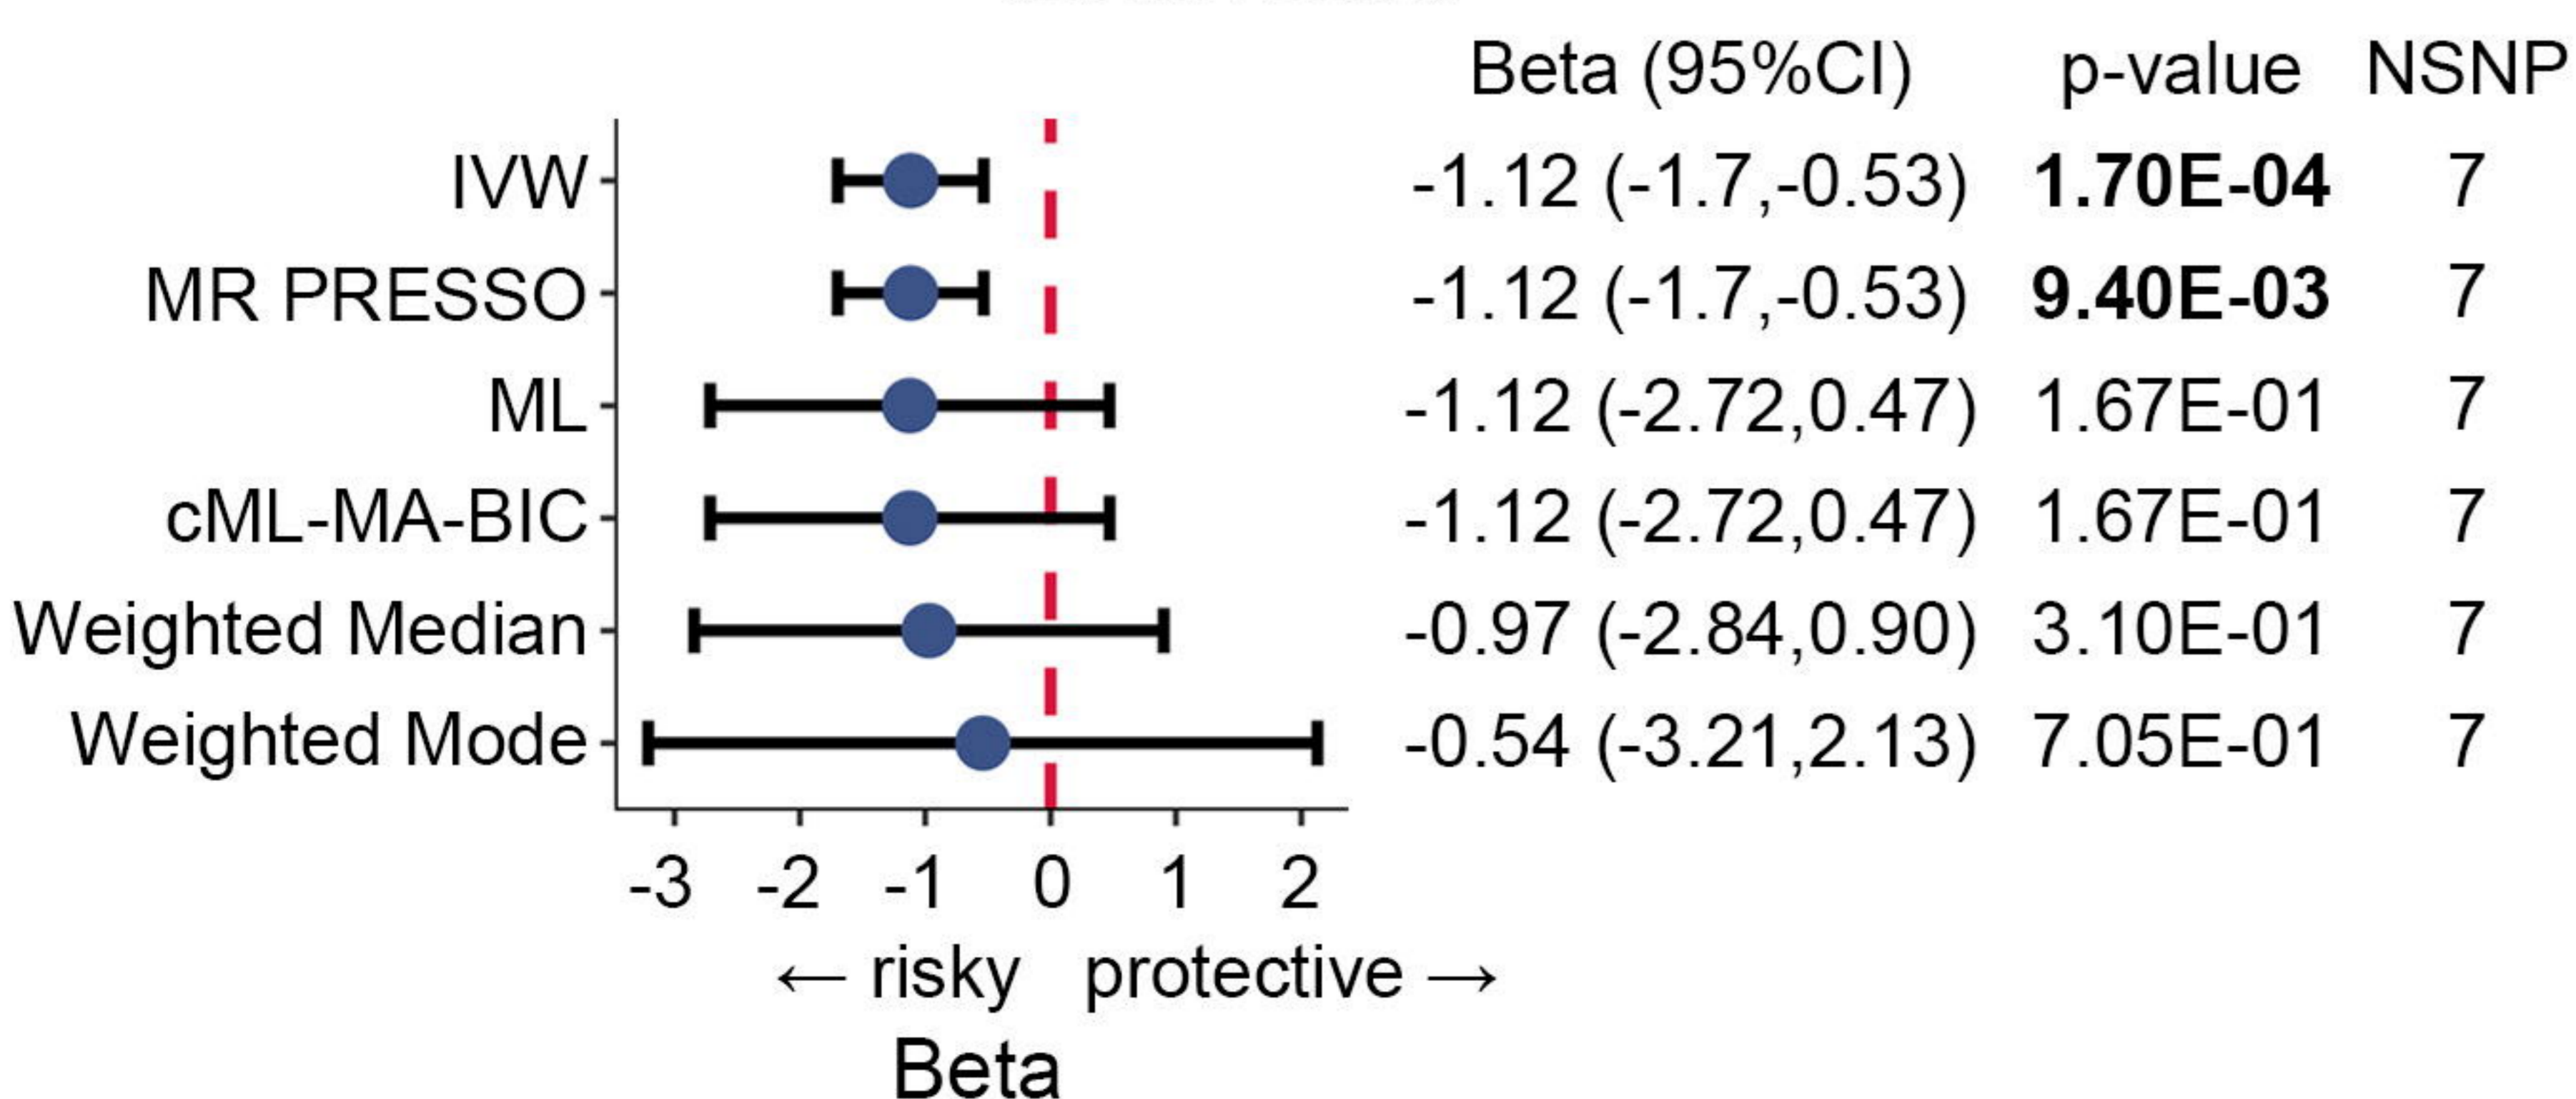

### *Eubacterium (fissicatena group)*

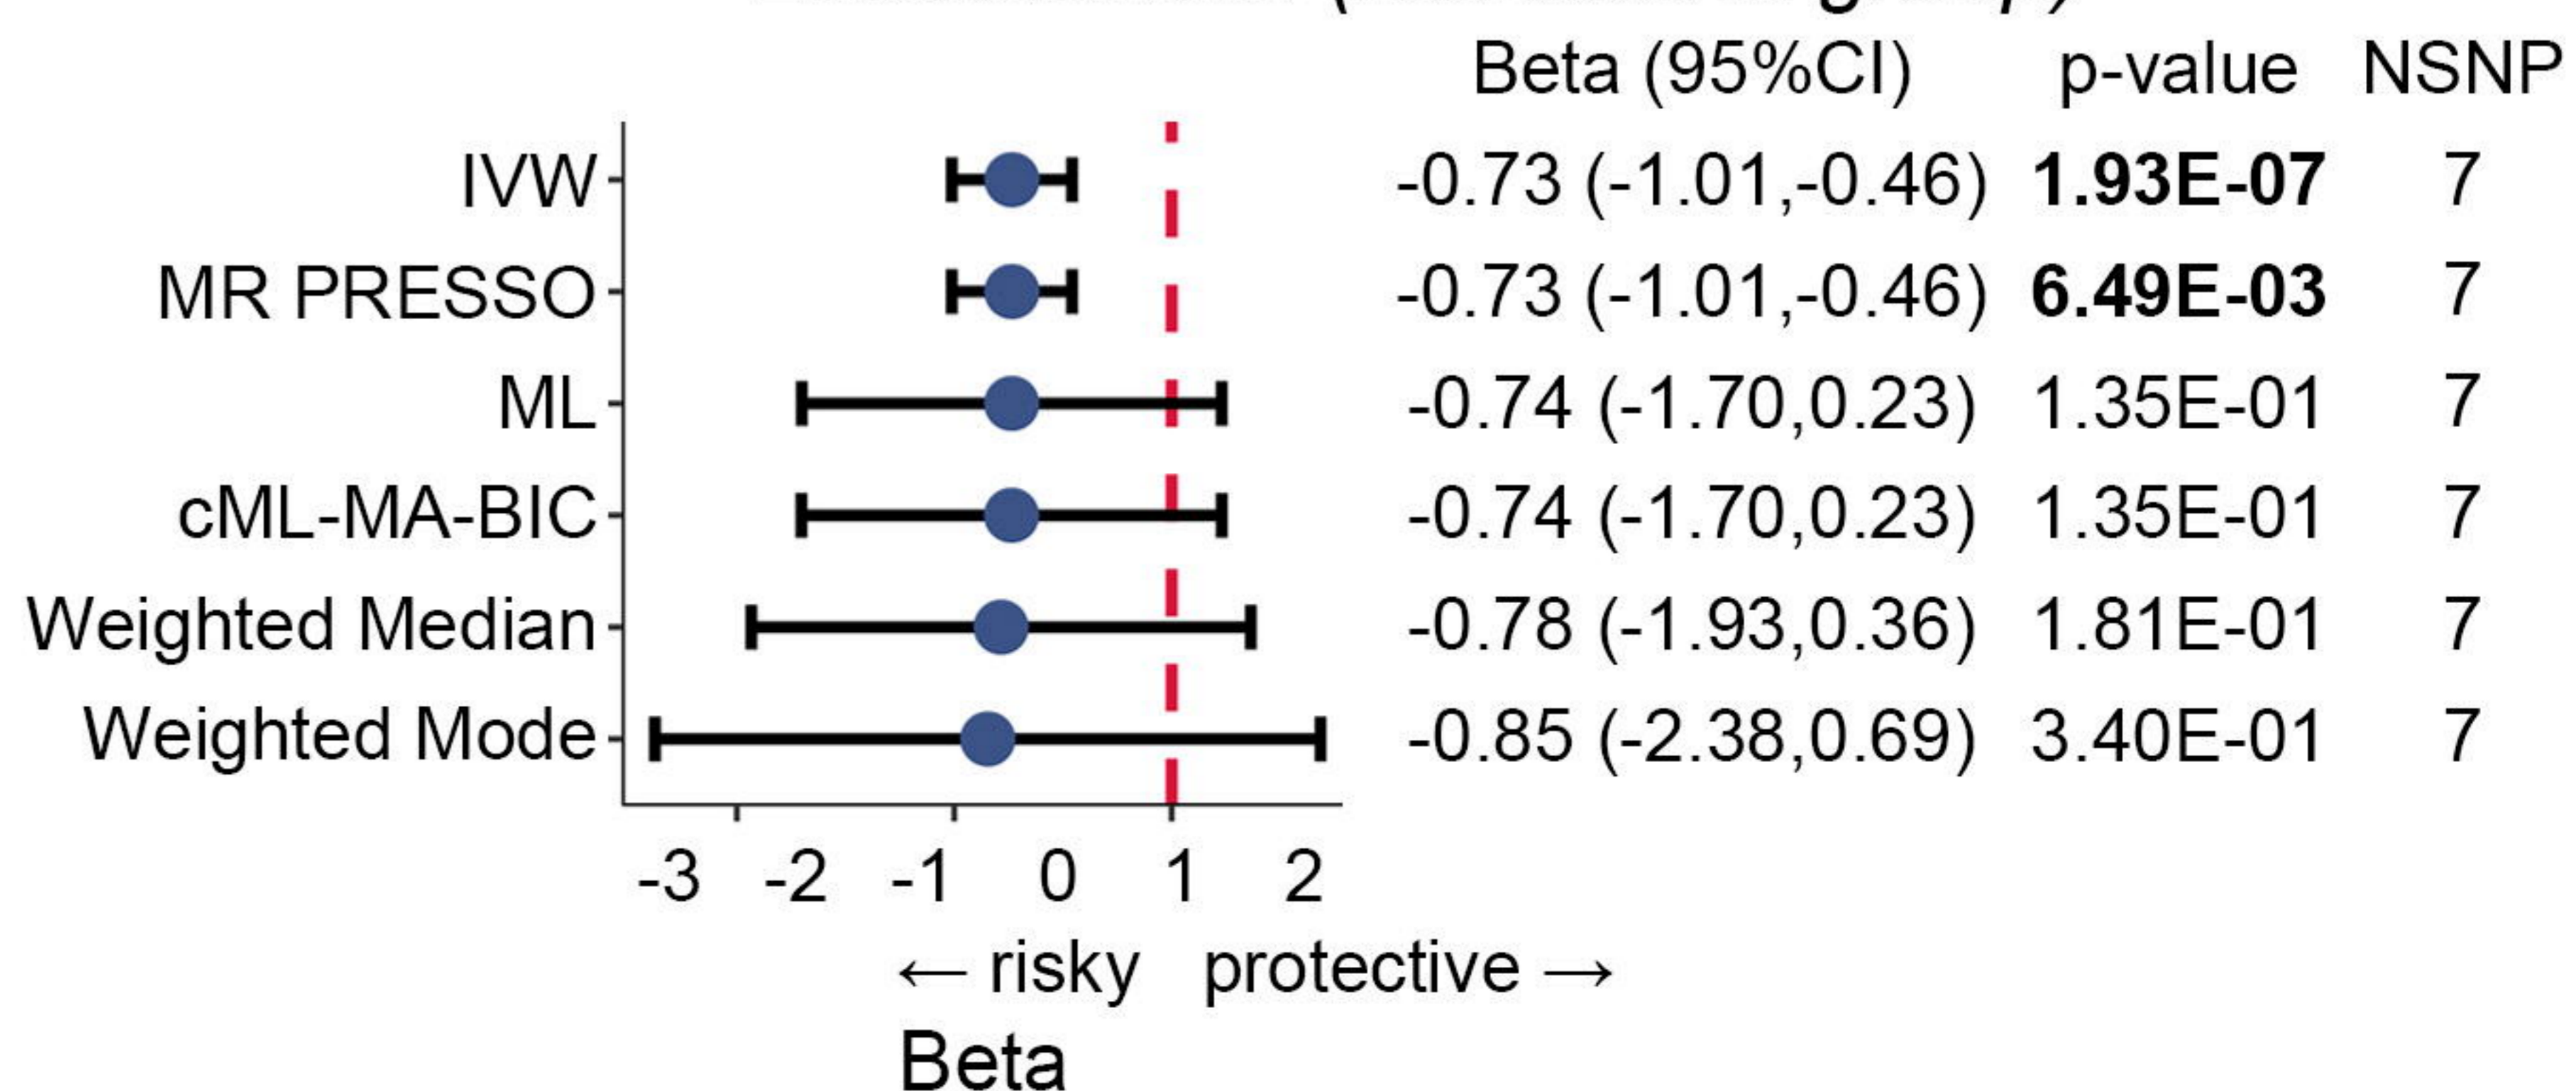

medRxiv preprint doi: <https://doi.org/10.1101/2023.07.24.23292742>; this version posted September 13, 2023. The copyright holder for this preprint (which was not certified by peer review) is the author/funder, who has granted medRxiv a license to display the preprint in perpetuity. It is made available under a [CC-BY-NC 4.0 International license](https://creativecommons.org/licenses/by-nc/4.0/).



# All-grade irAEs

## Family level

### *Lachnospiraceae*

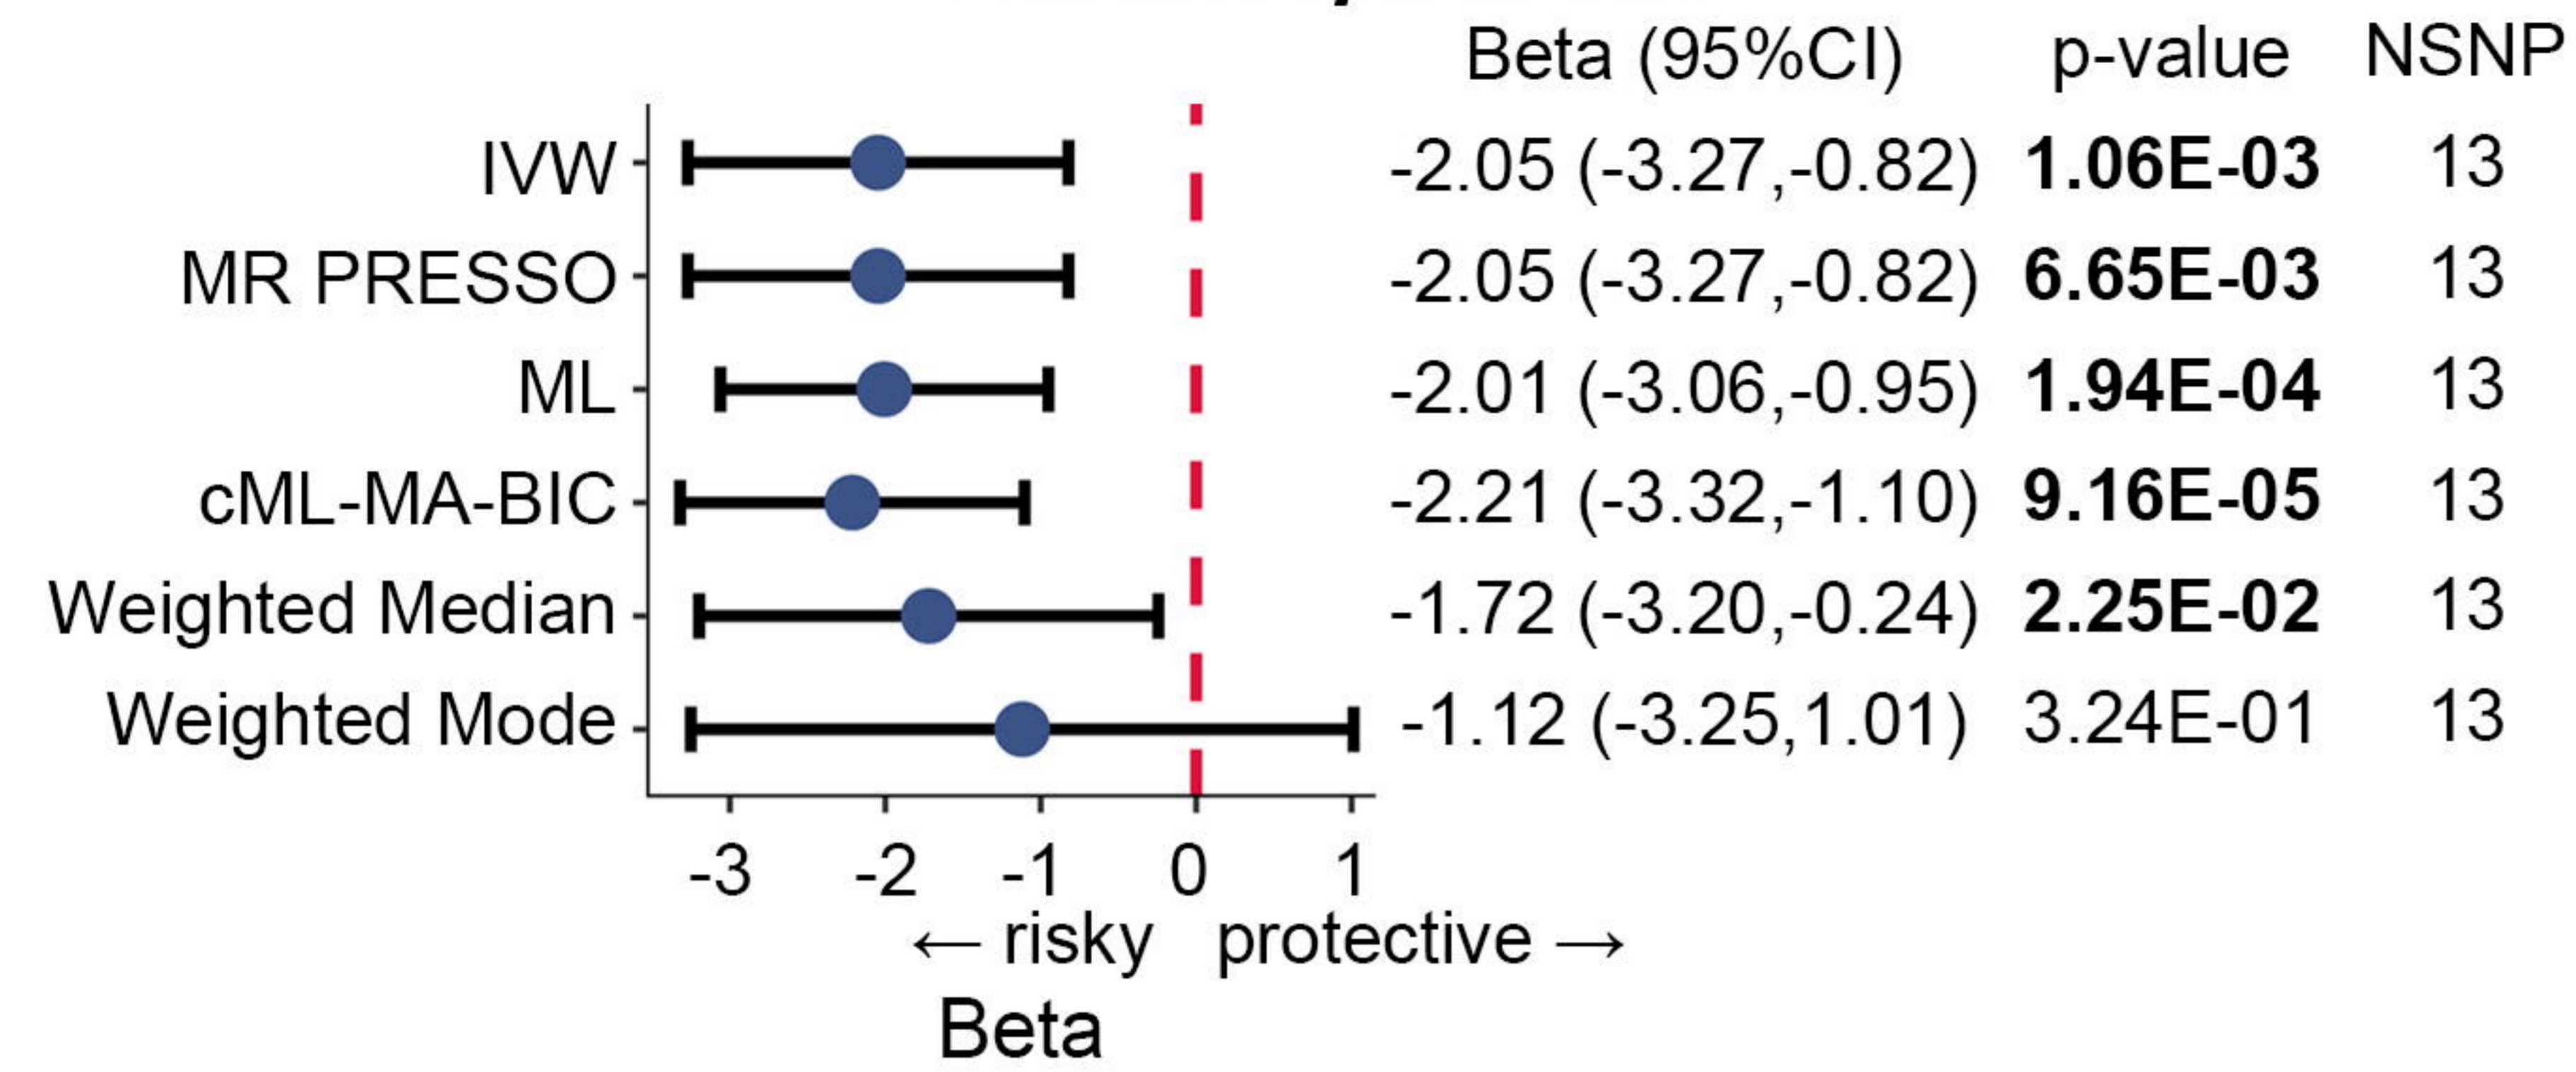

### *Porphyromonadaceae*

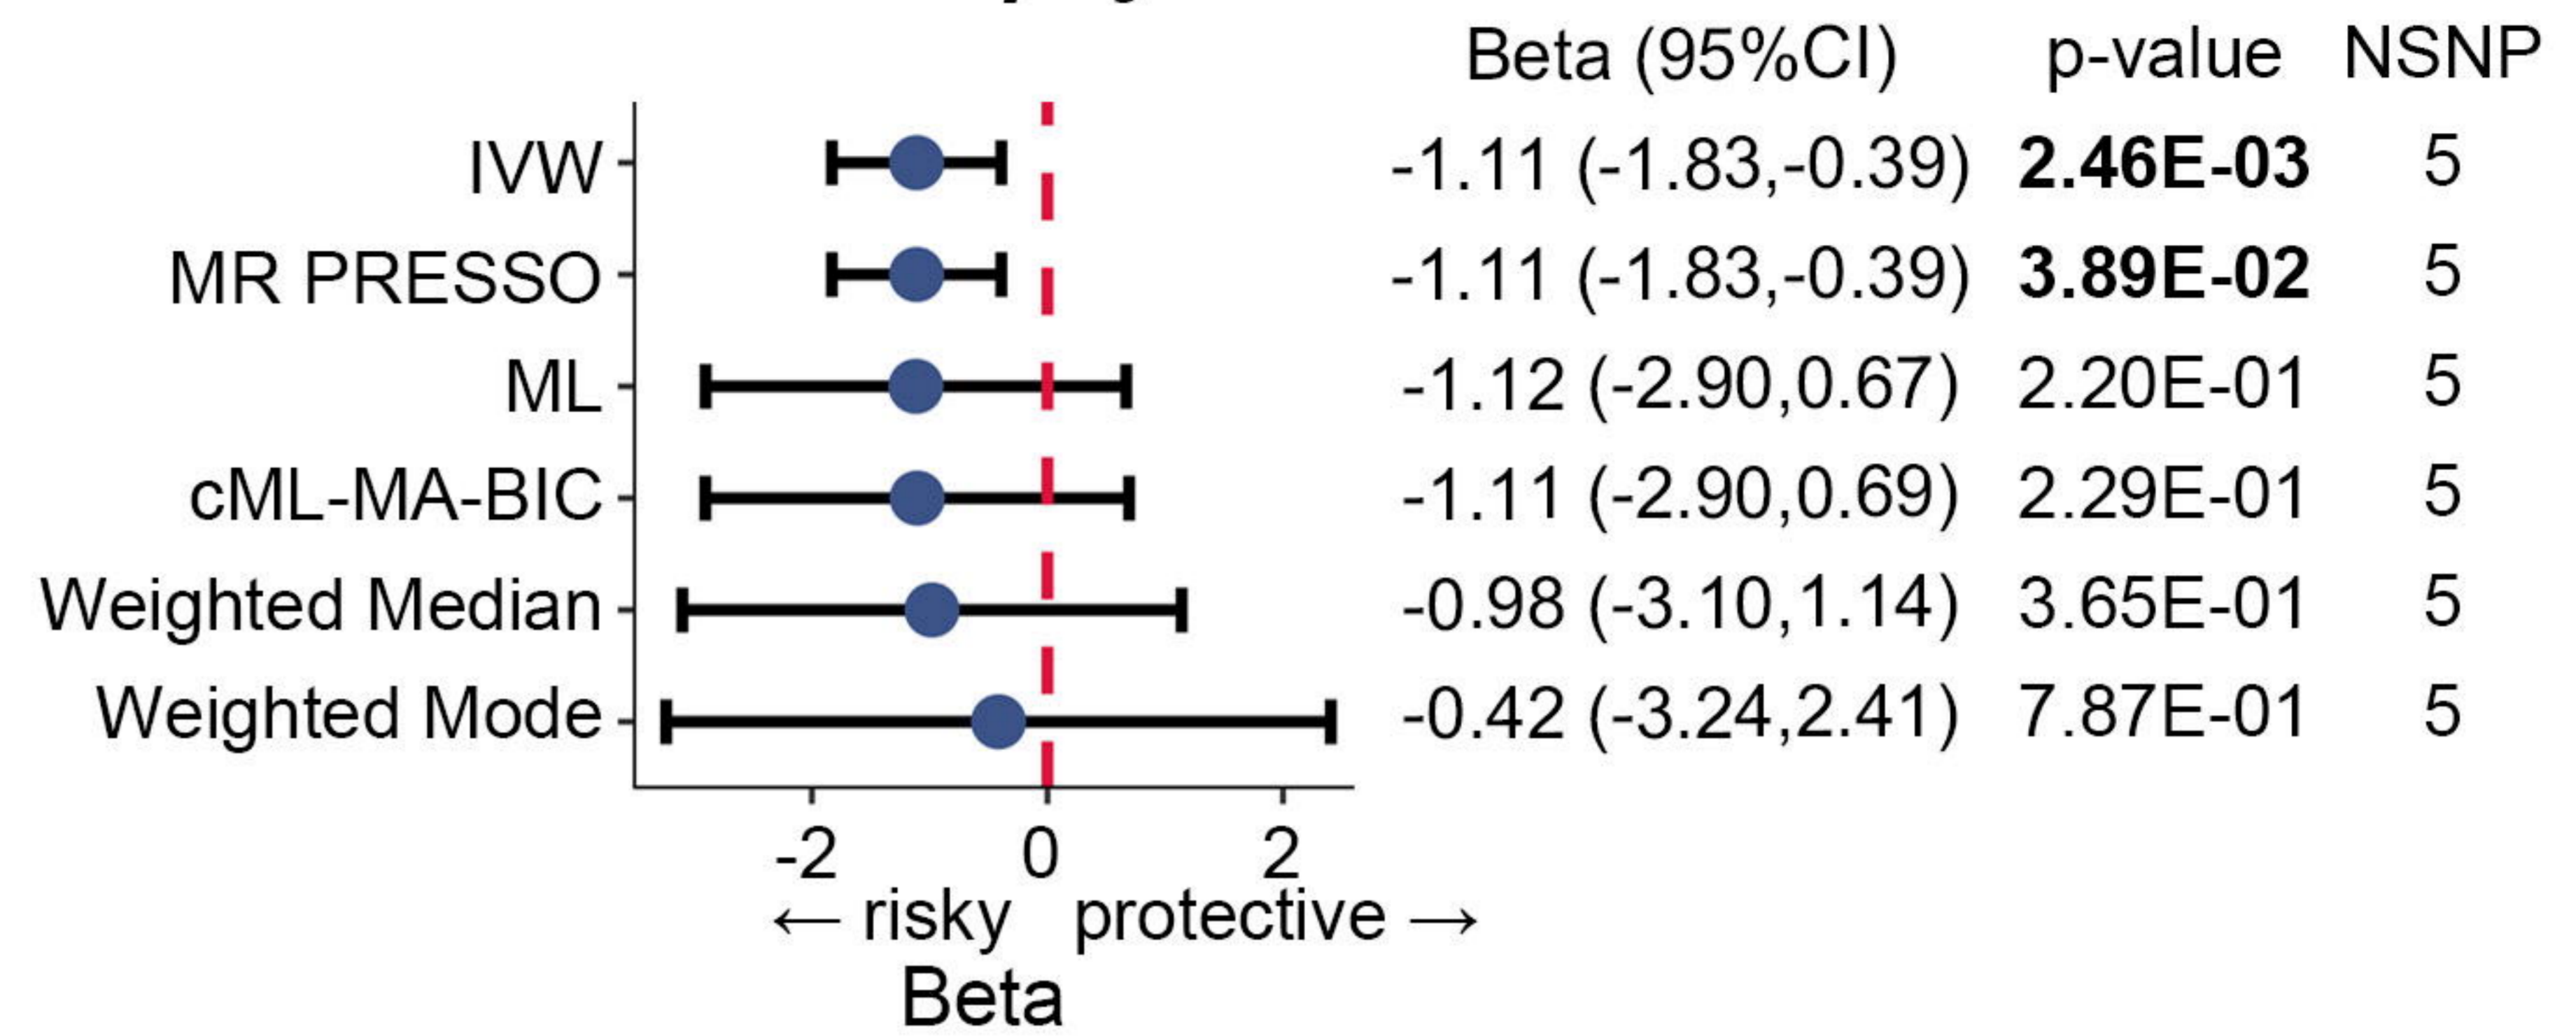

## Genus level

### *Roseburia*

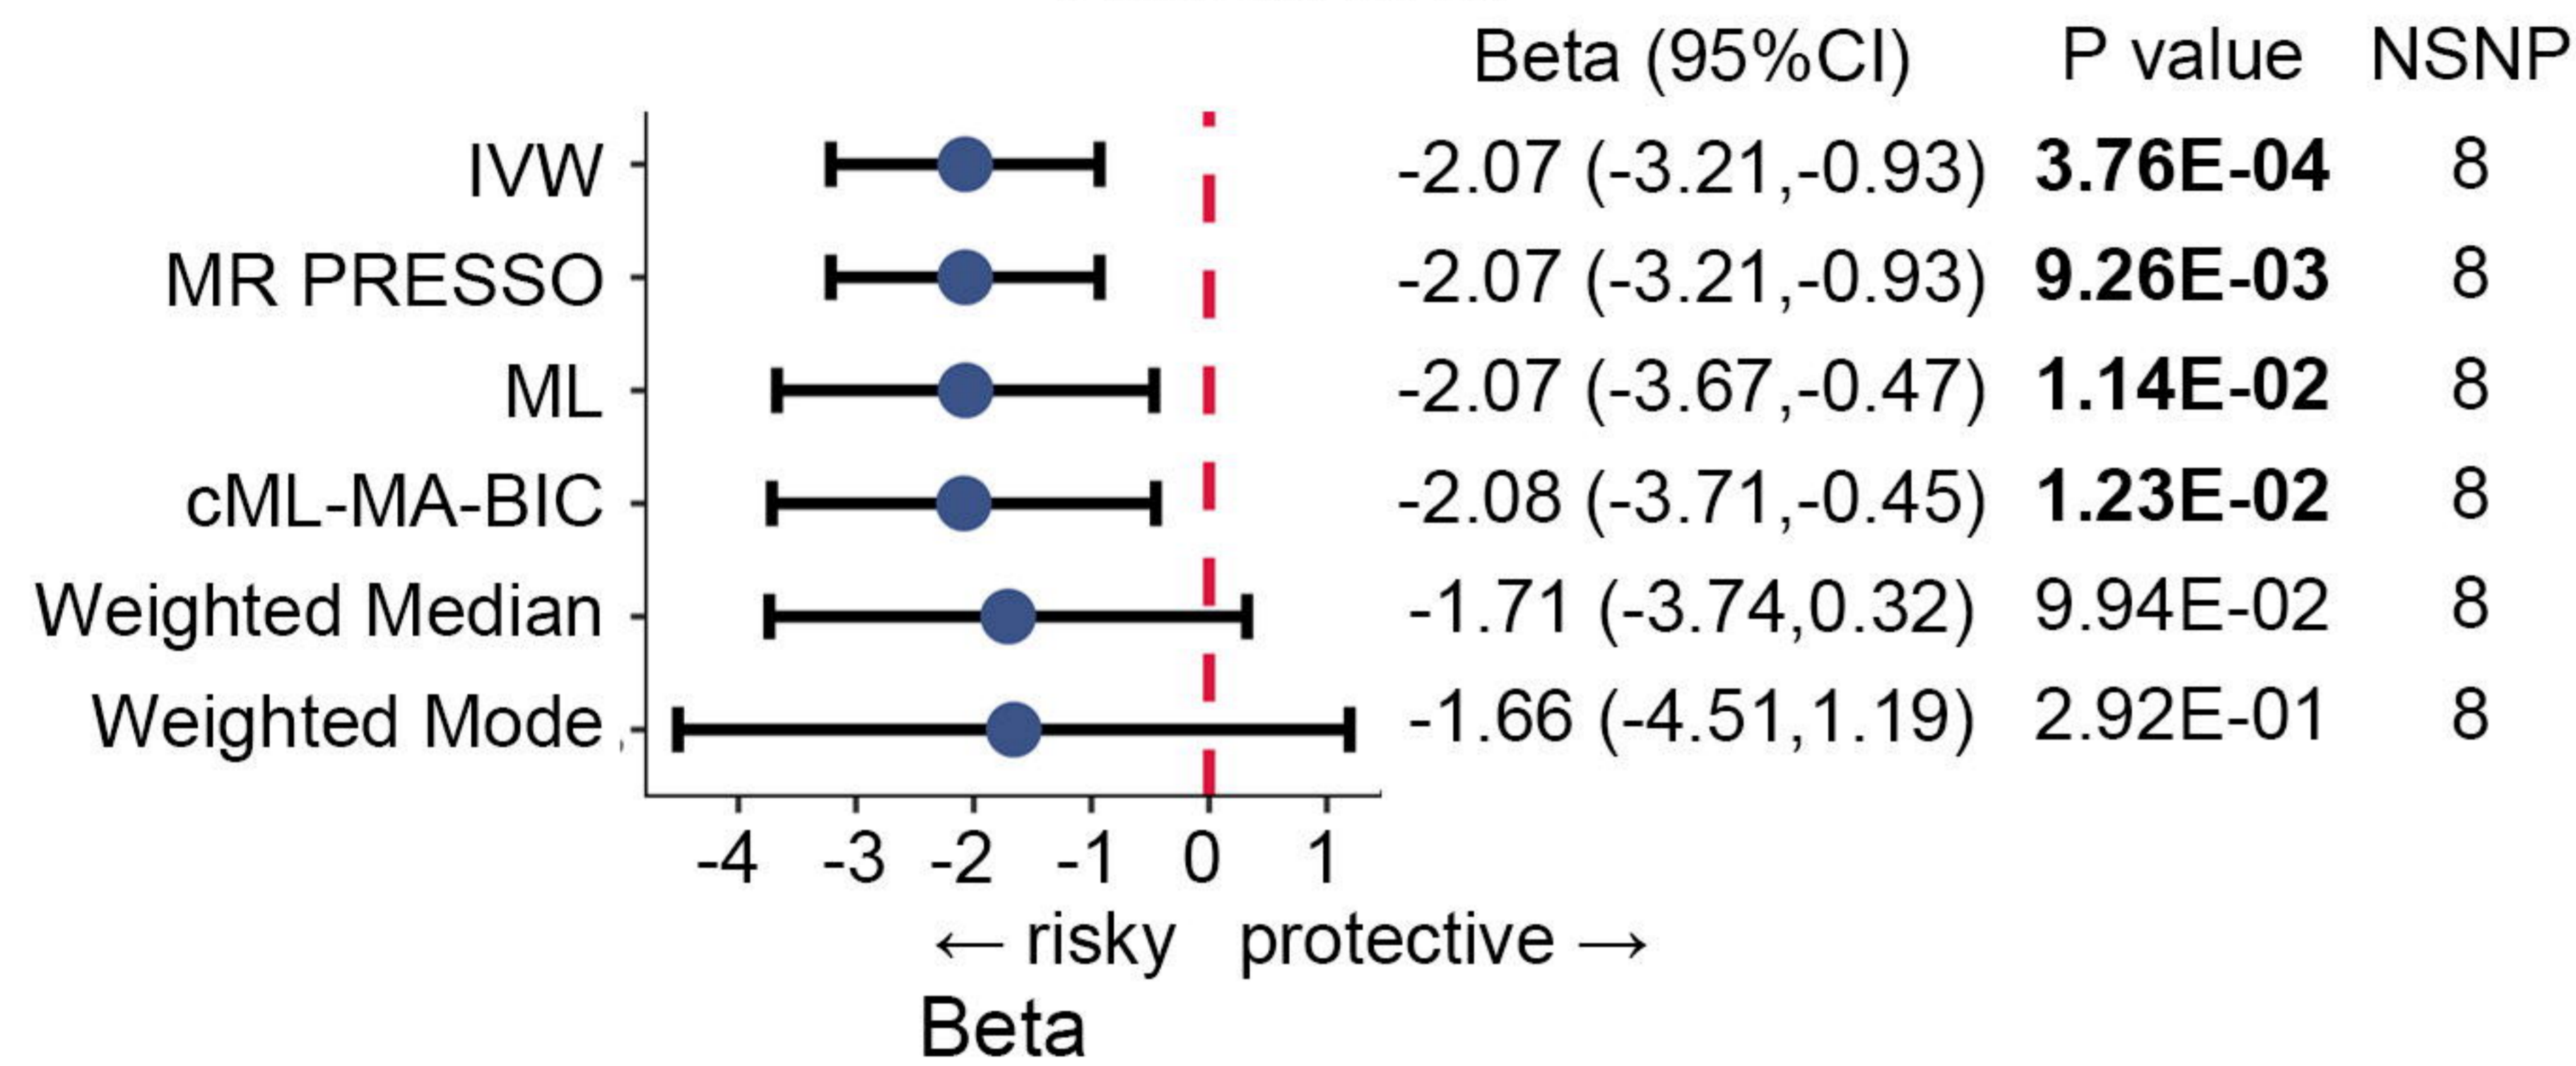

### *Ruminococcaceae* UCG004

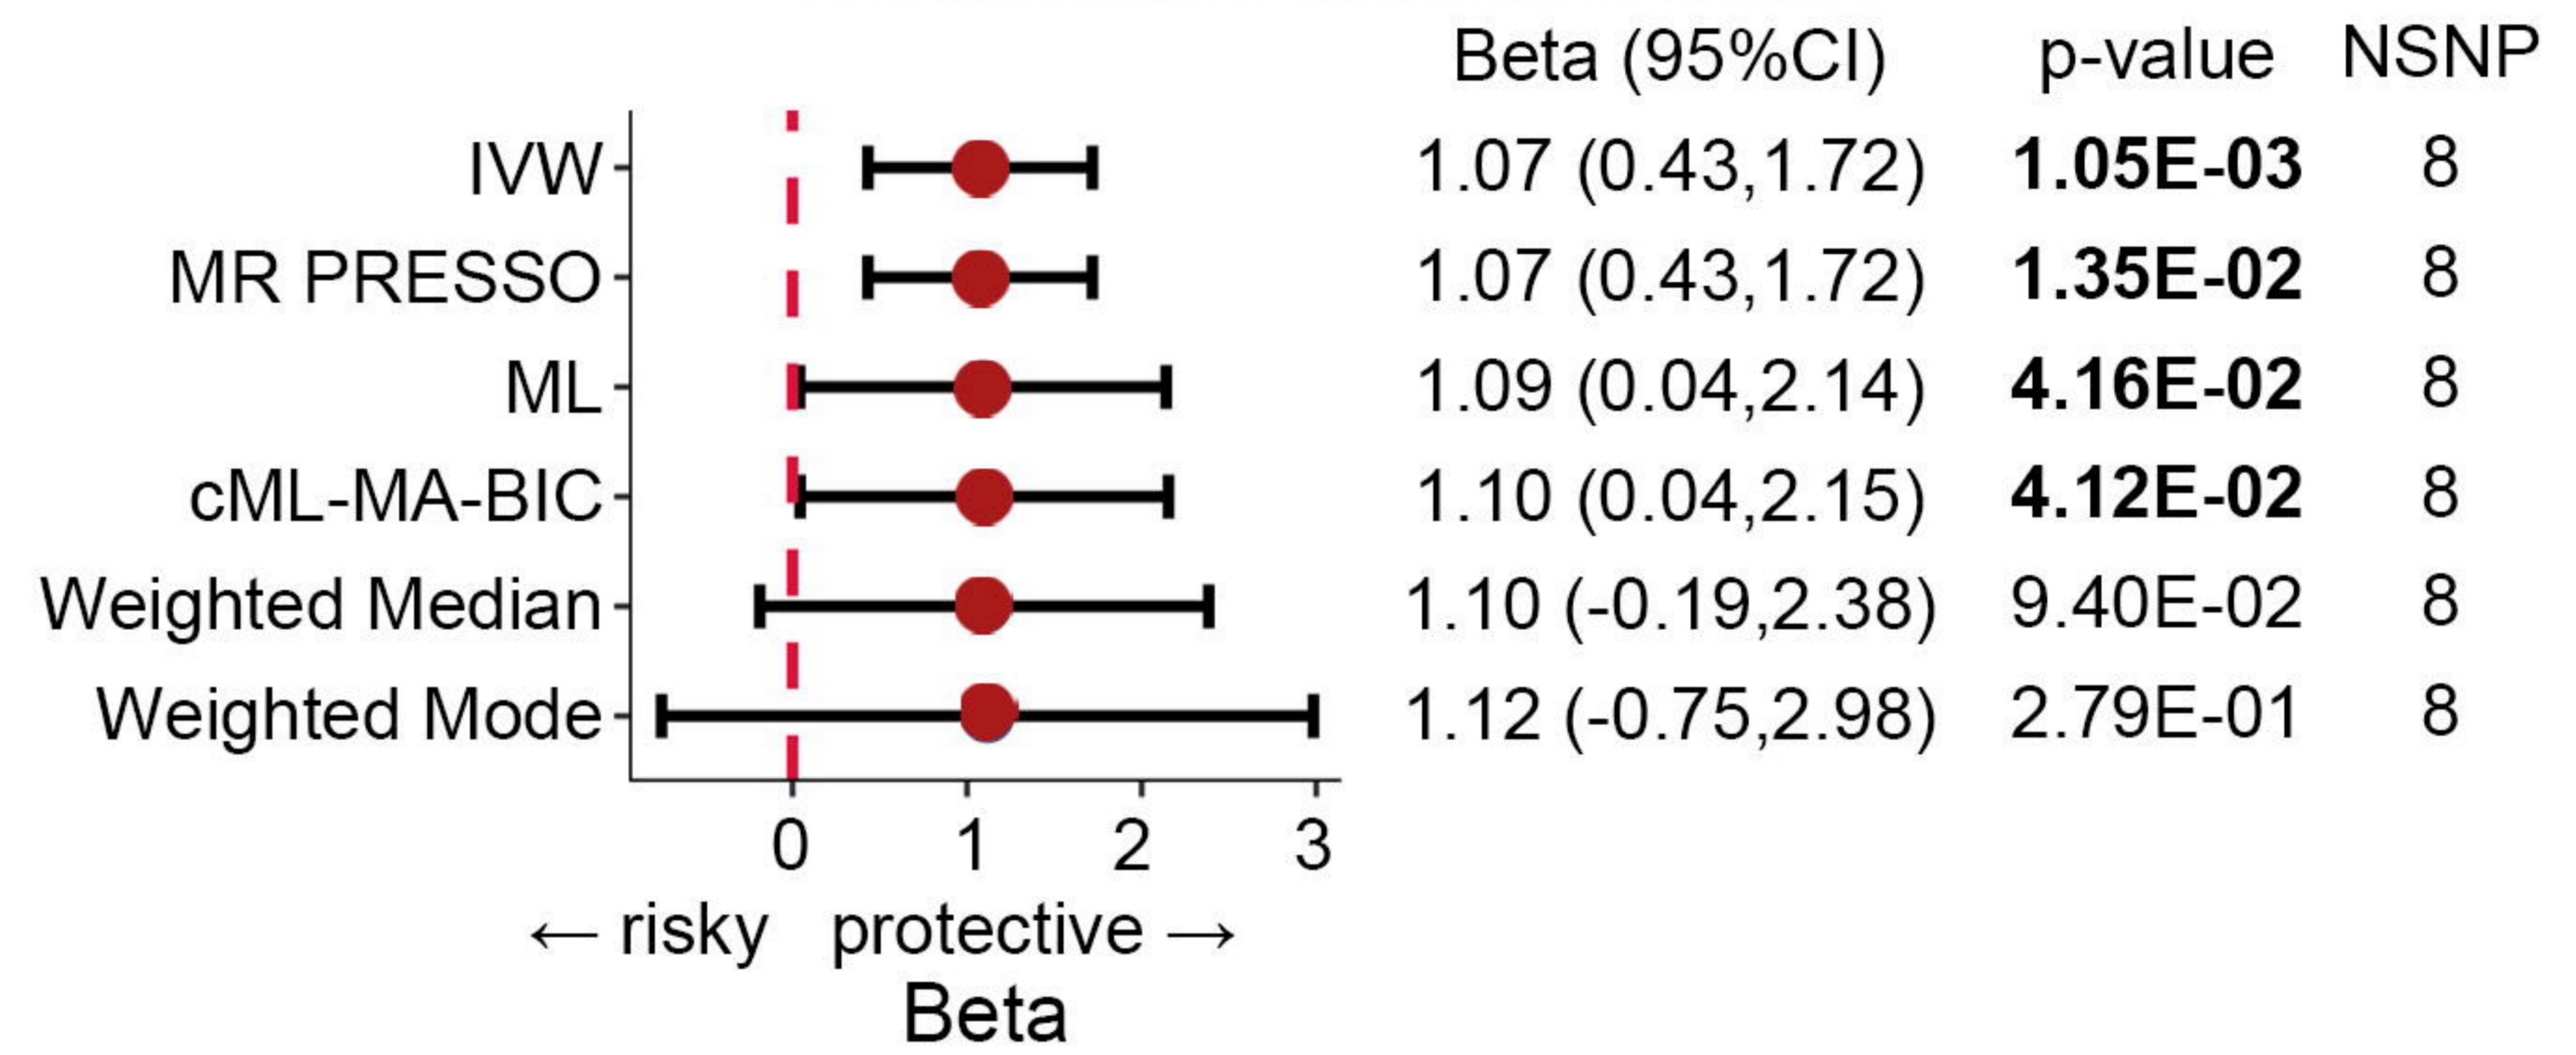

### *Defluviitaleaceae* UCG011

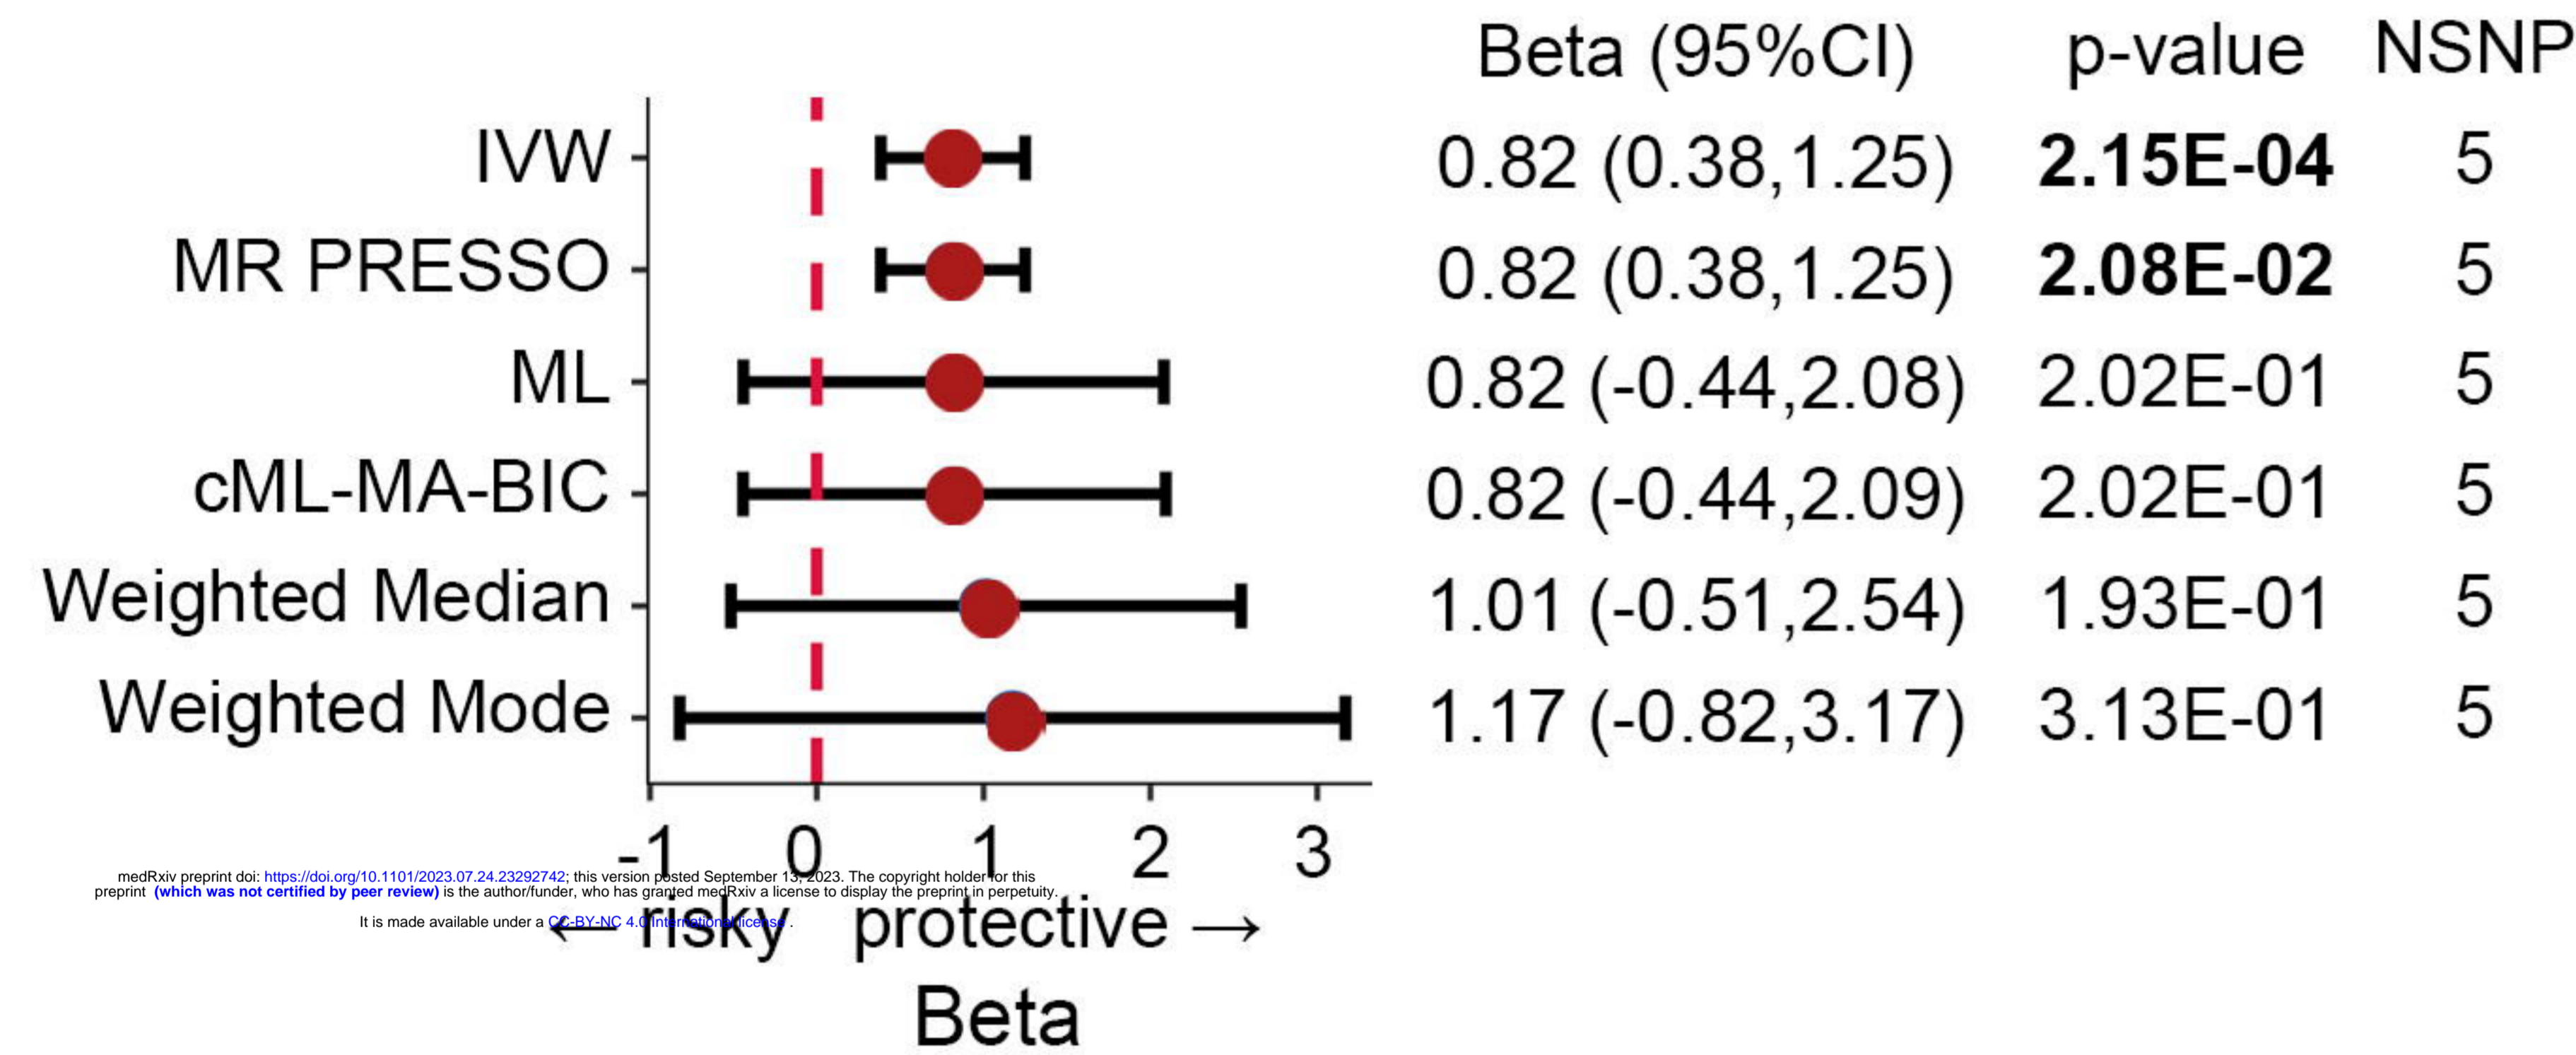

### *Eubacterium* (brachy group)

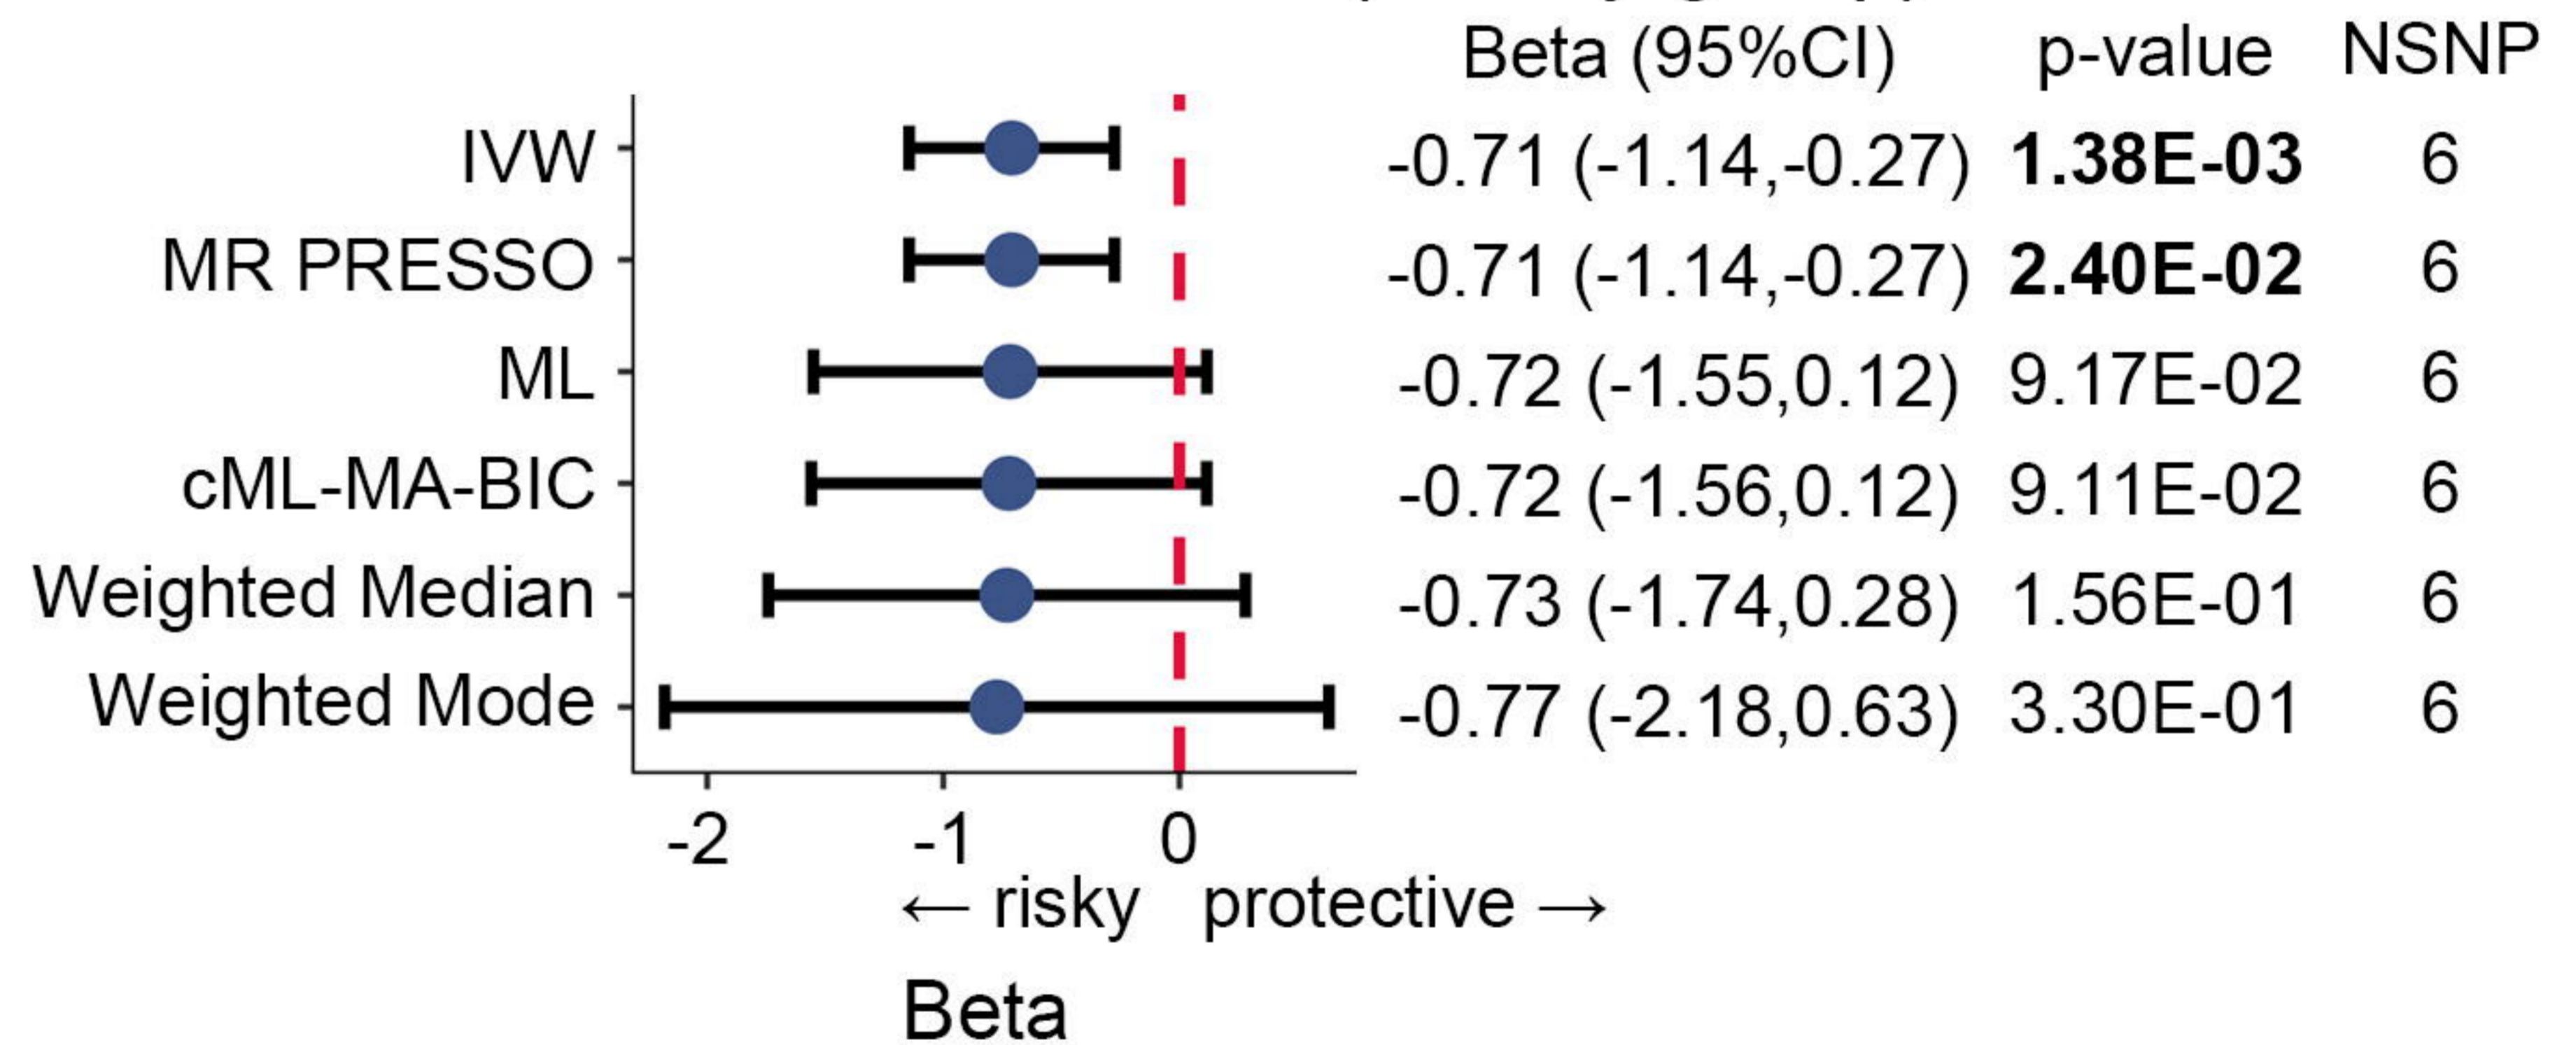

### *Peptococcus*

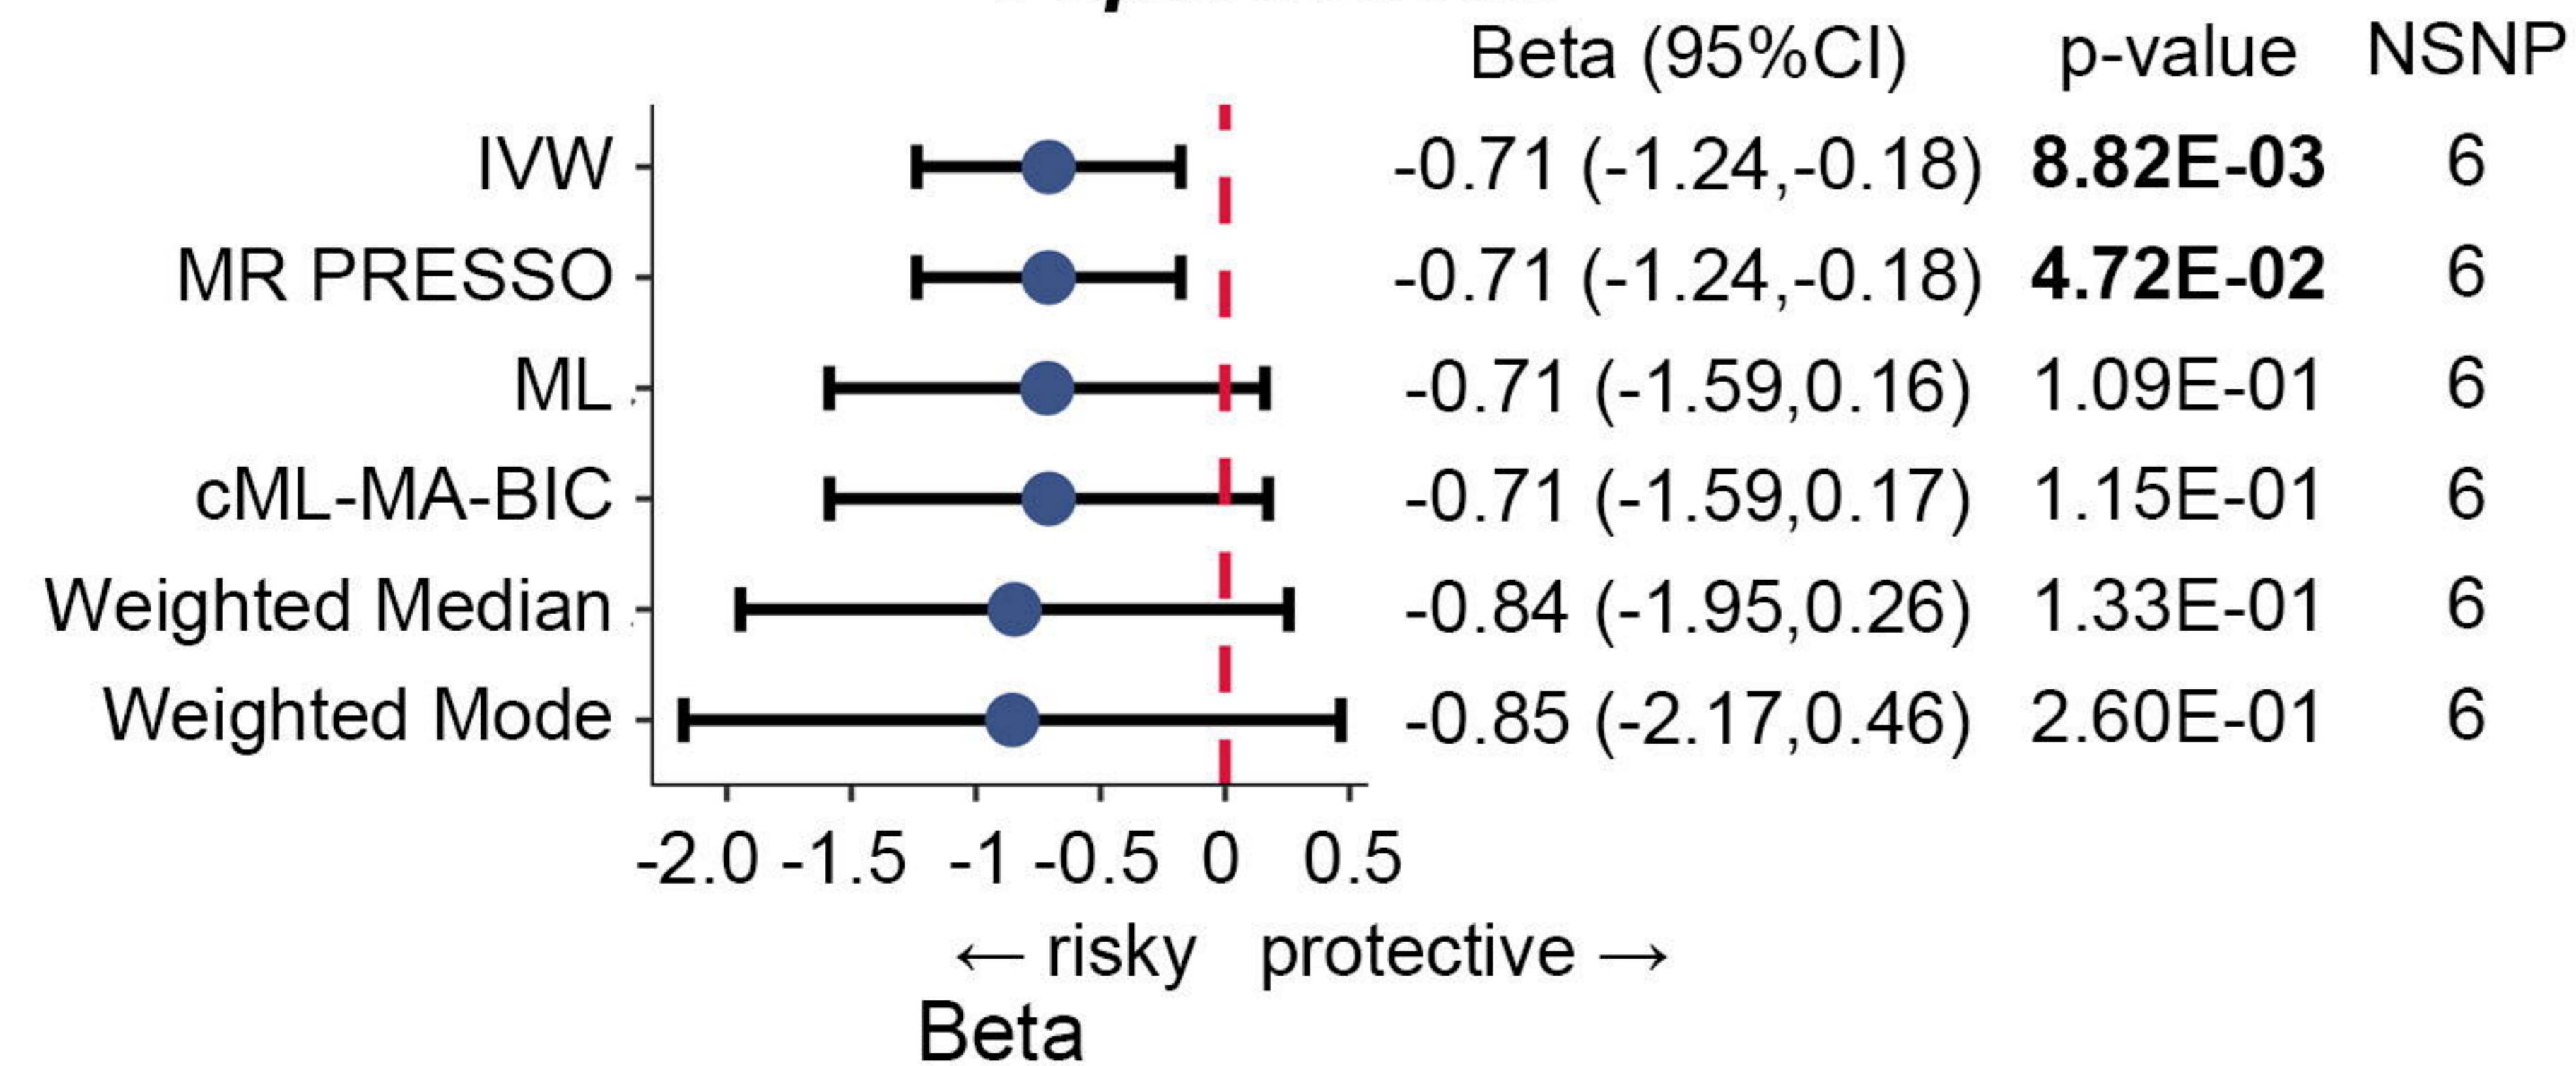



# High-grade irAEs

## Family level

### *Lachnospiraceae*

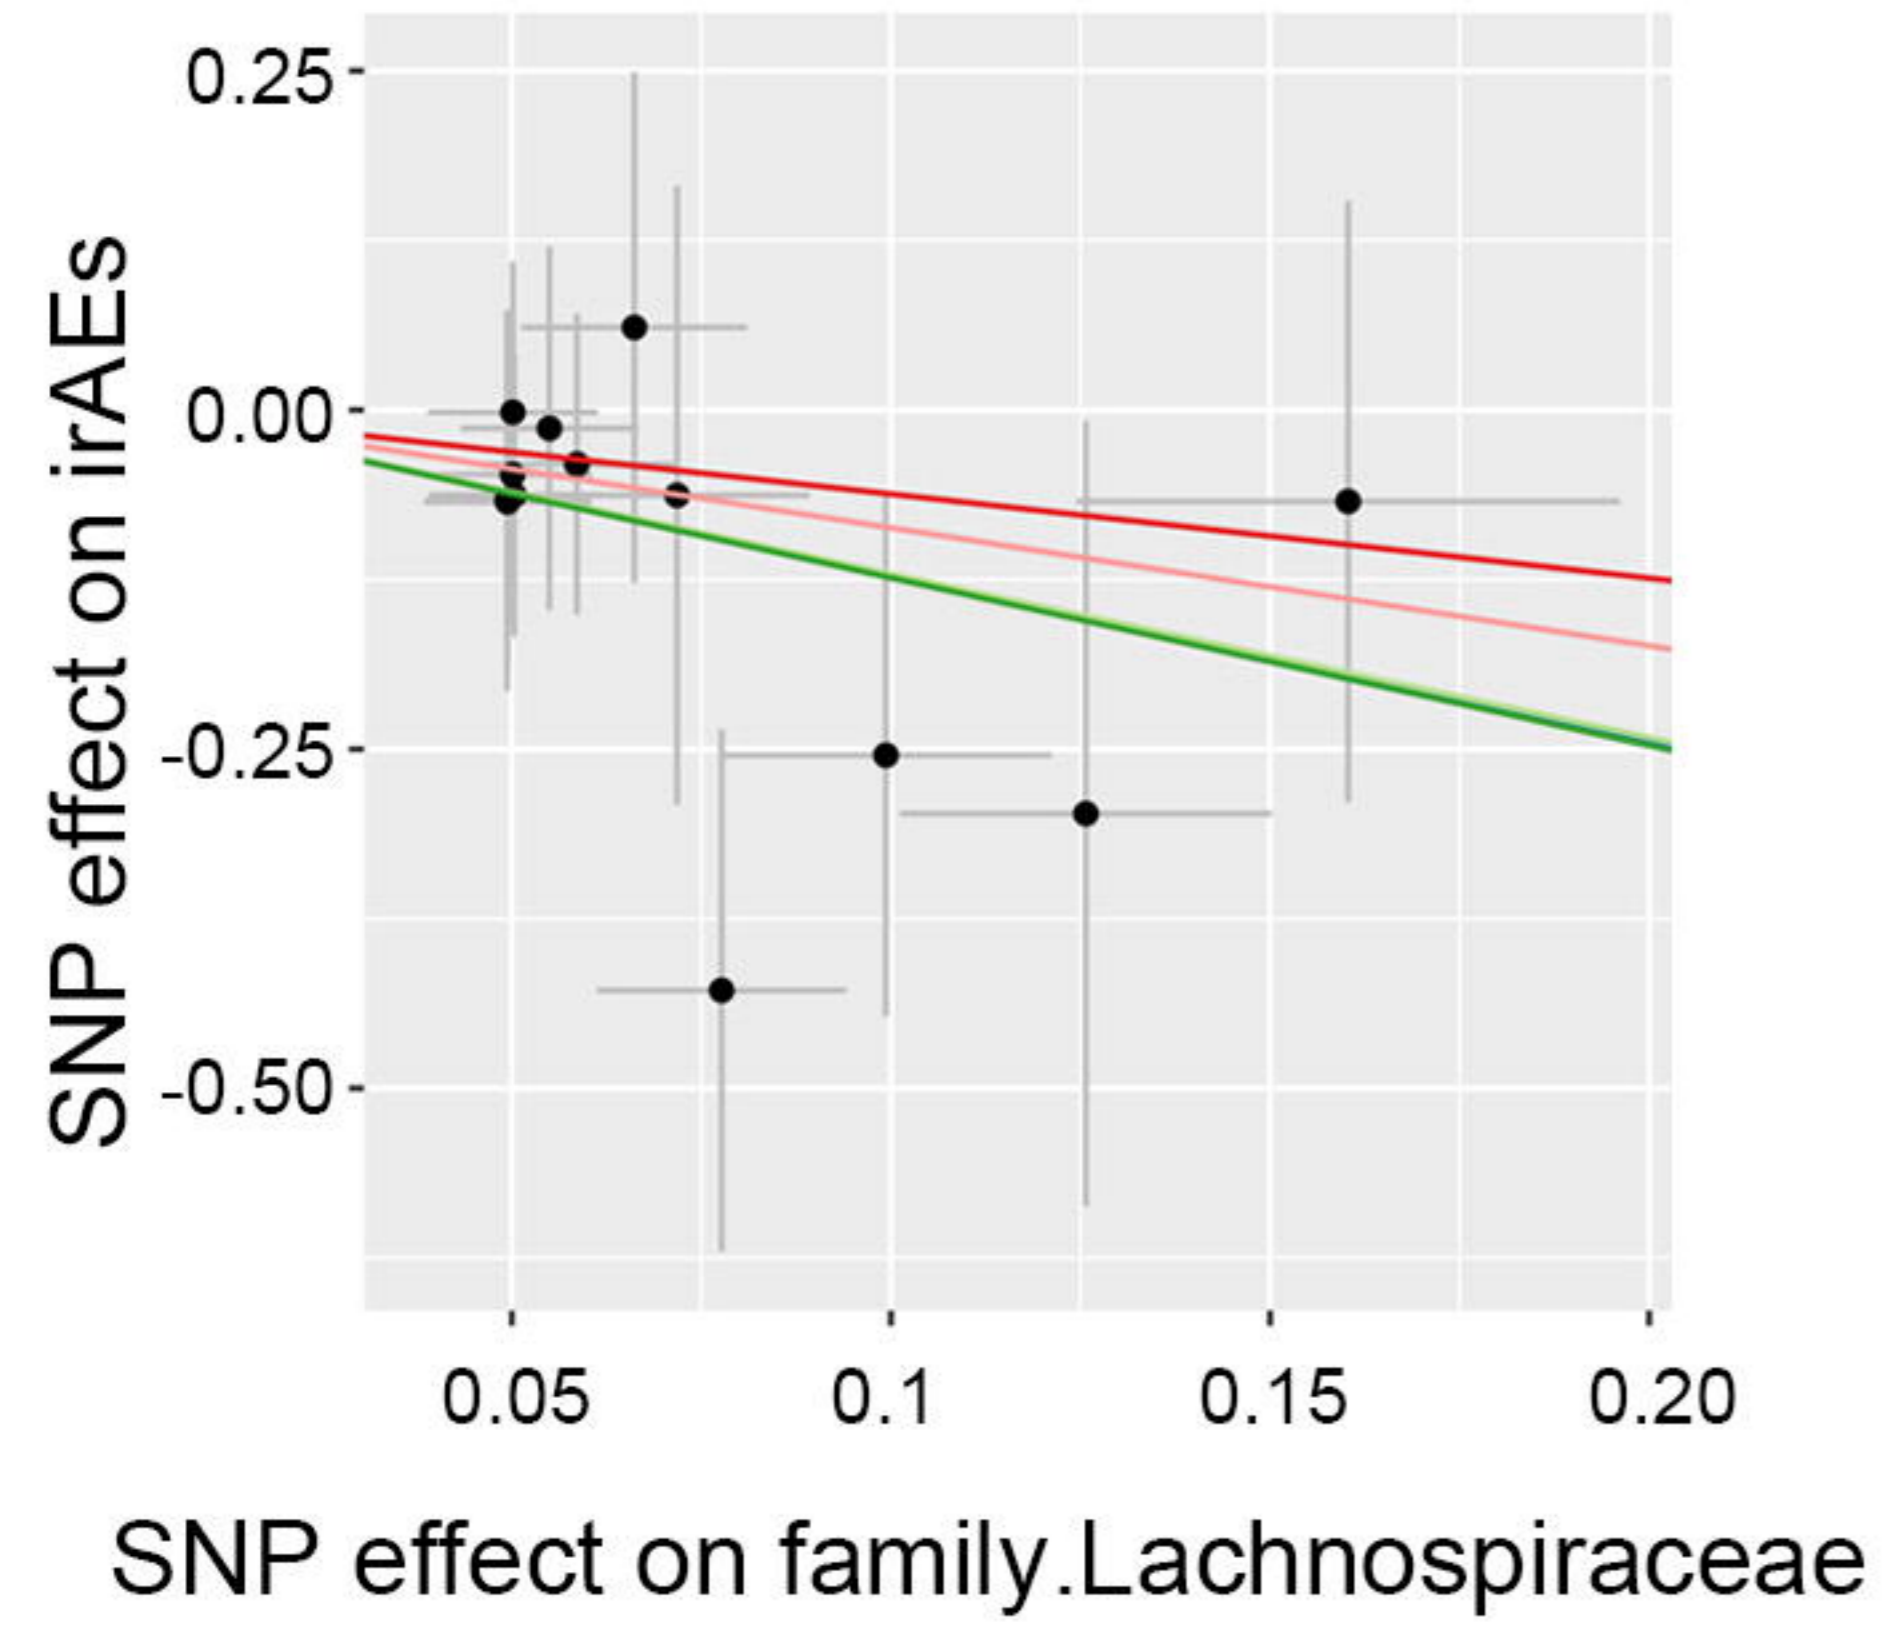

### *Verrucomicrobiaceae*

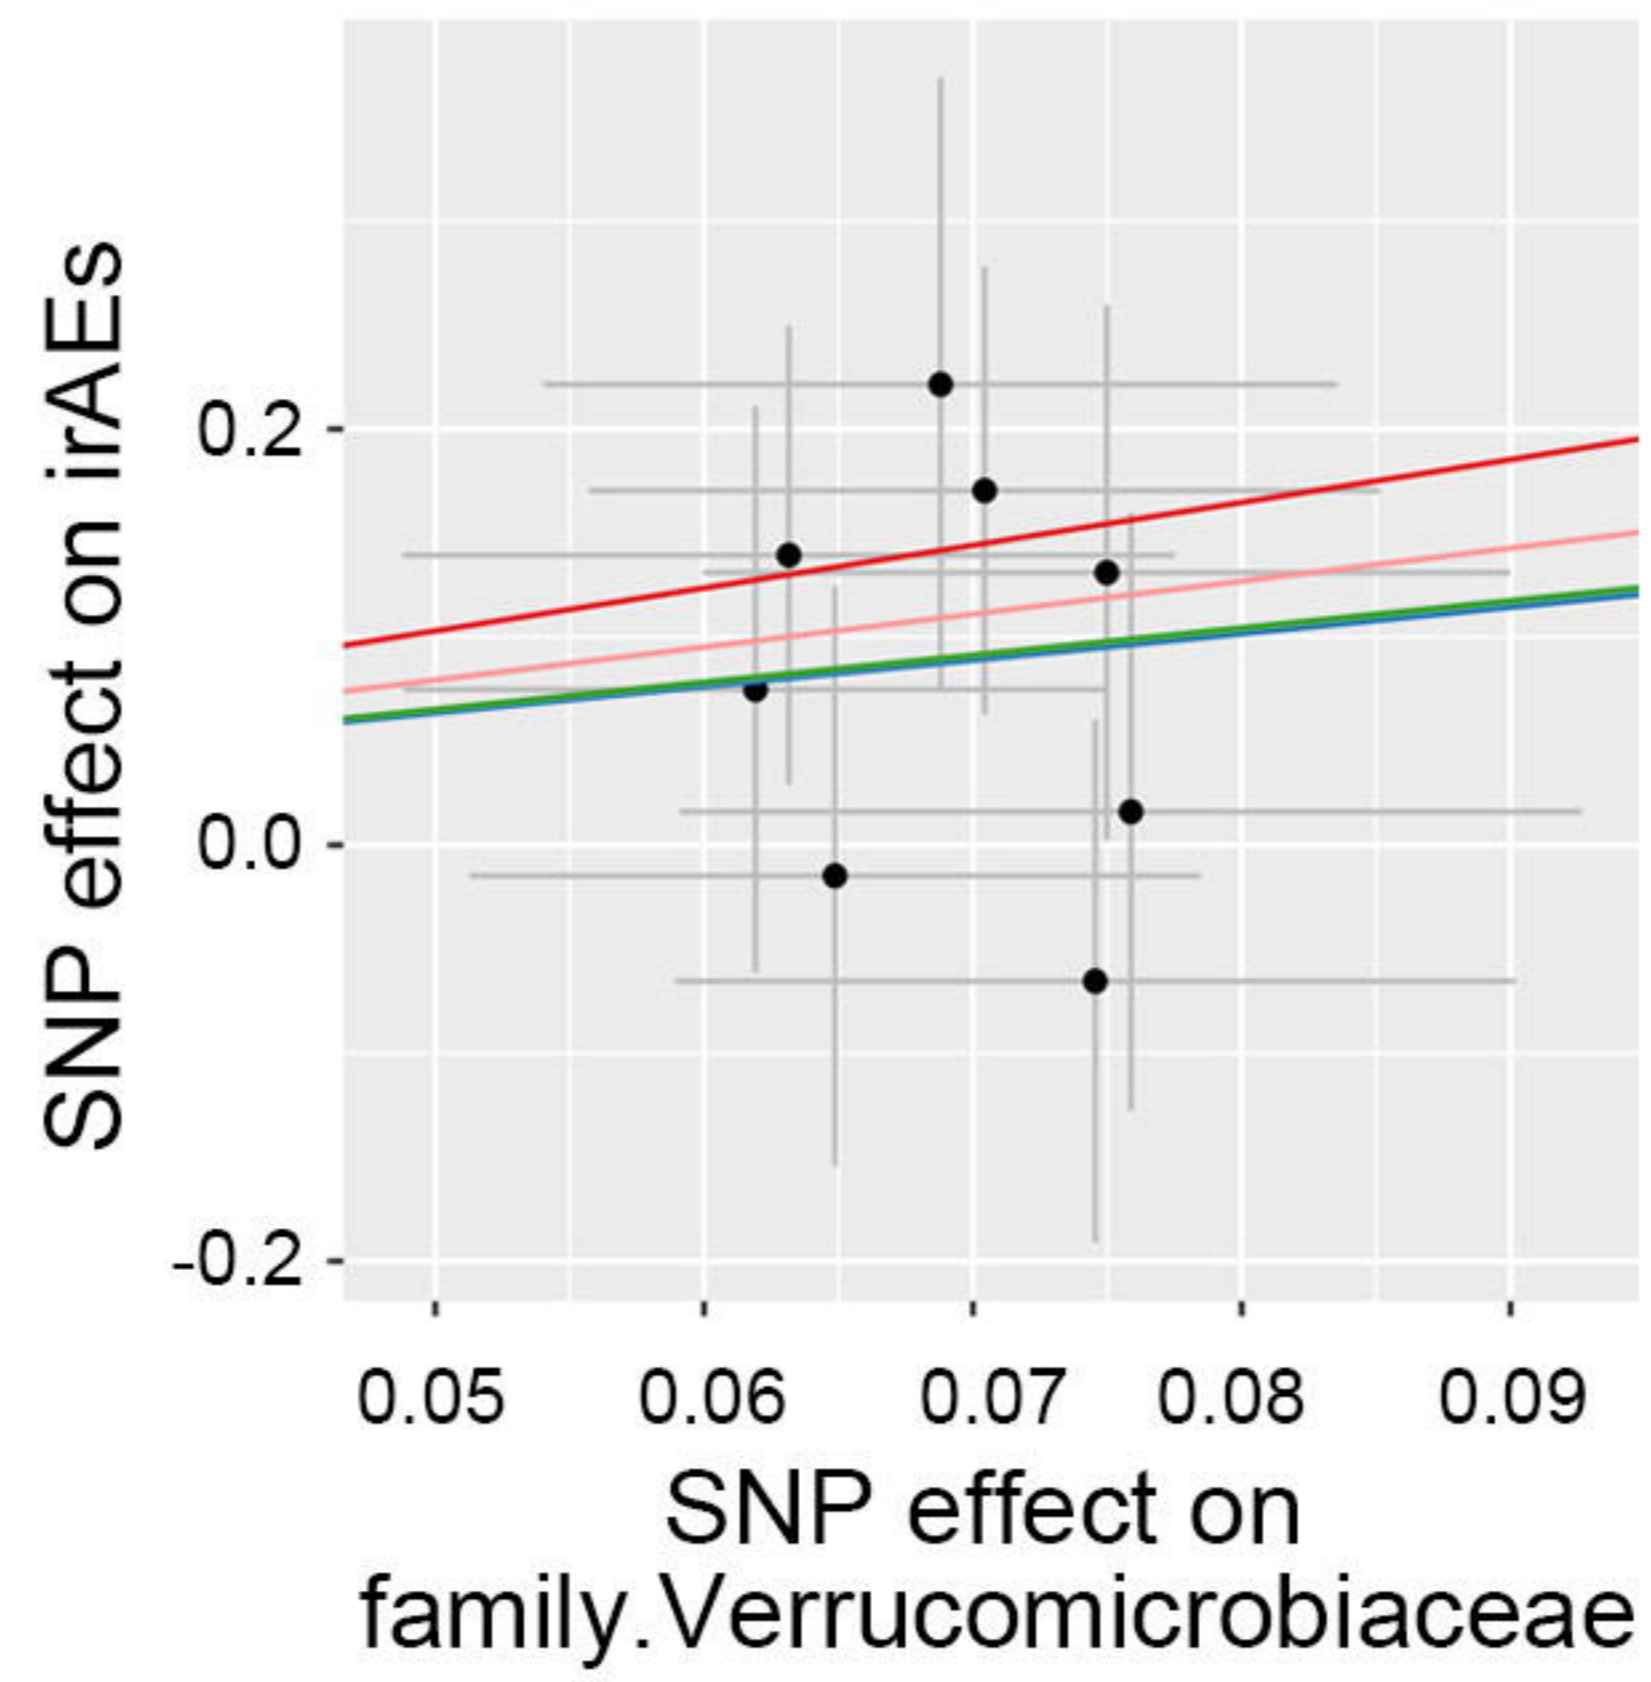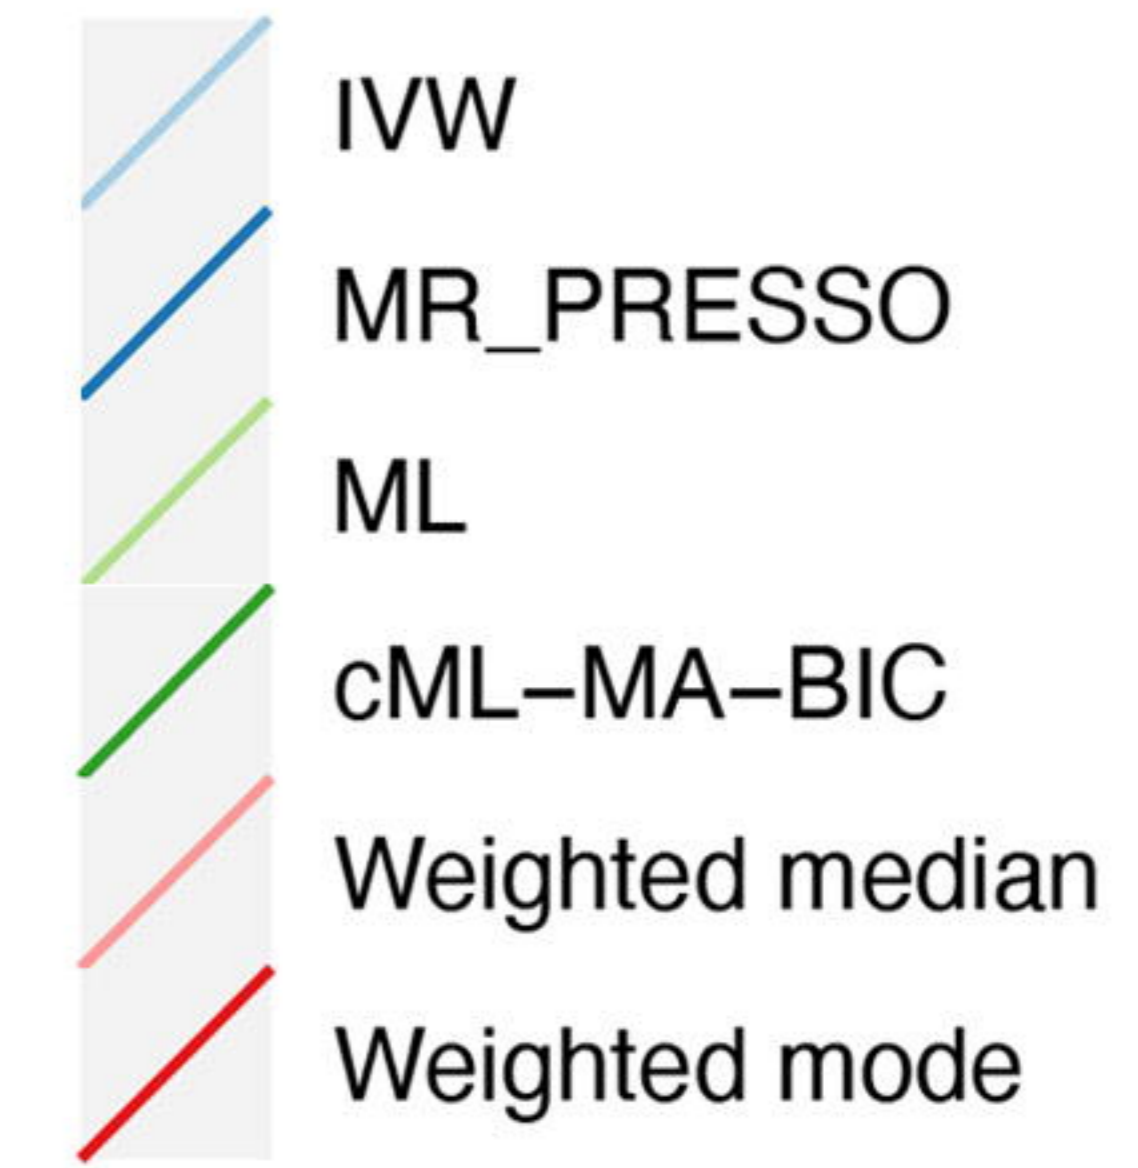

## Genus level

### *Ruminiclostridium6*

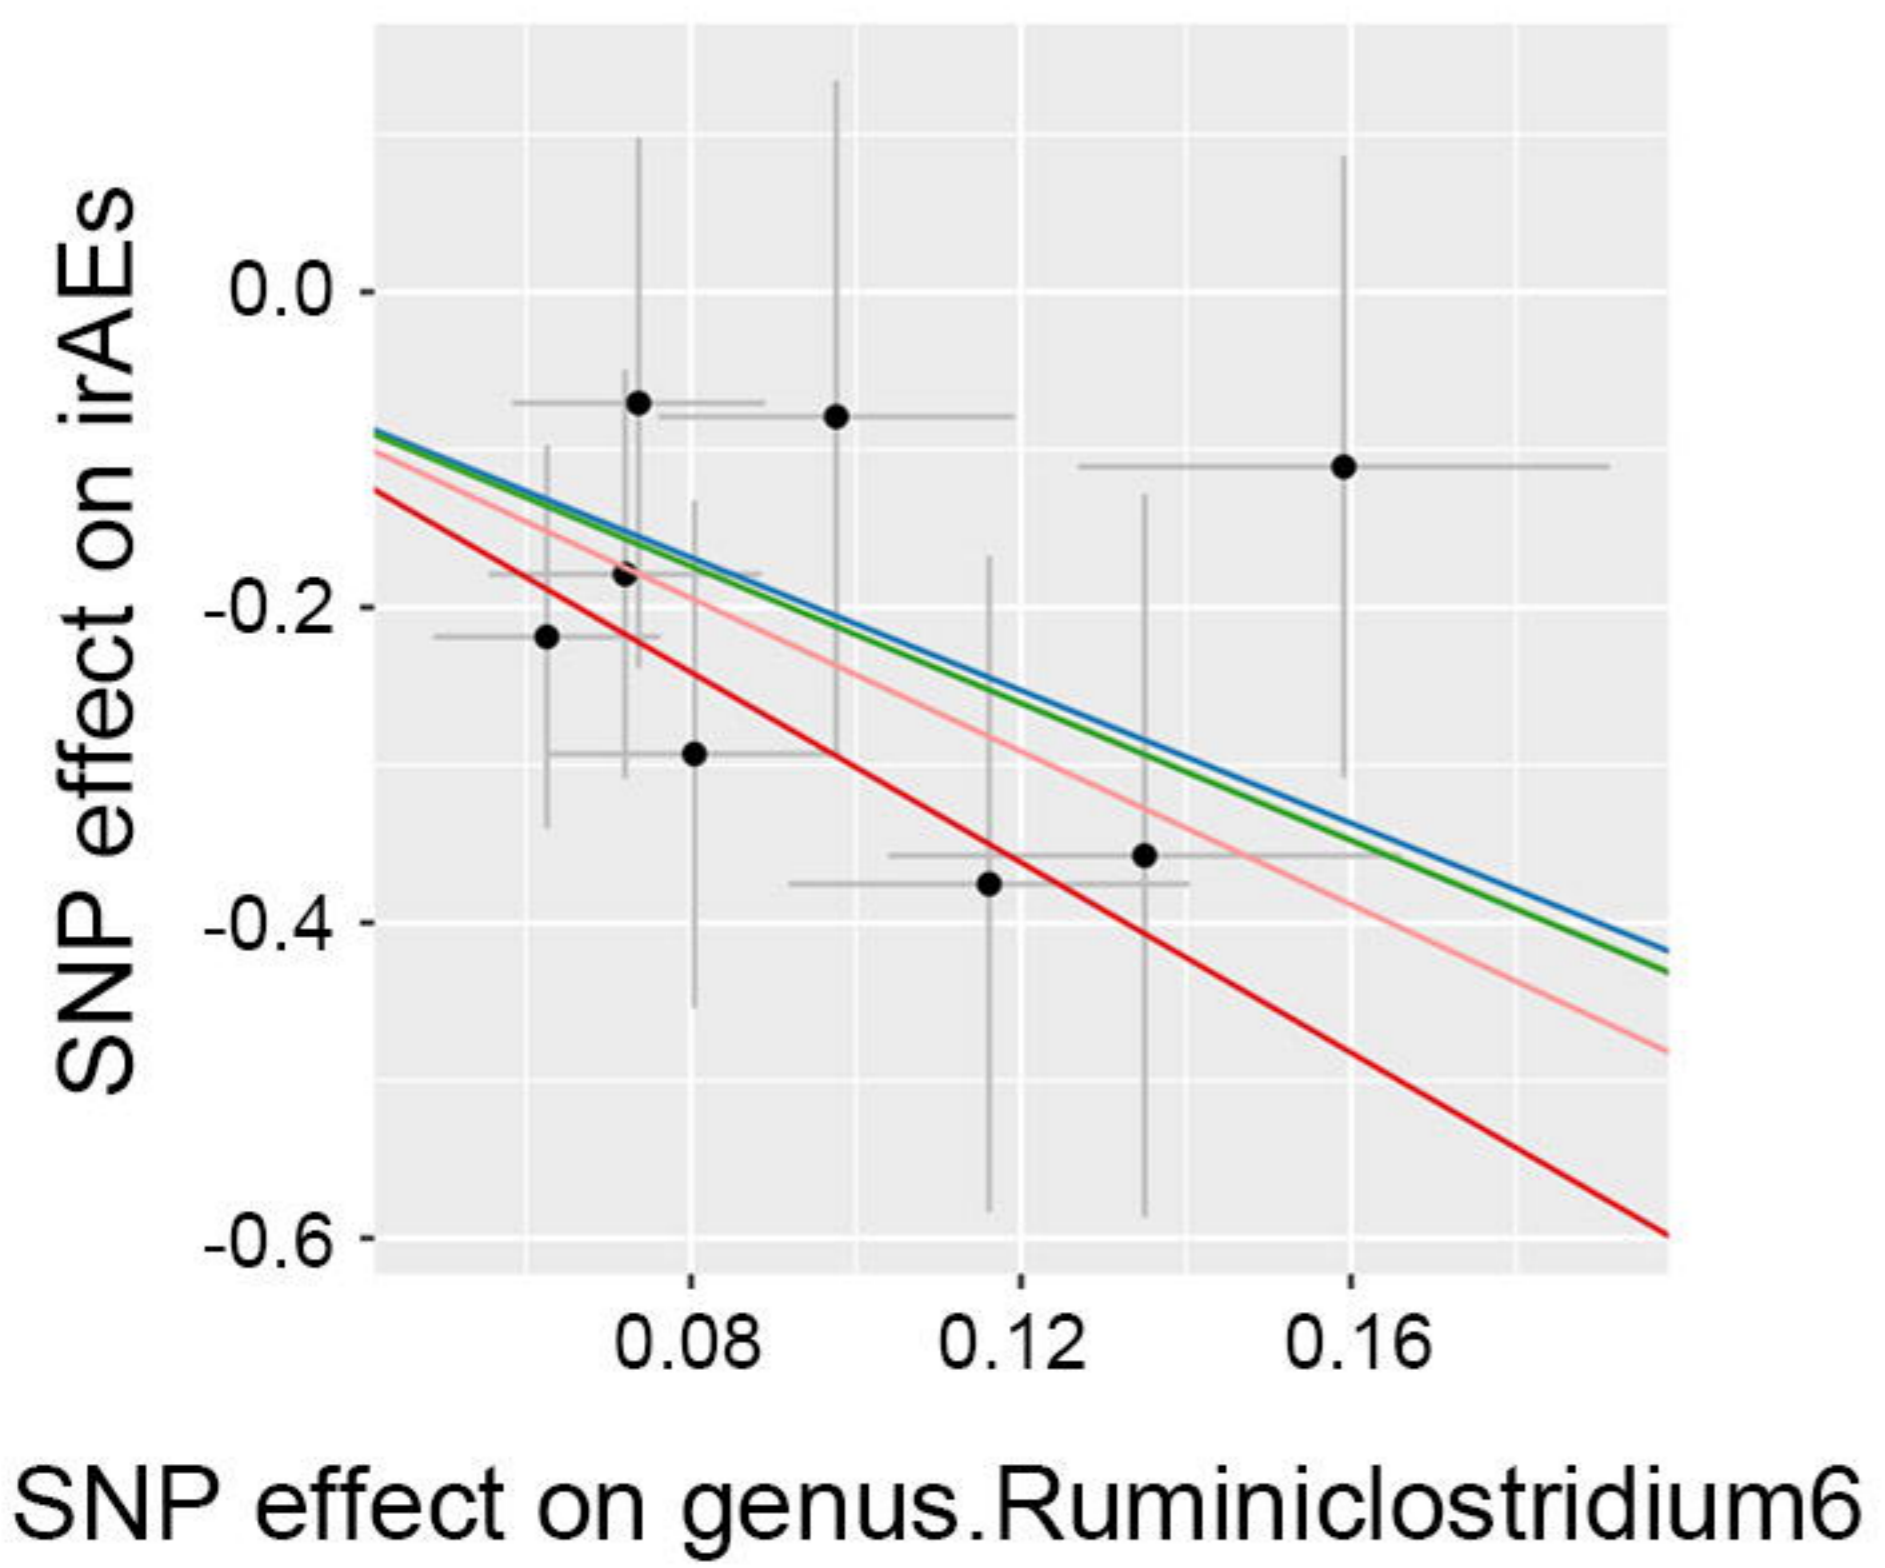

### *Coprococcus3*

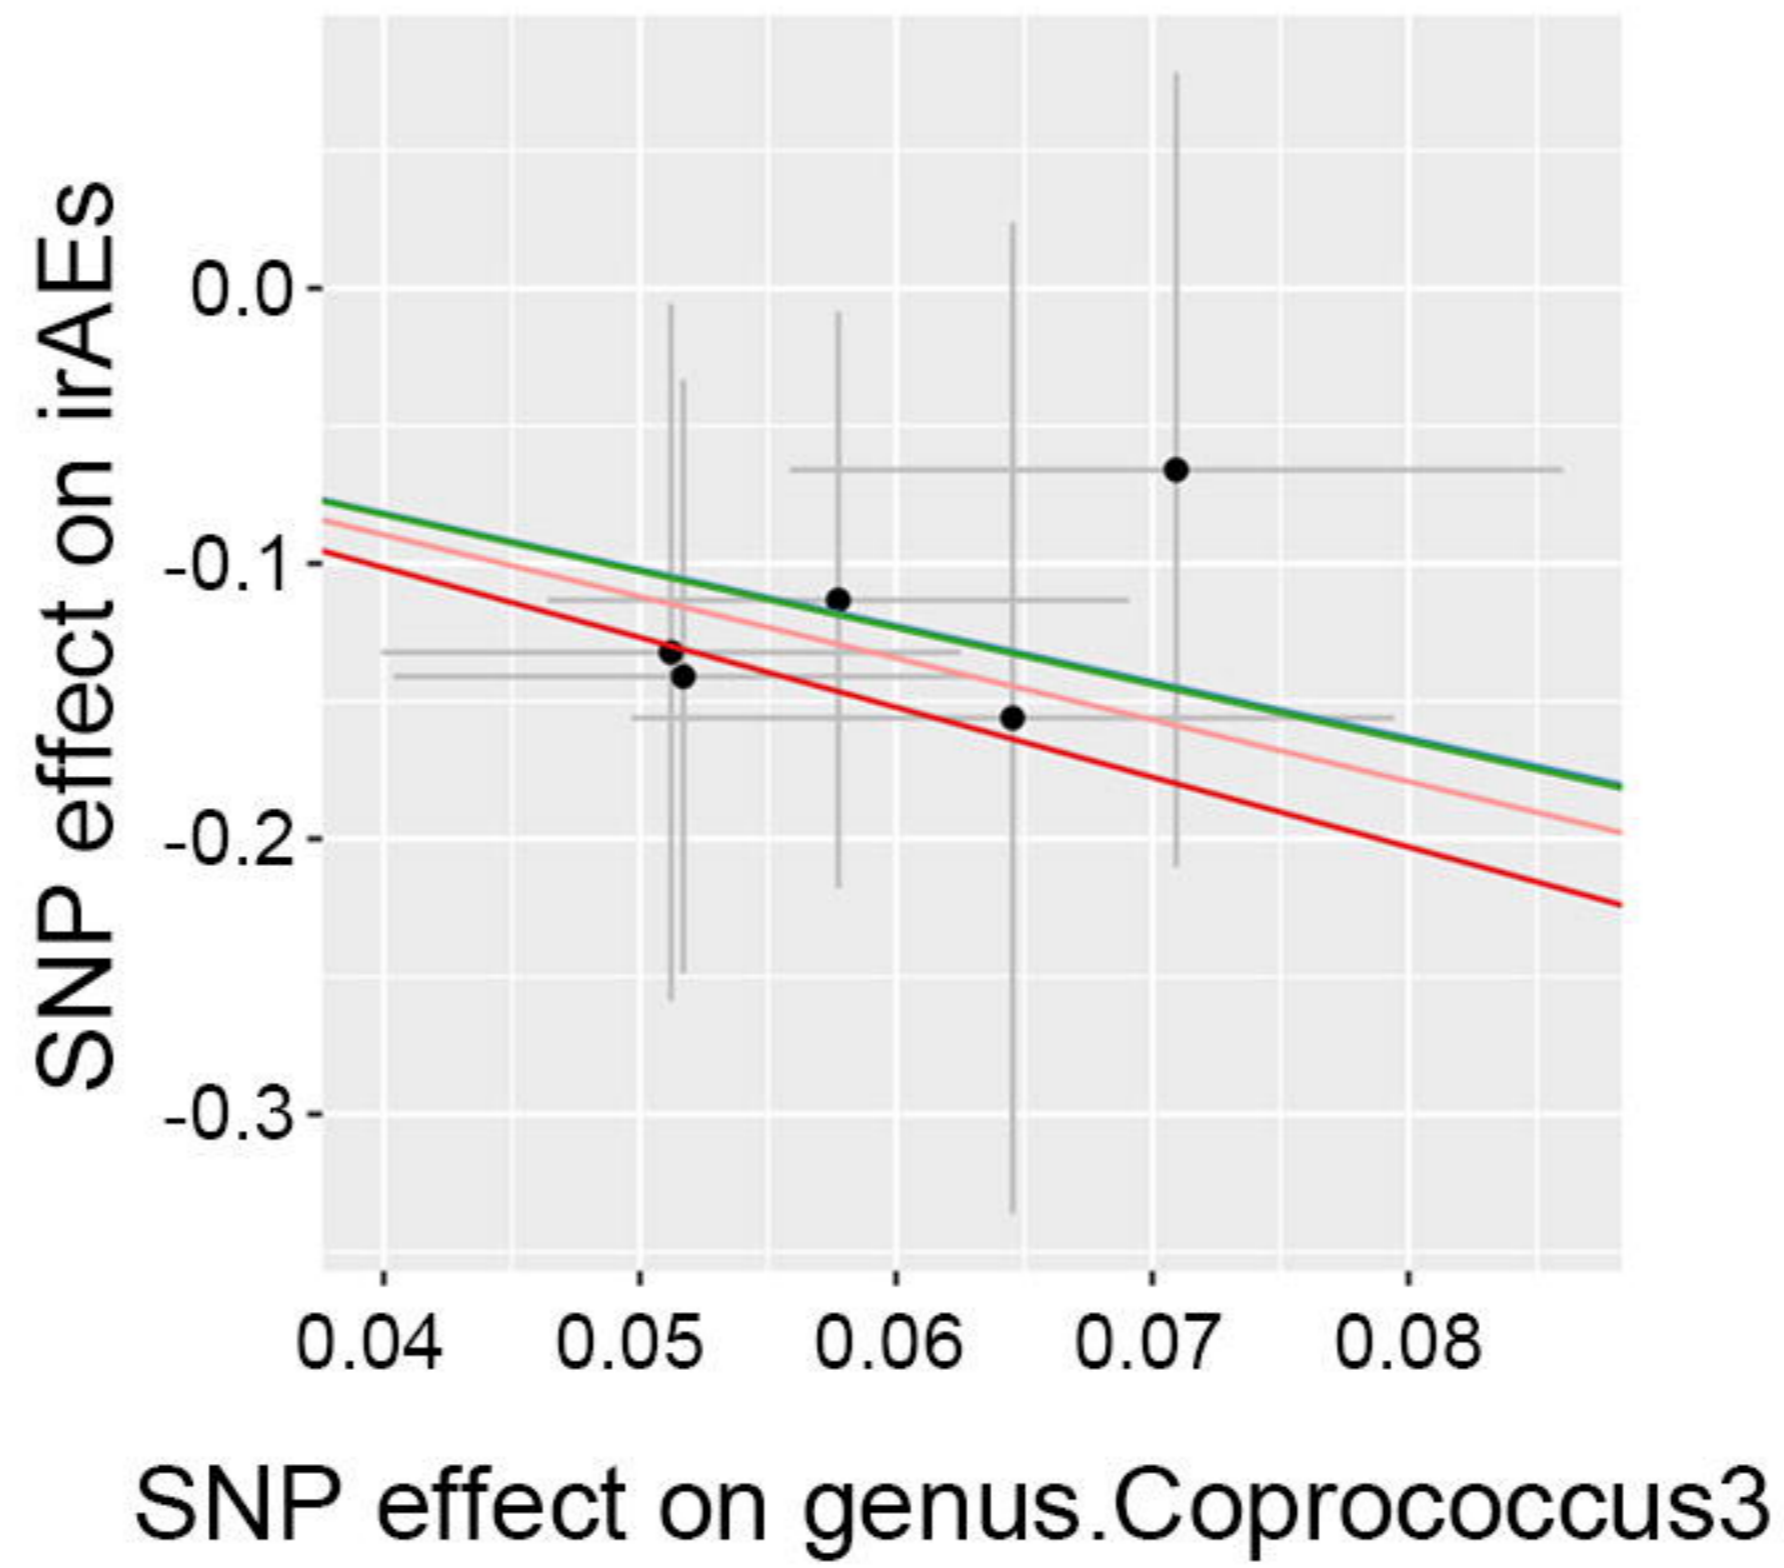

### *Anaerostipes*

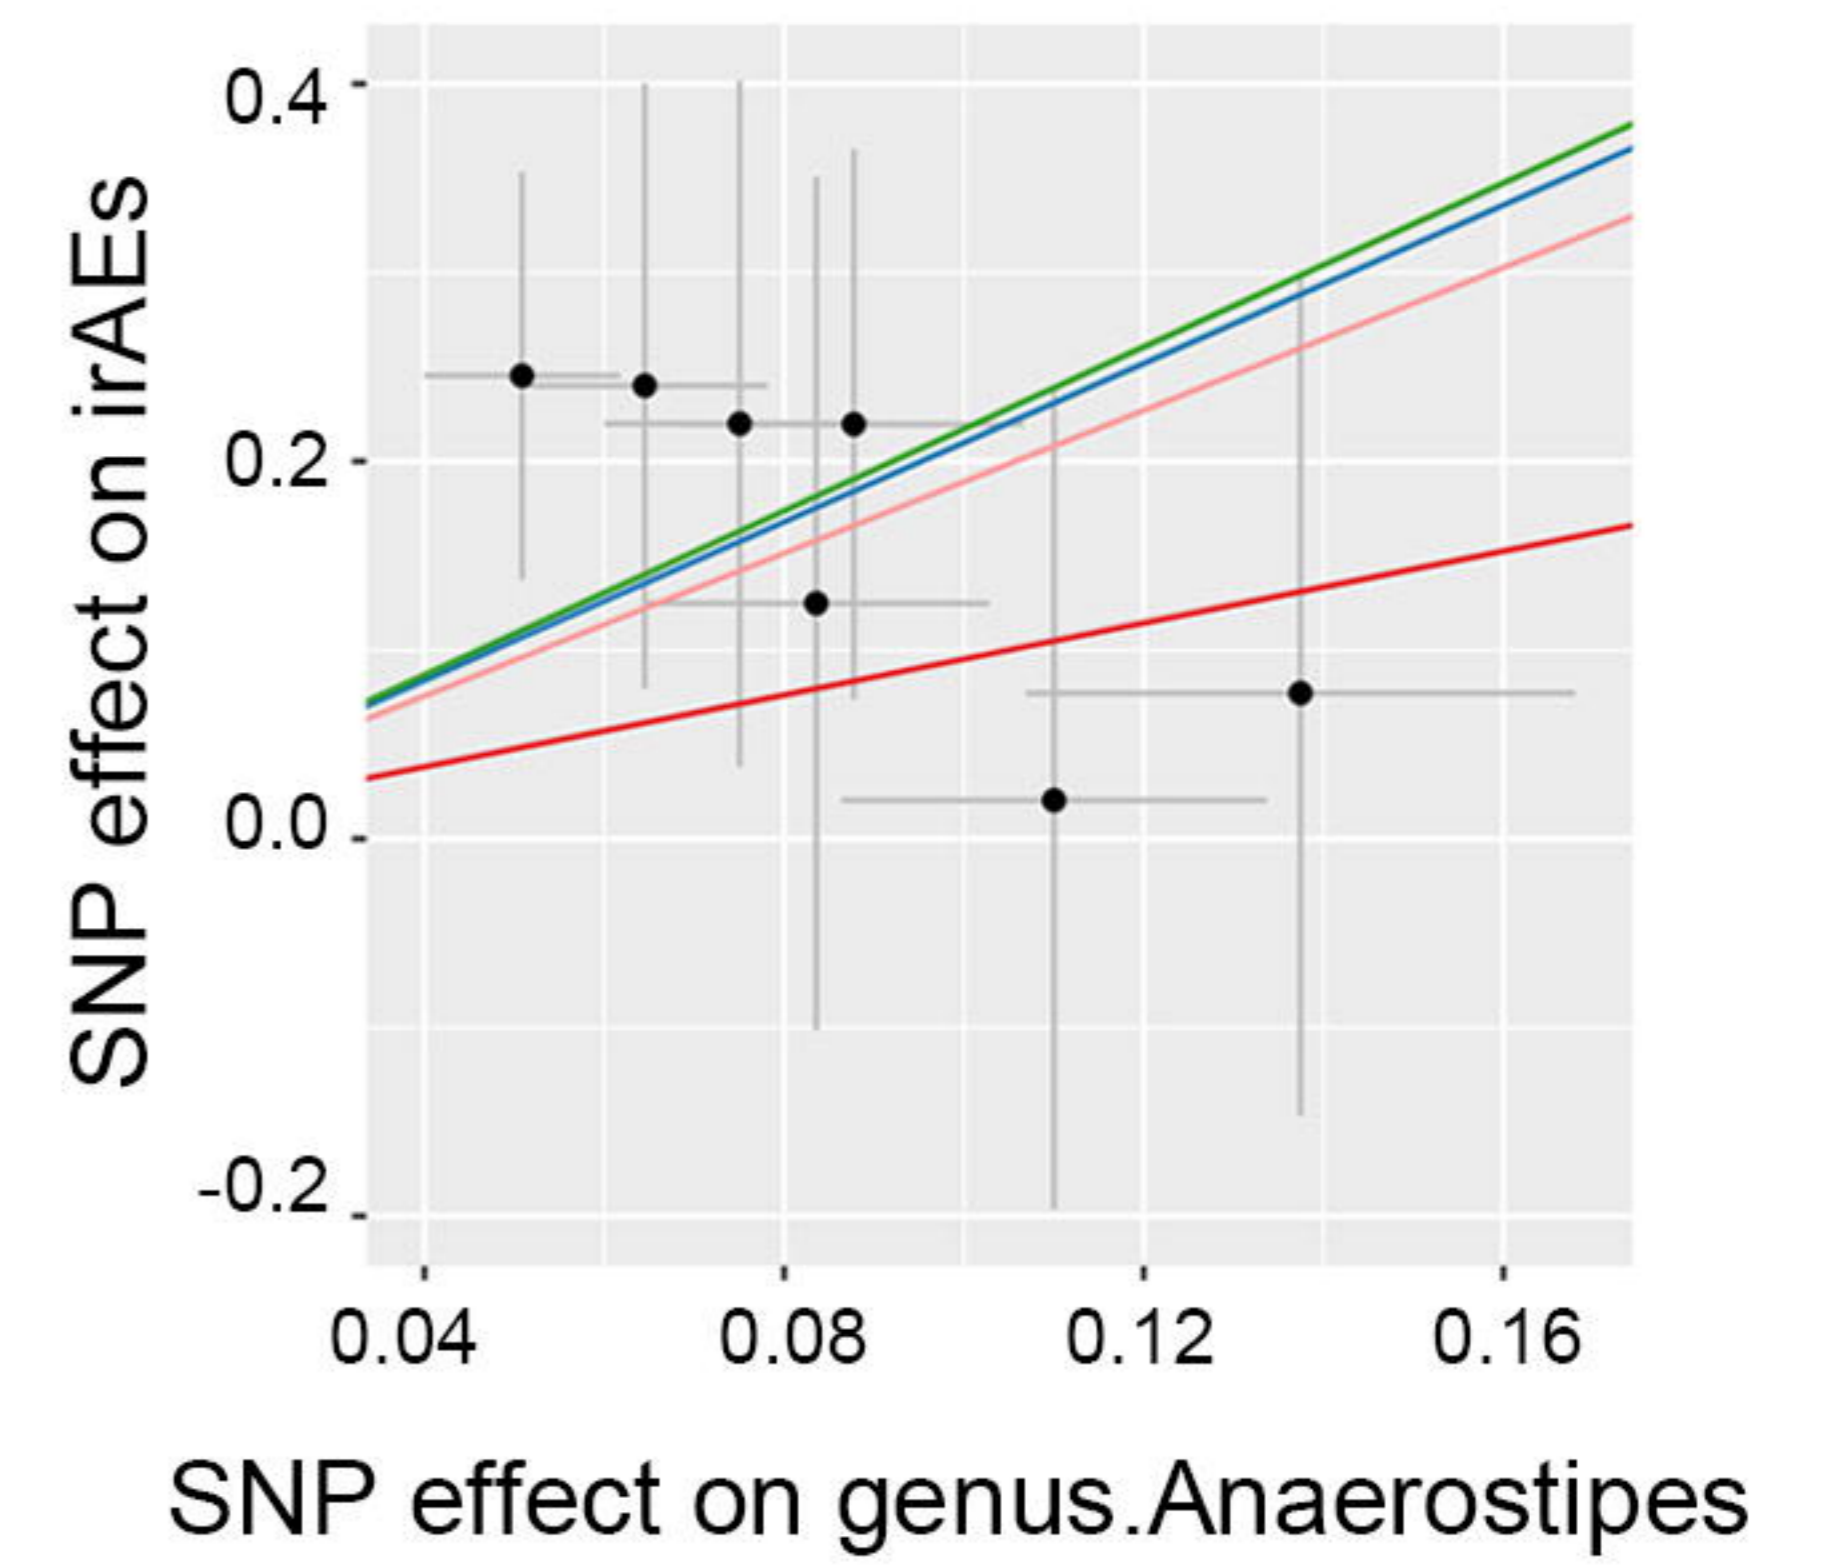

medRxiv preprint doi: <https://doi.org/10.1101/2023.07.24.23292742>; this version posted September 13, 2023. The copyright holder for this preprint (which was not certified by peer review) is the author/funder, who has granted medRxiv a license to display the preprint in perpetuity. It is made available under a [CC-BY-NC 4.0 International license](https://creativecommons.org/licenses/by-nc/4.0/).

### *Akkermansia*

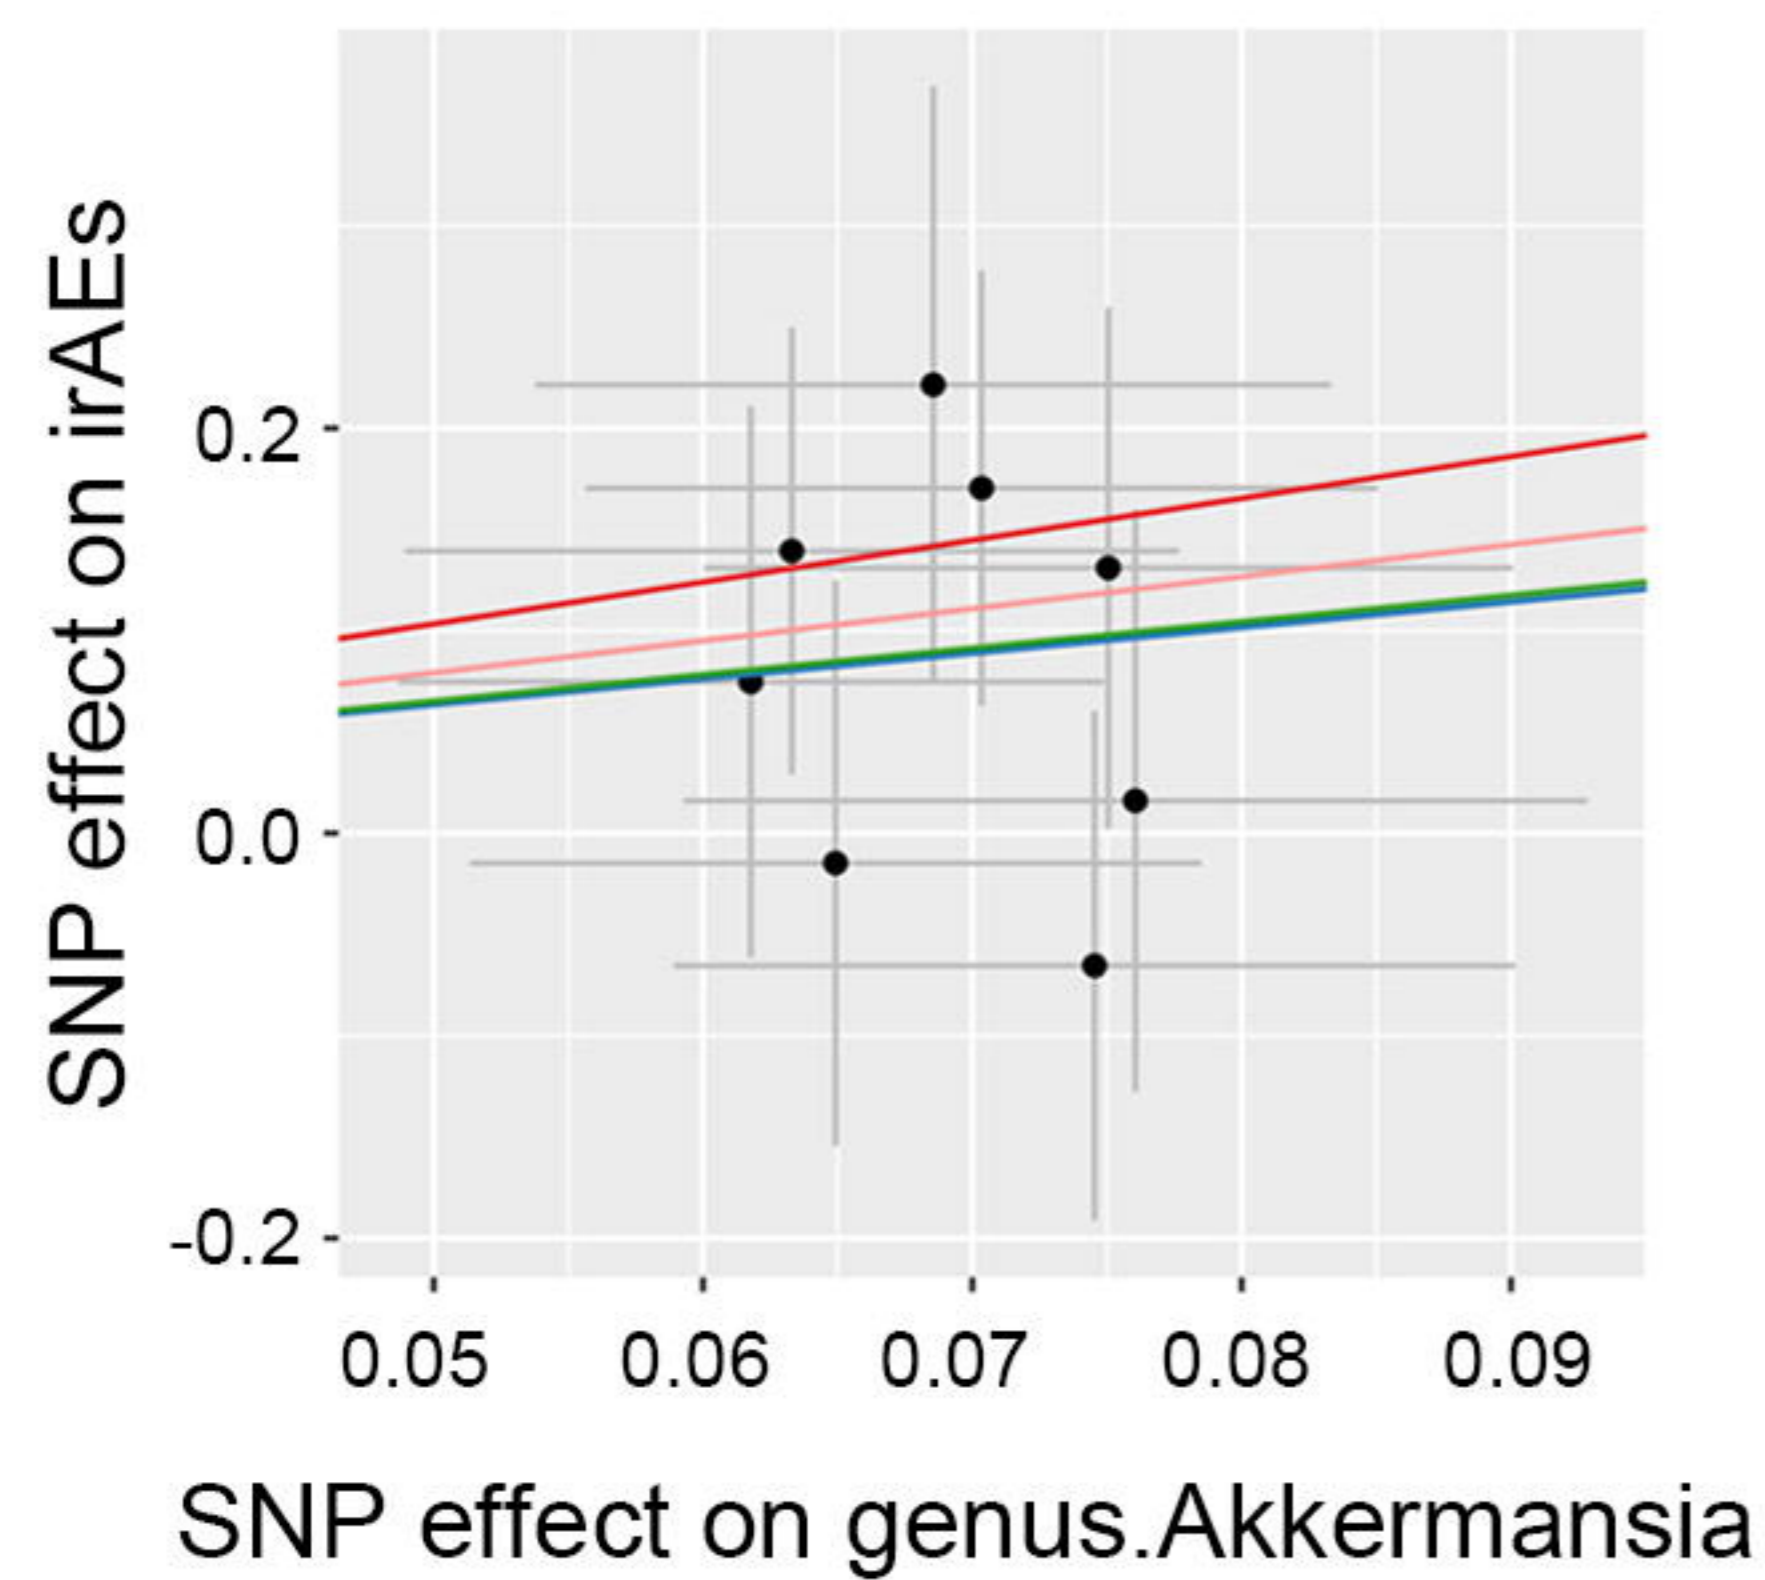

### *Collinsella*

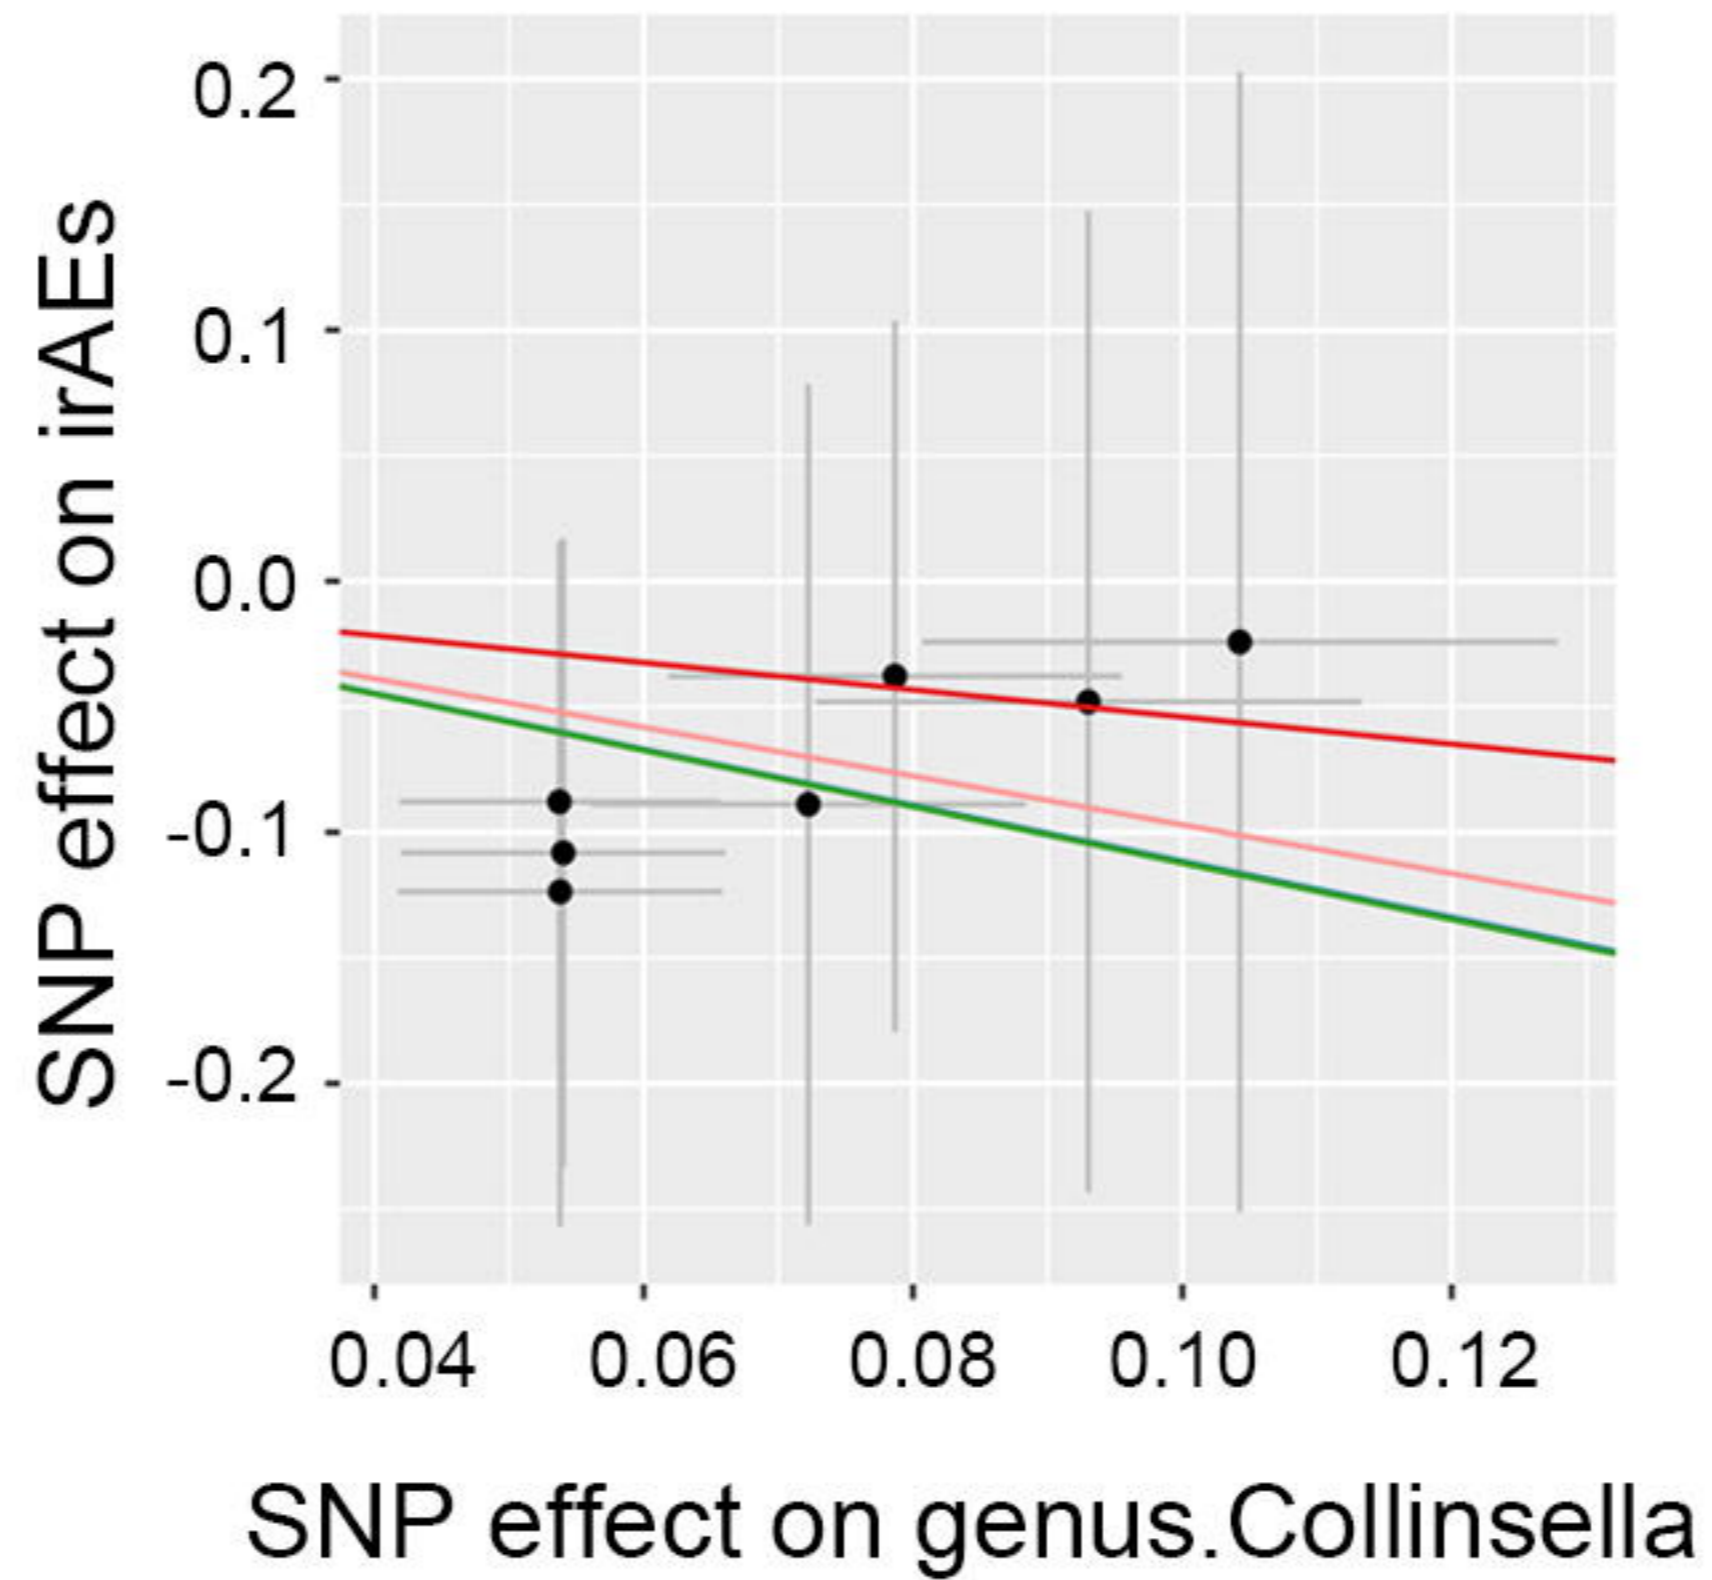

### *Eubacterium* (*fissicatena* group)

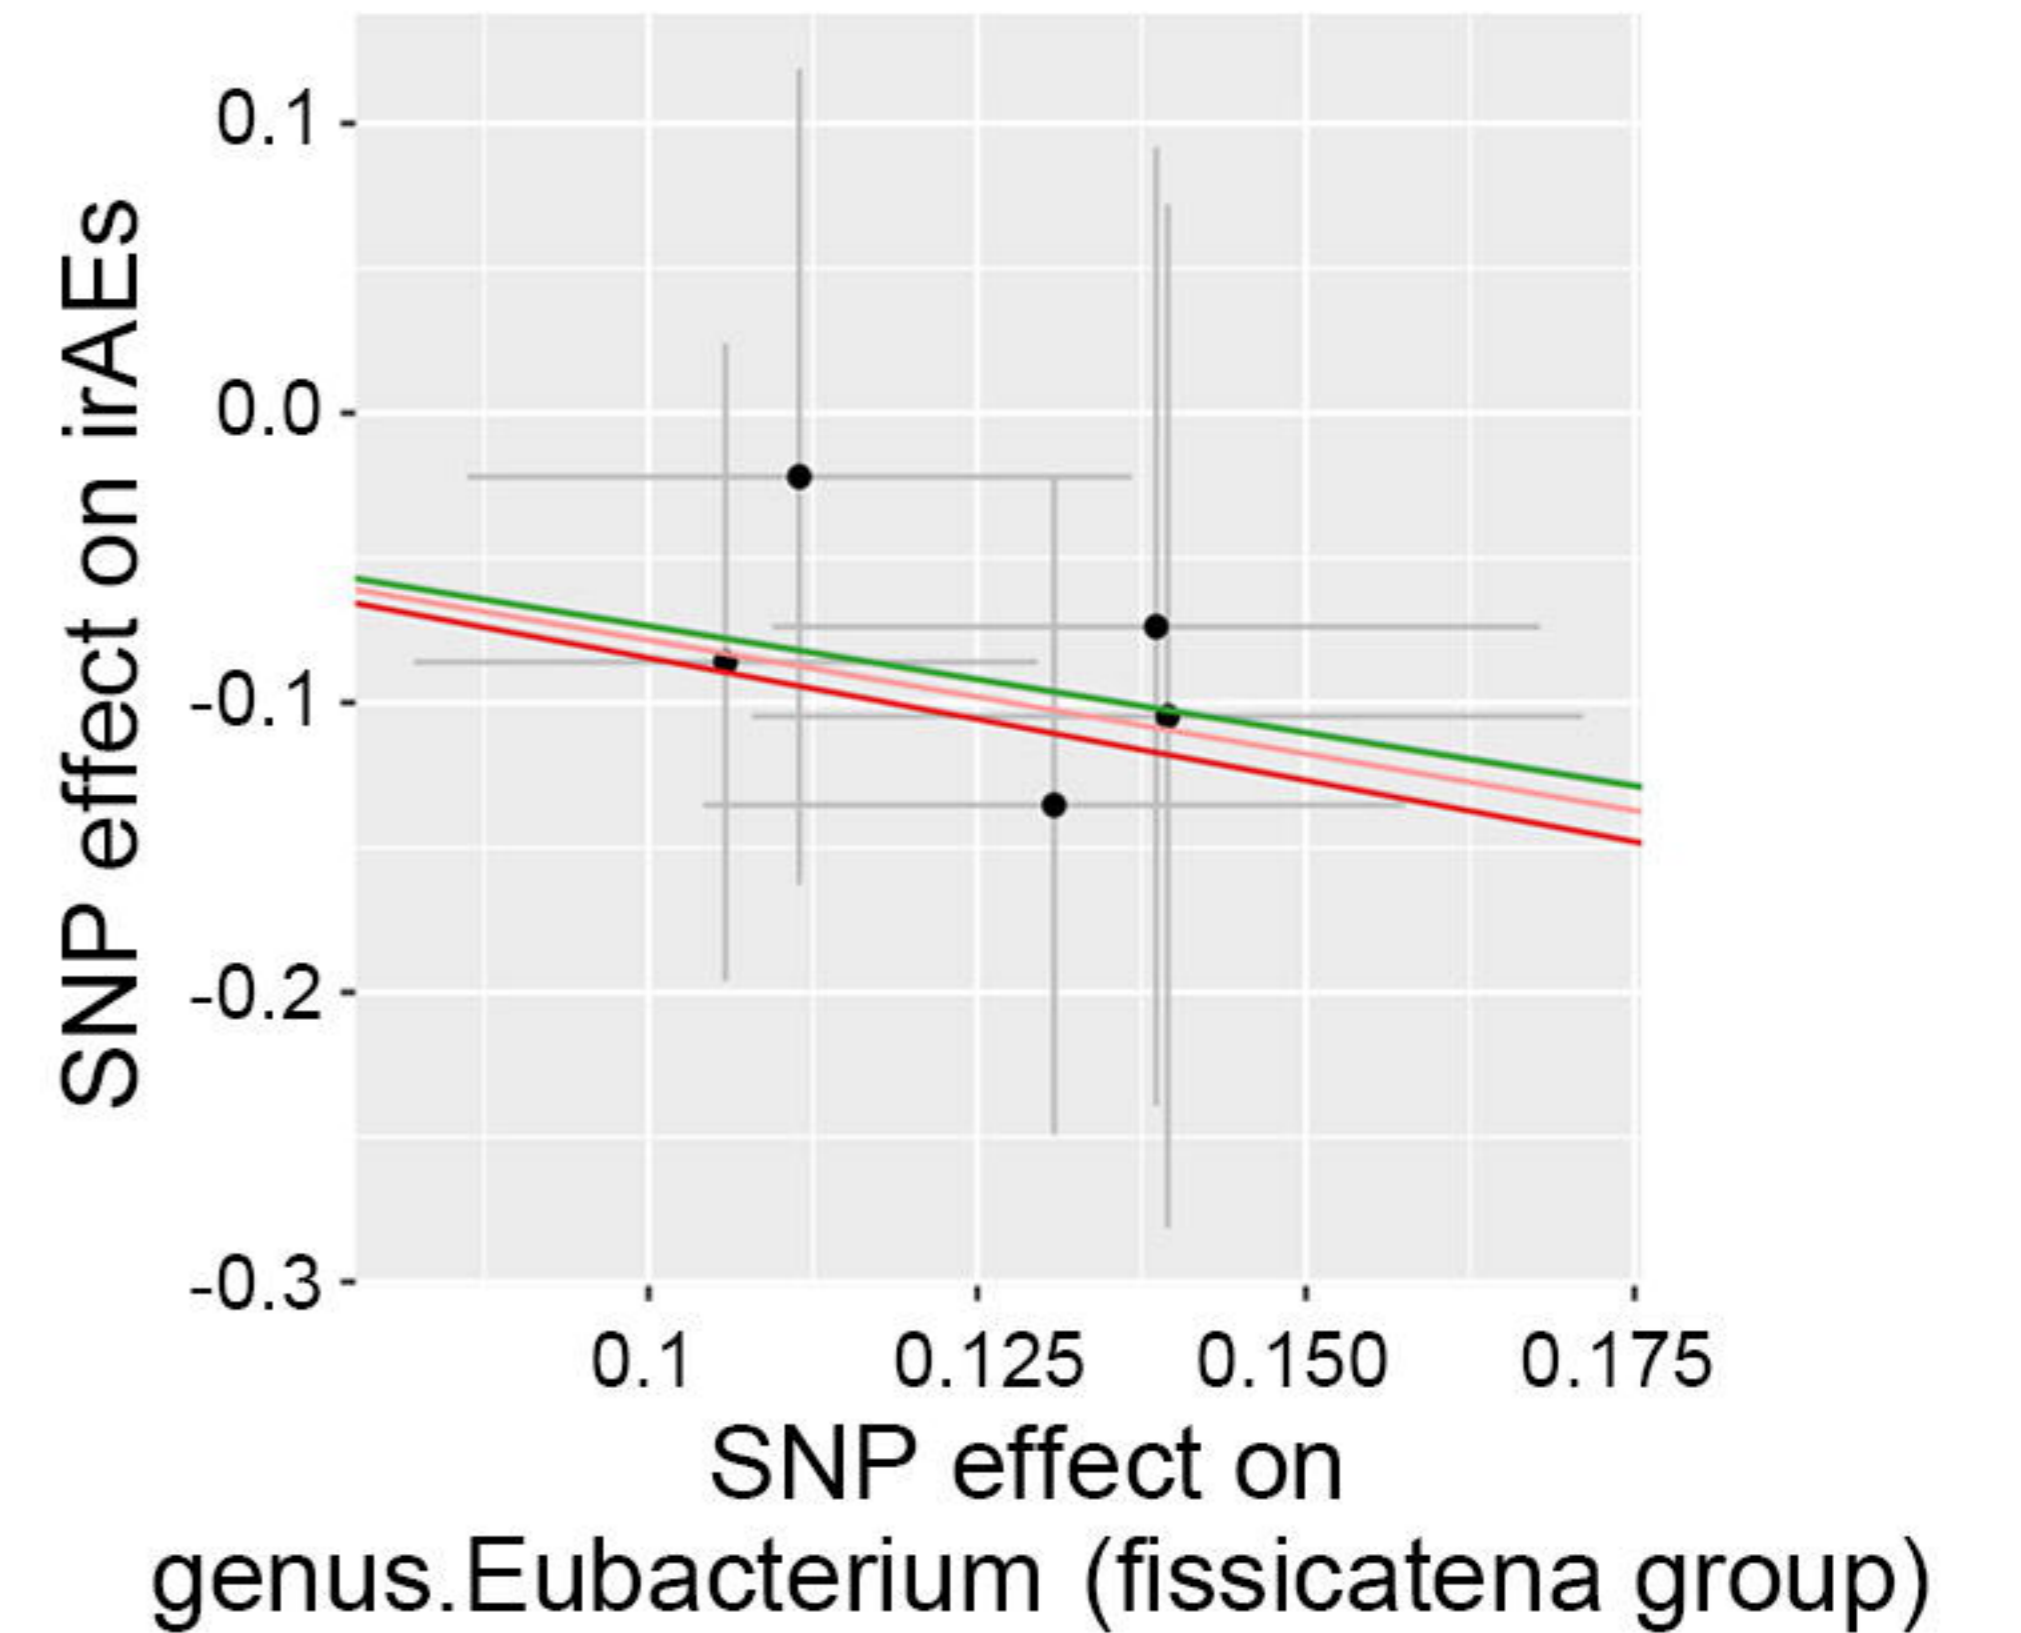



# All-grade irAEs

## Family level

### *Lachnospiraceae*

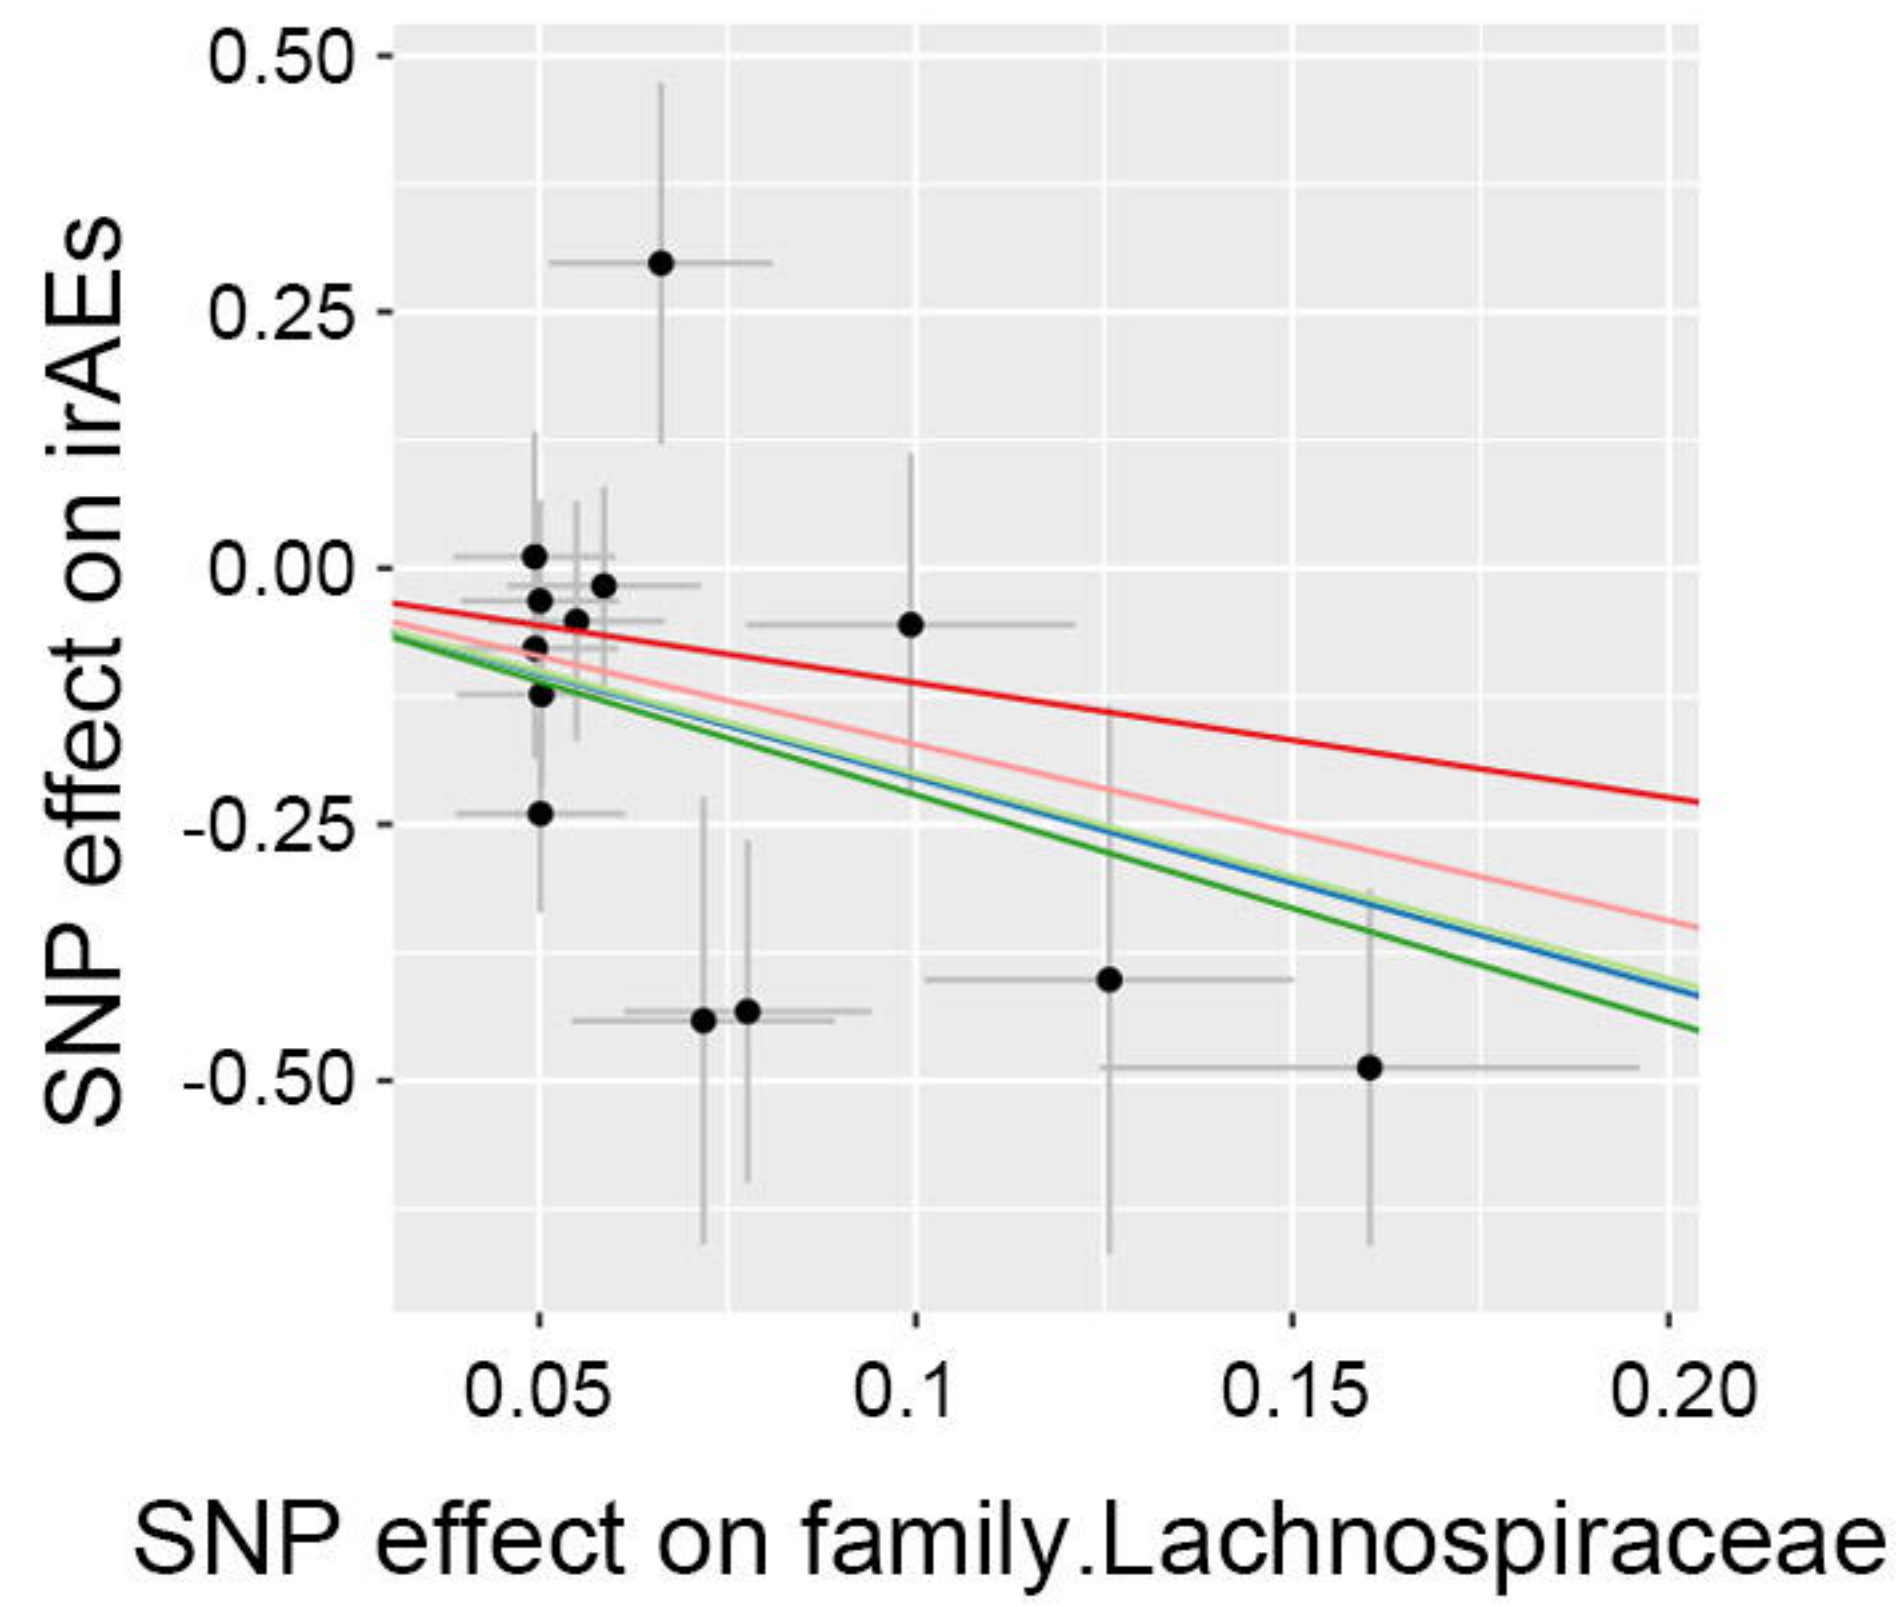

### *Porphyromonadaceae*

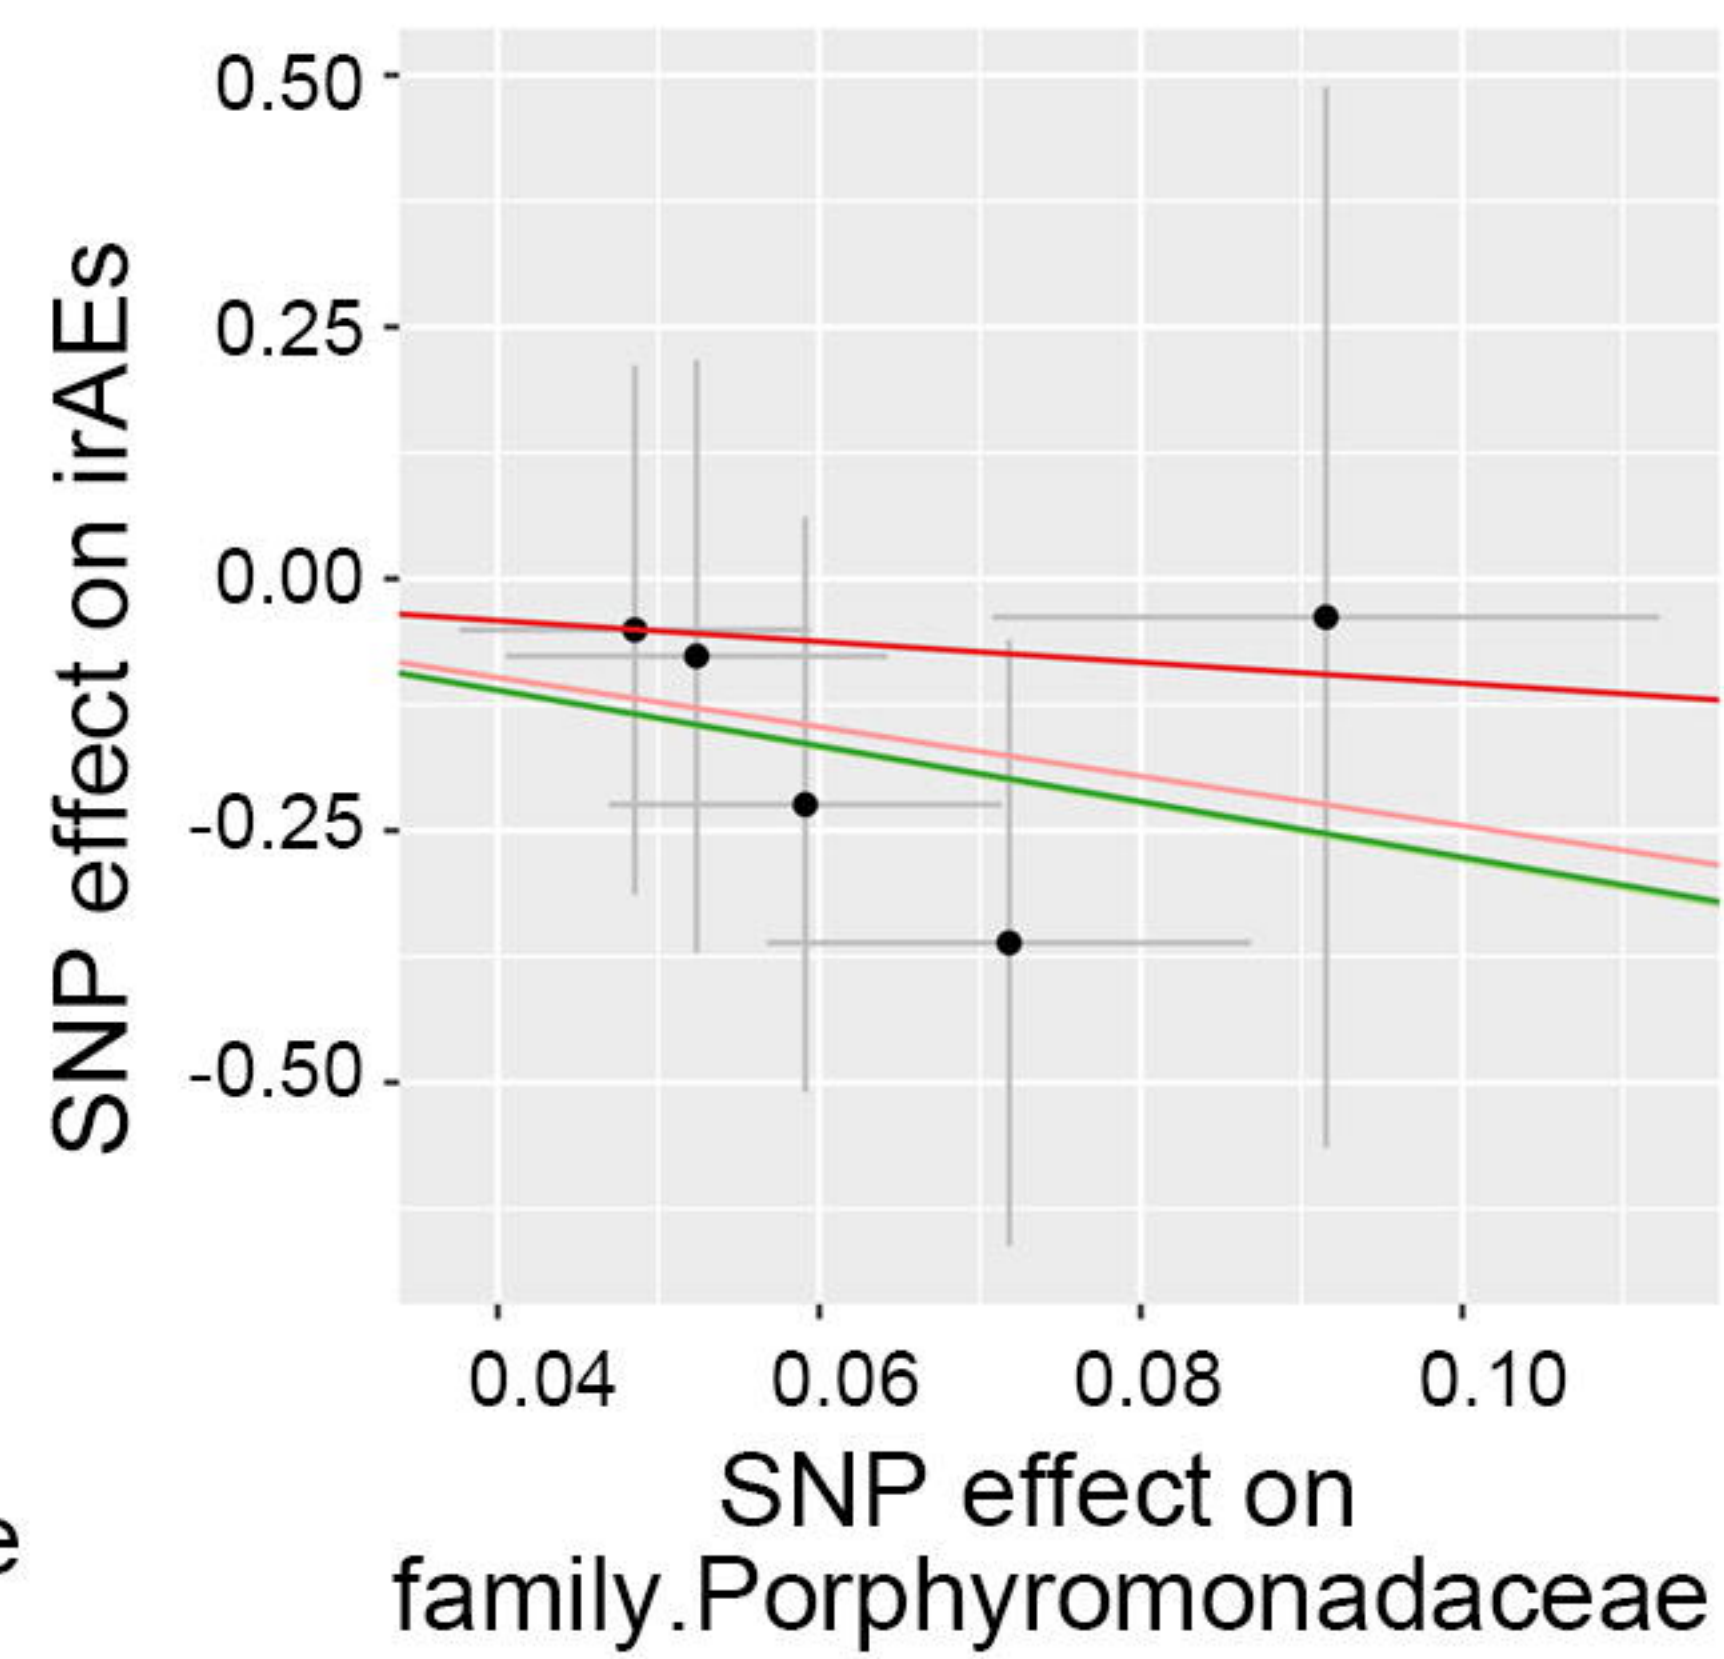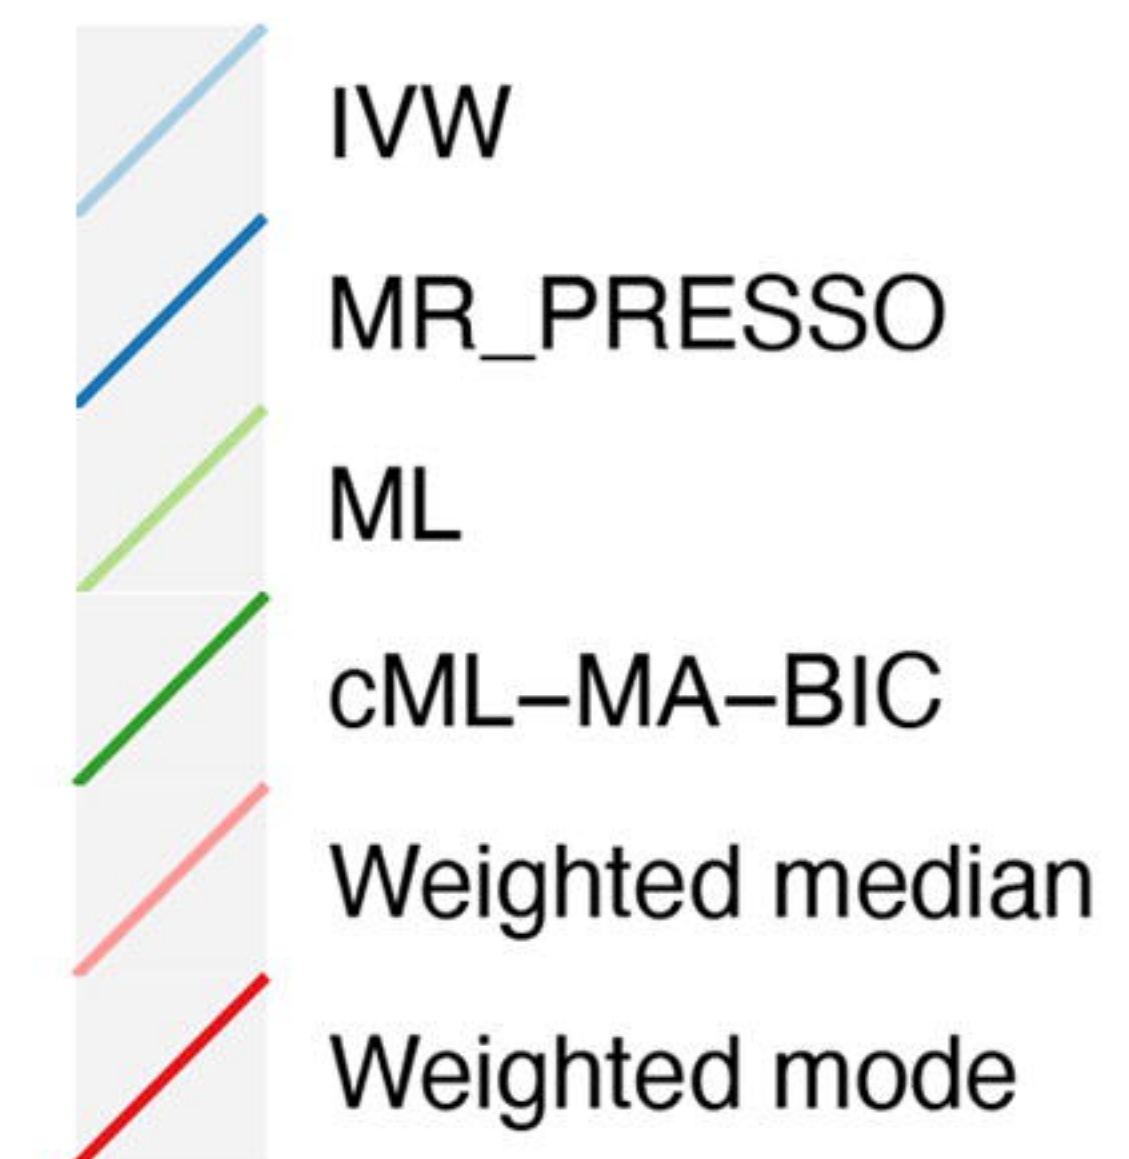

## Genus level

### *Roseburia*

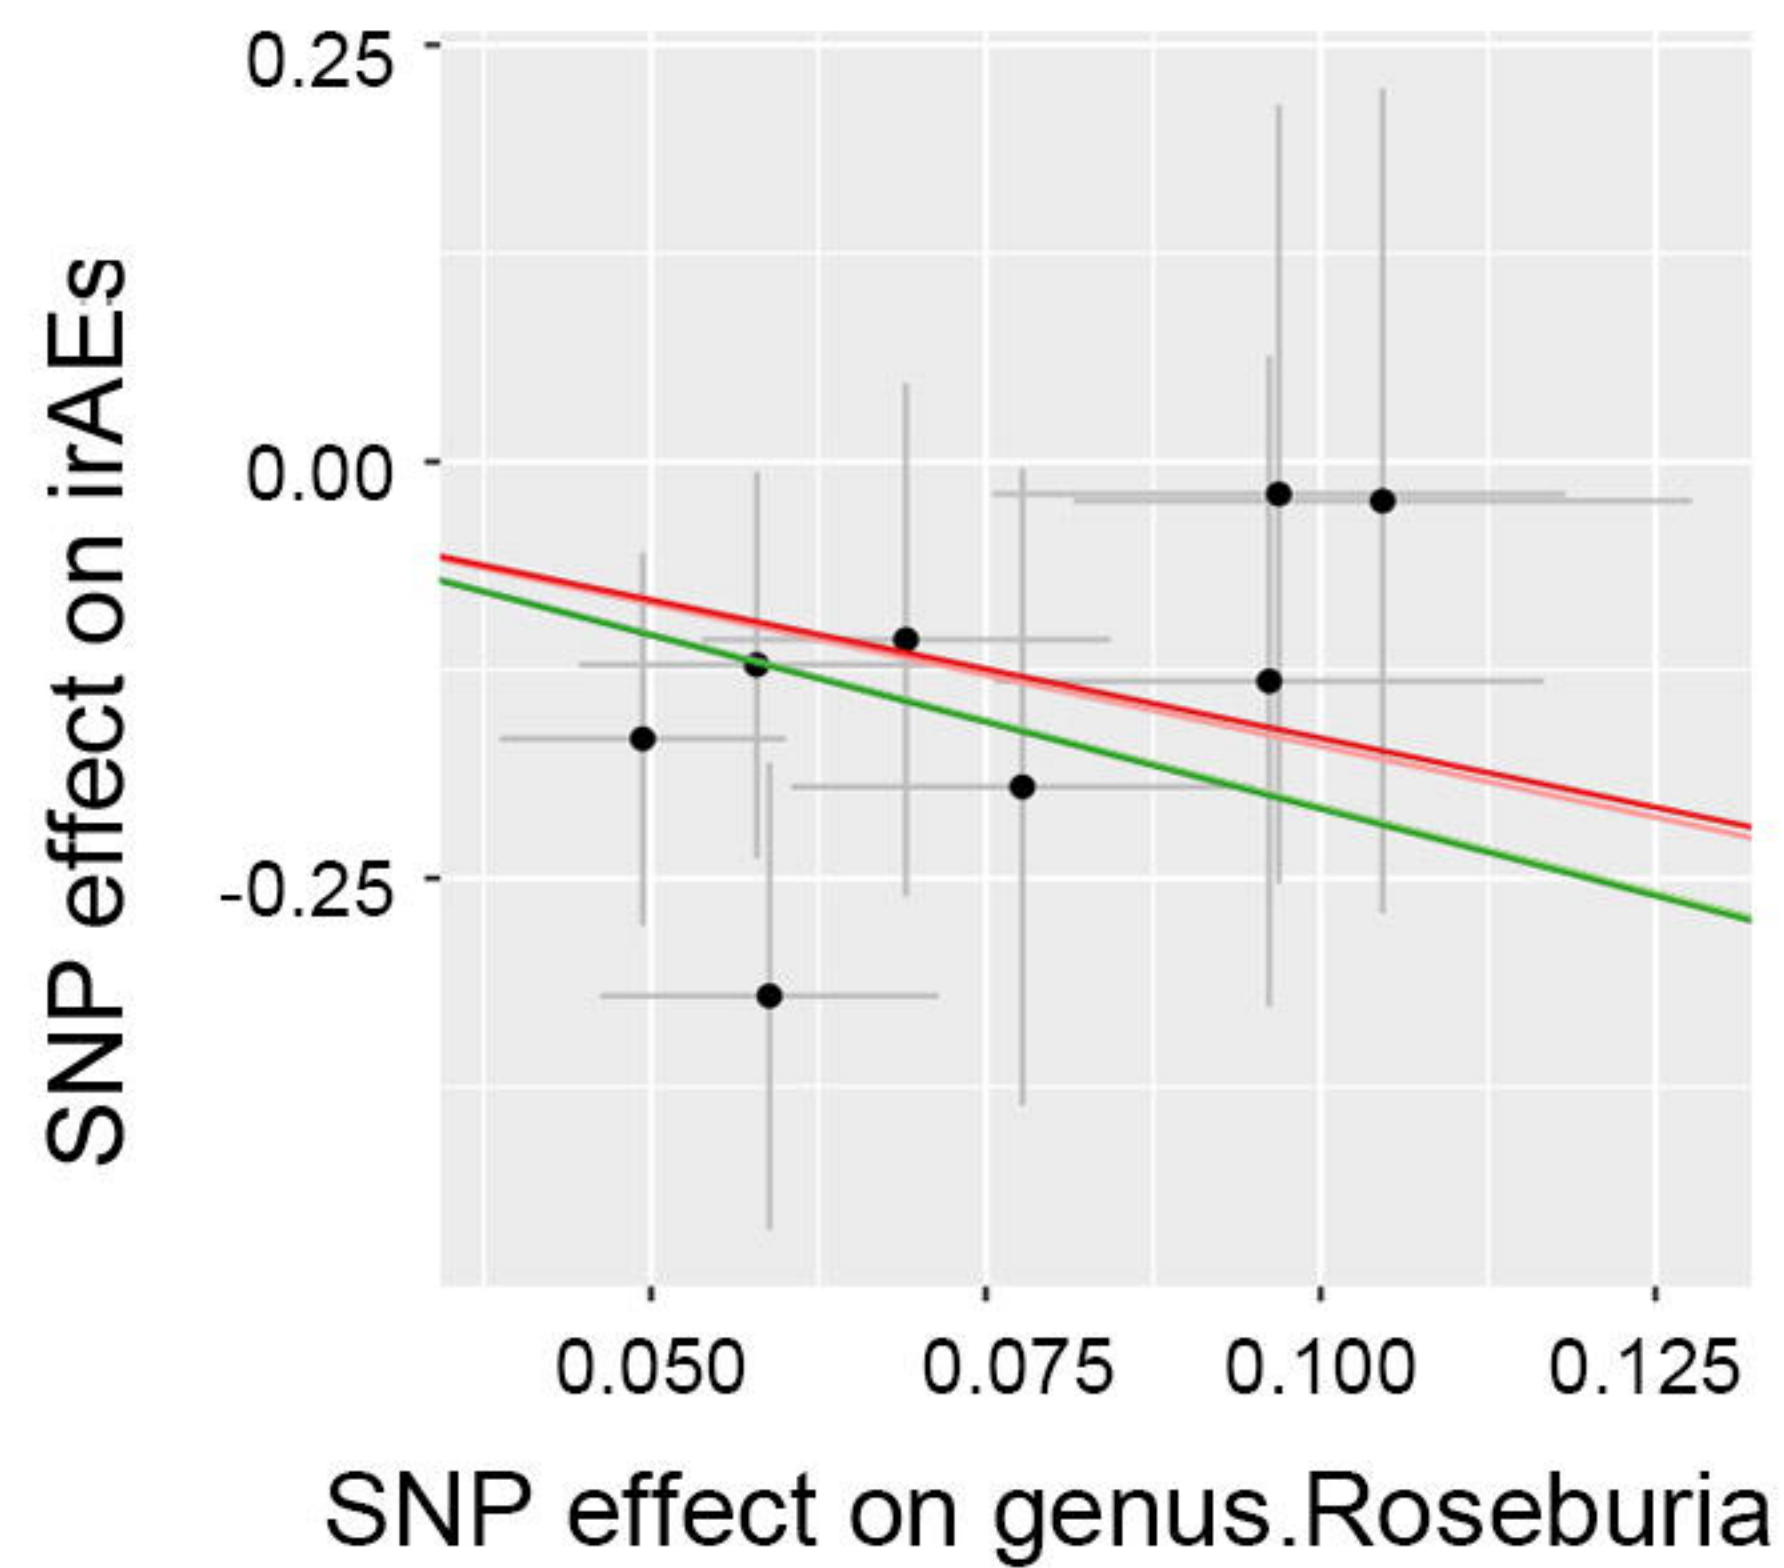

### *Ruminococcaceae*UCG004

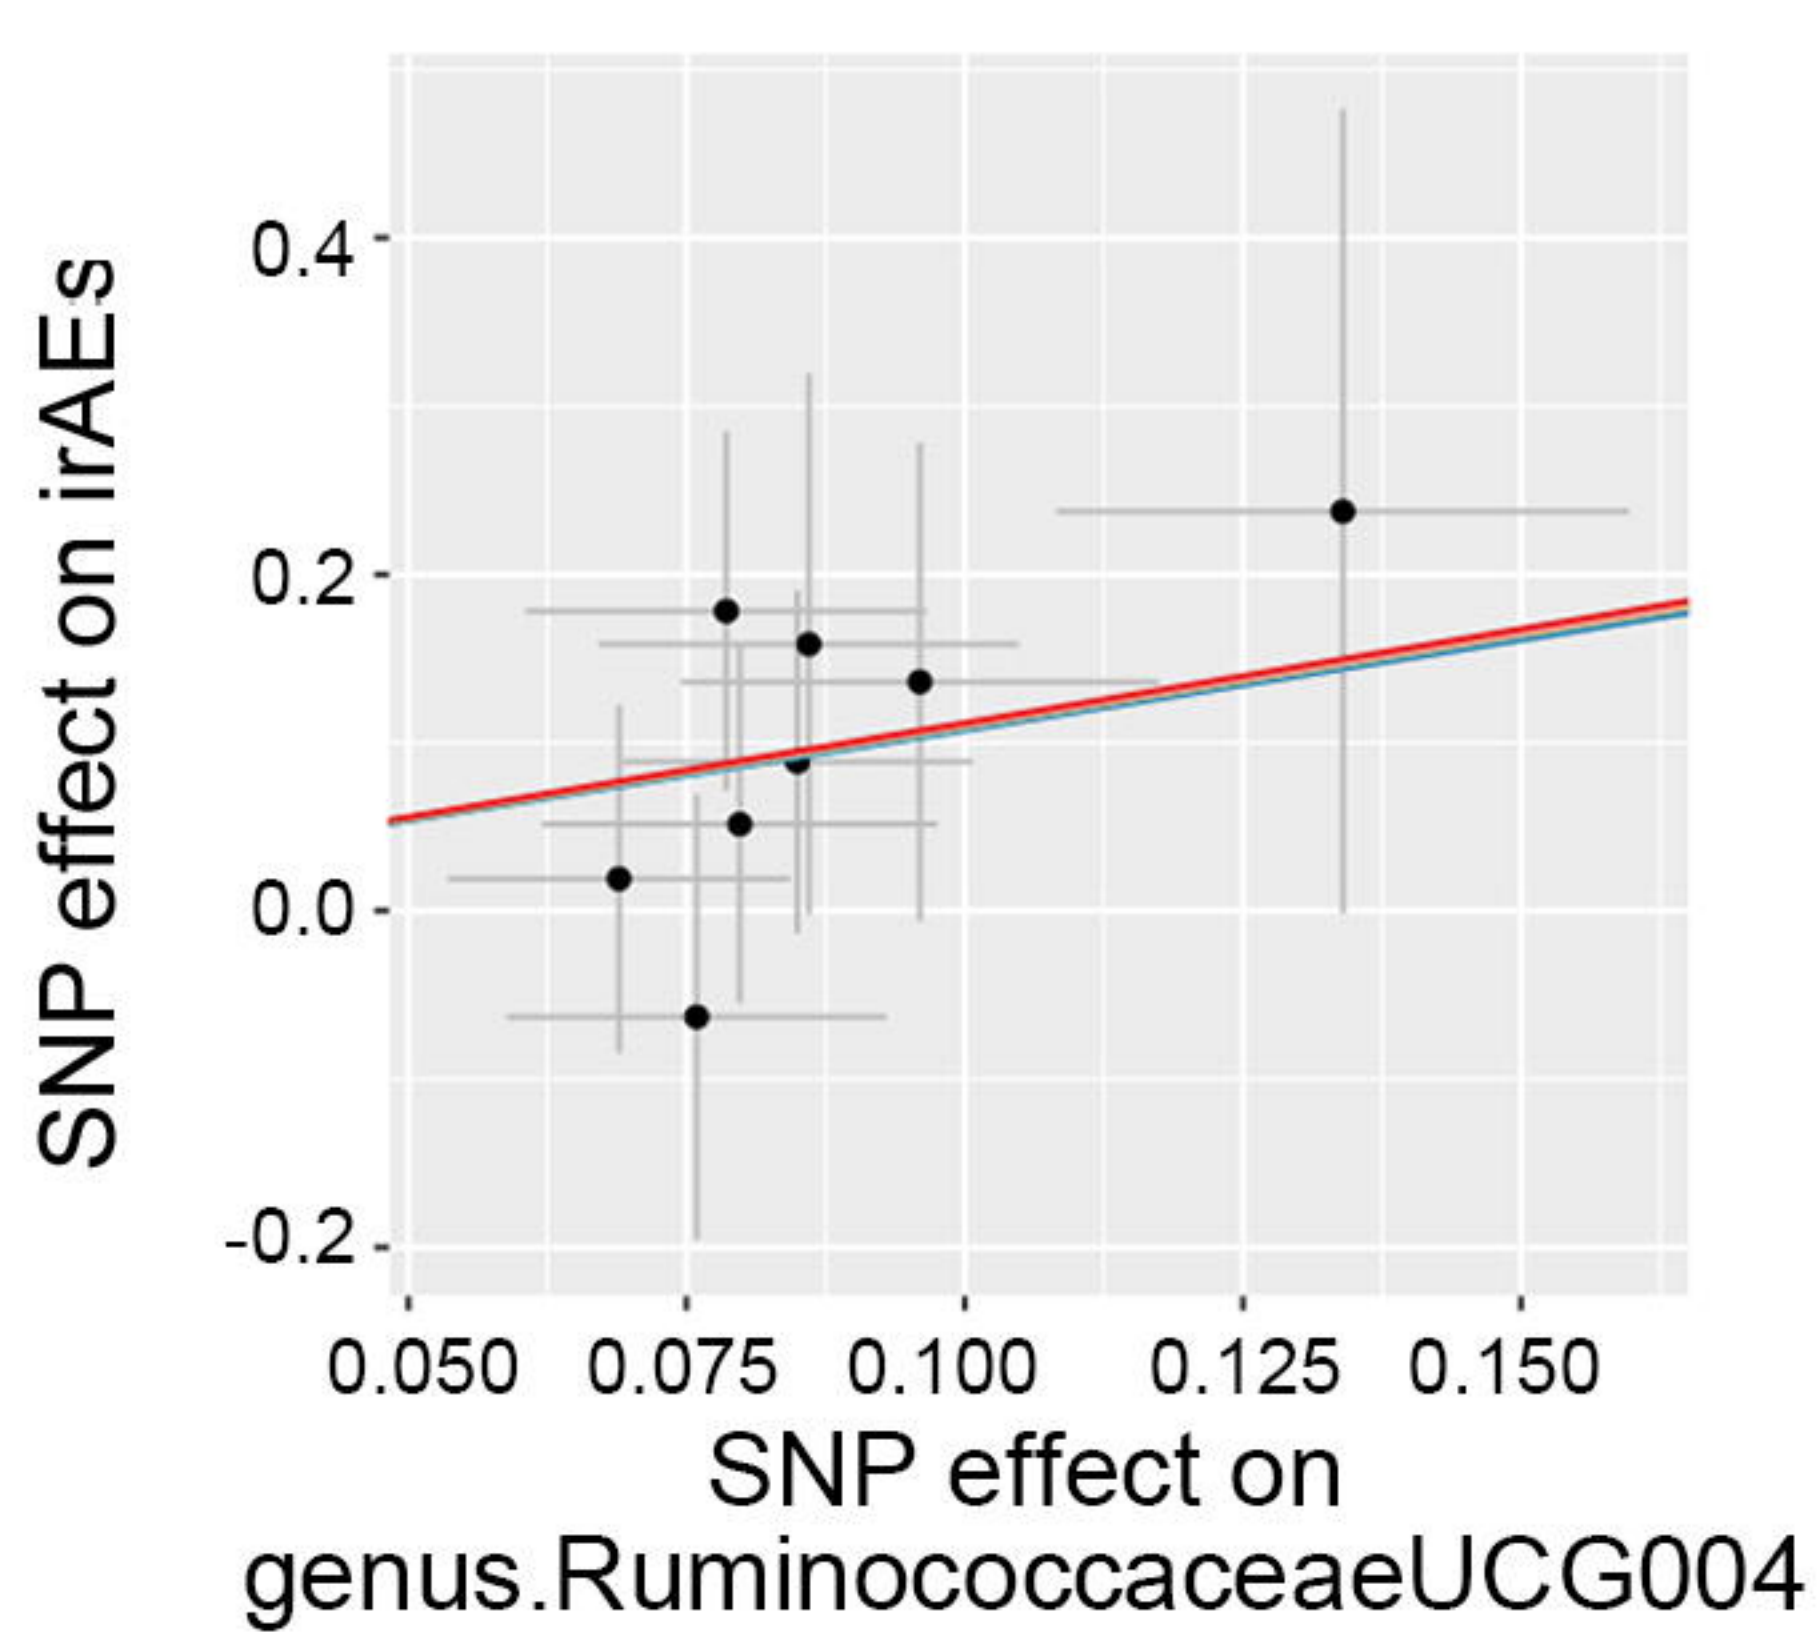

### *Defluviitaleaceae*UCG011

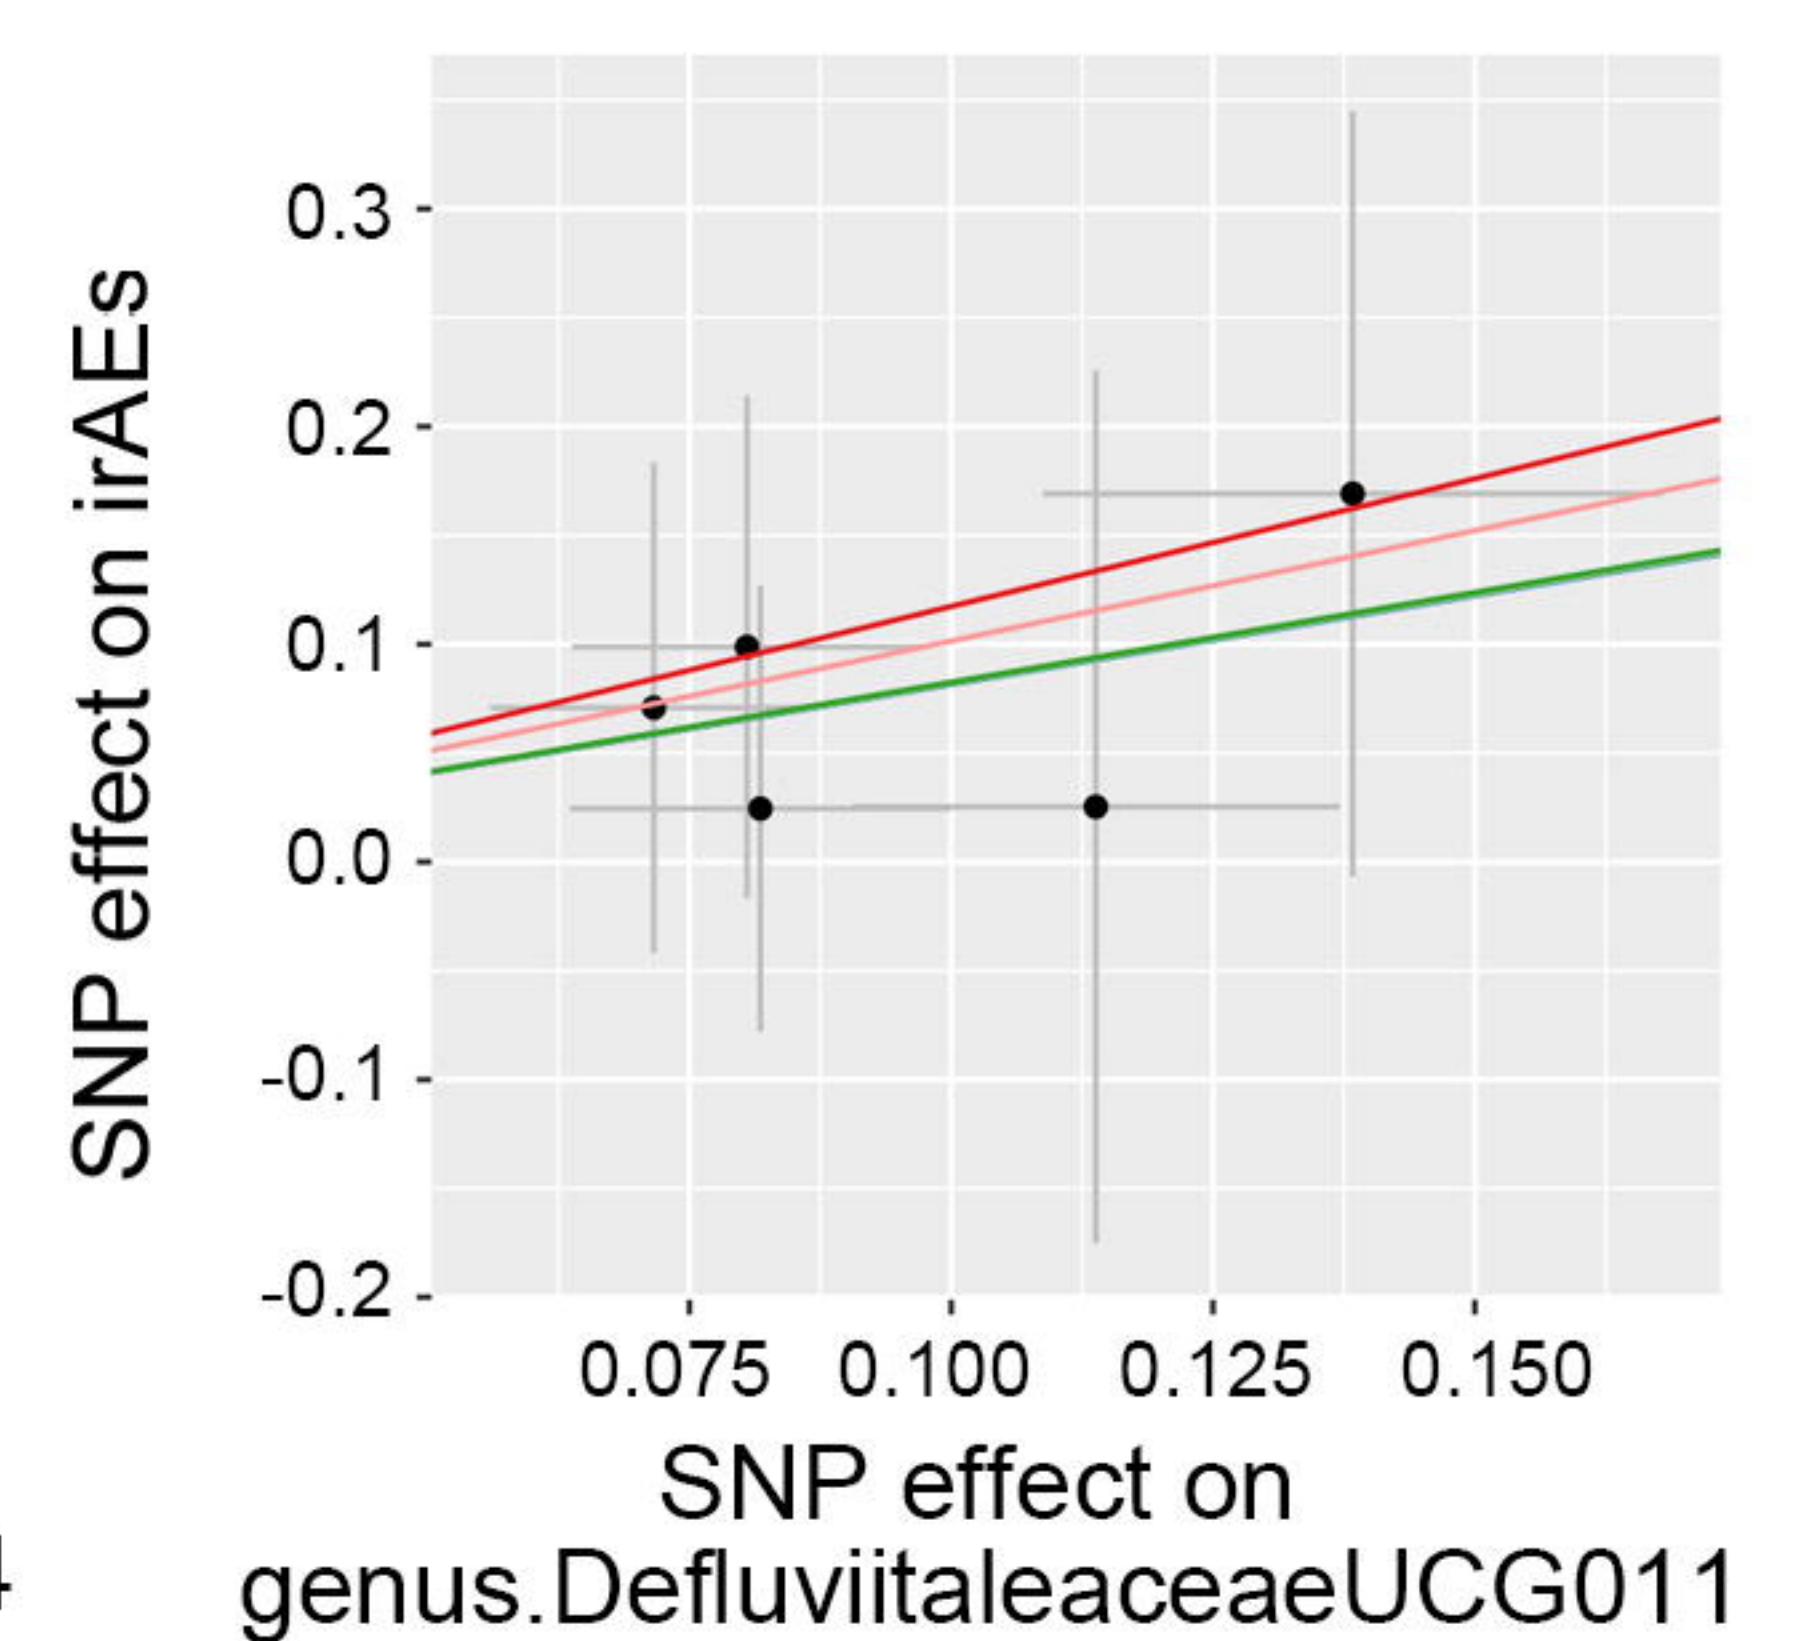

### *Eubacterium* (brachy group)

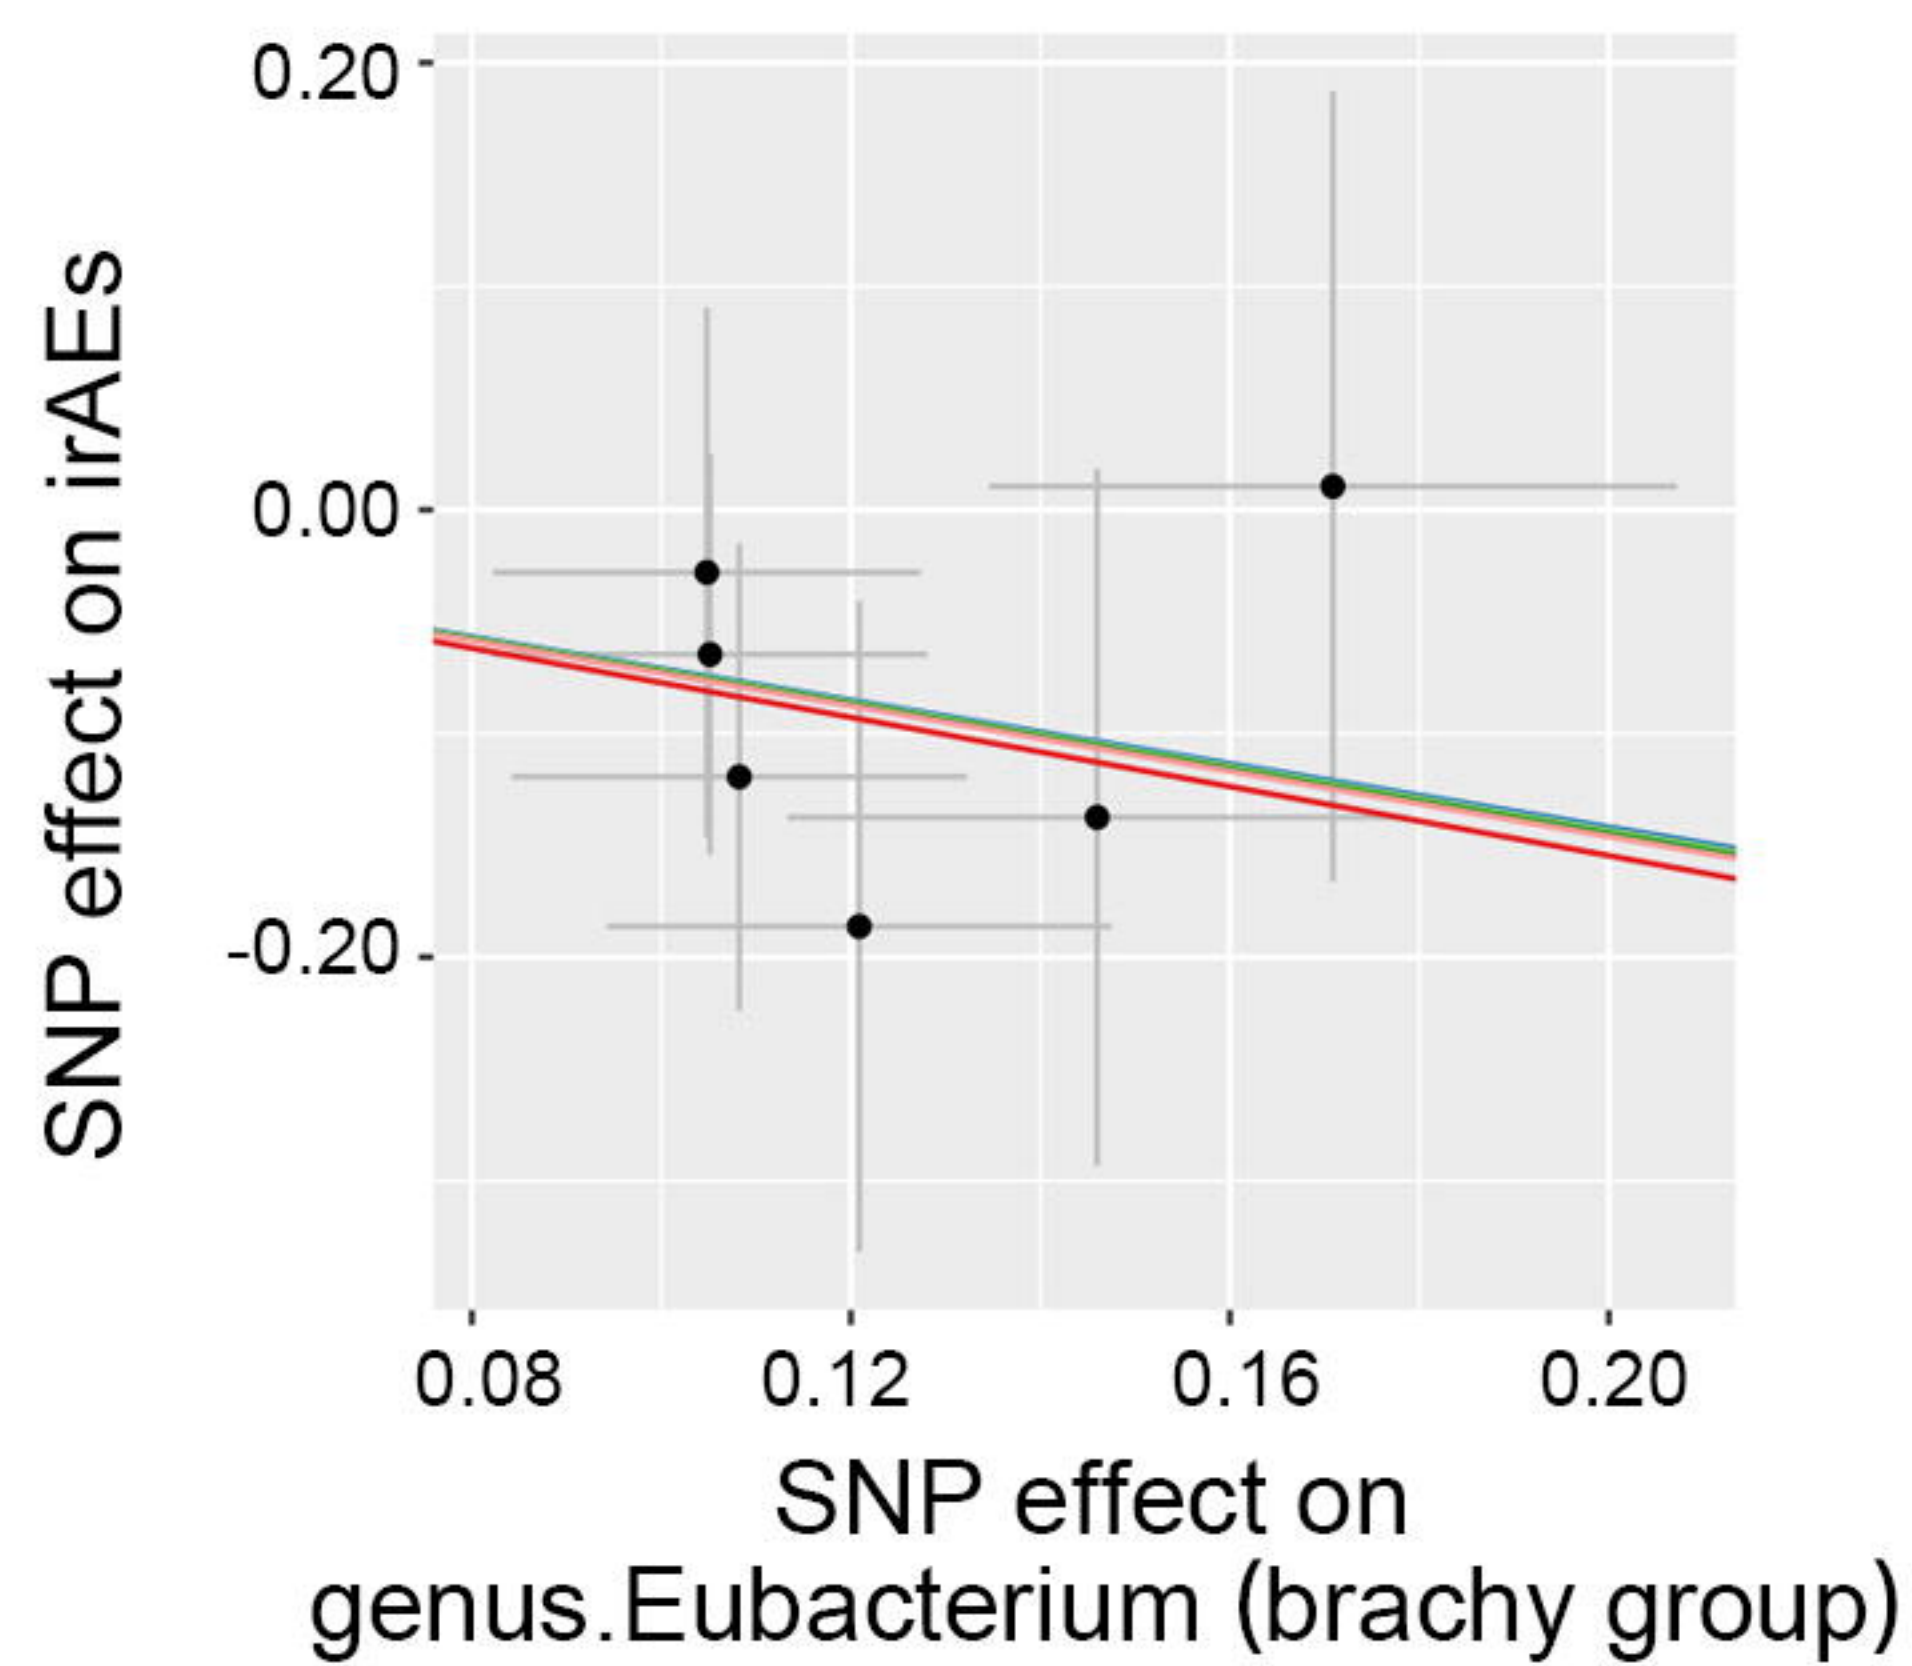

### *Peptococcus*

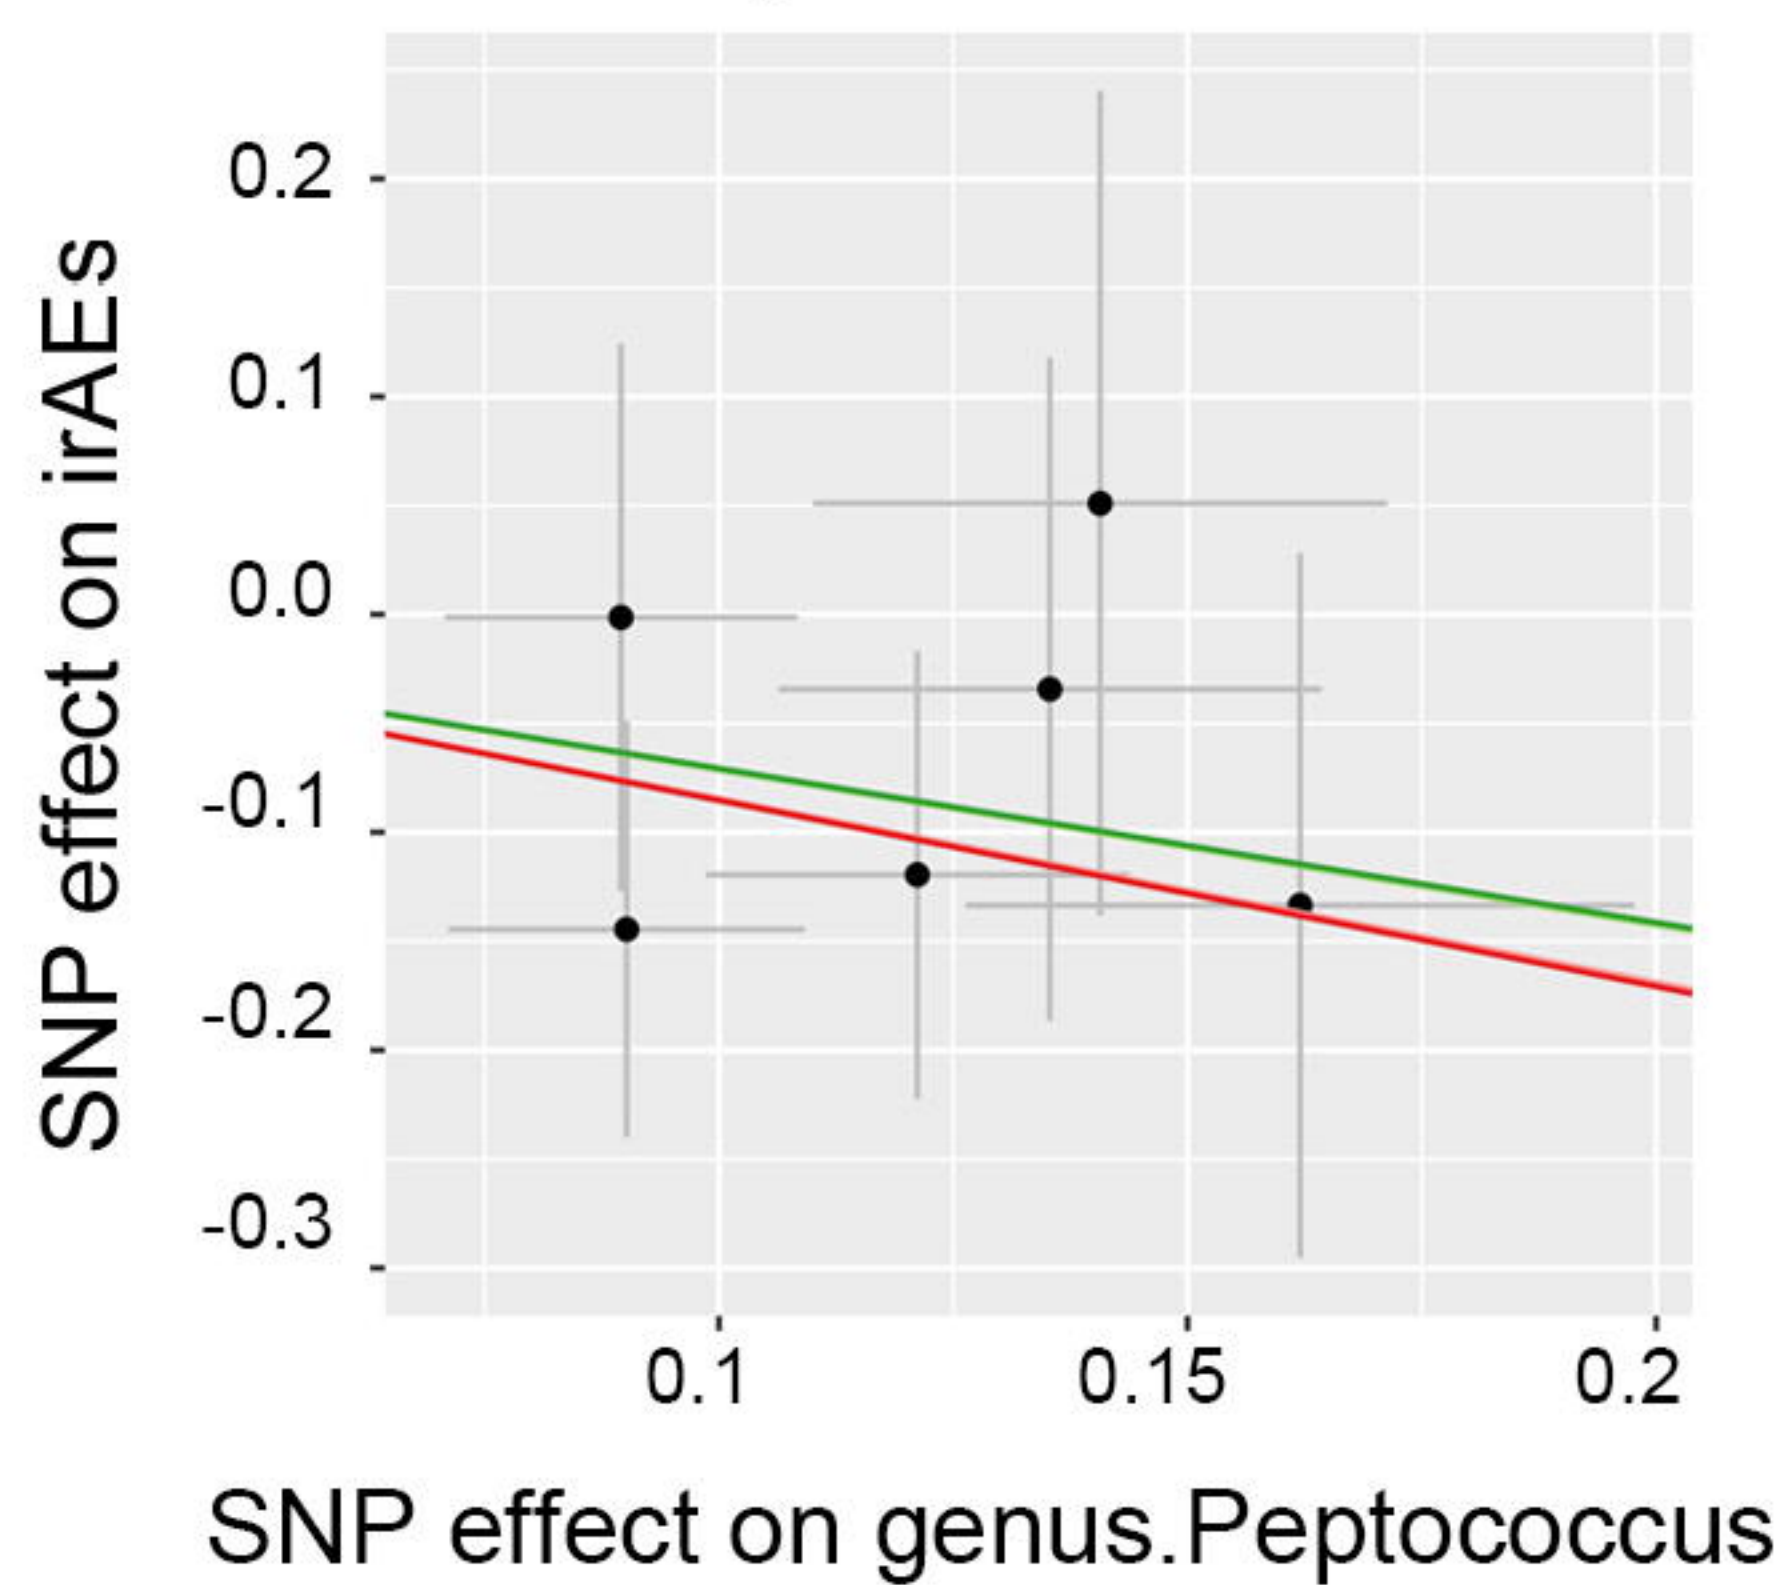



# High-grade irAEs

## Family level

### *Lachnospiraceae*

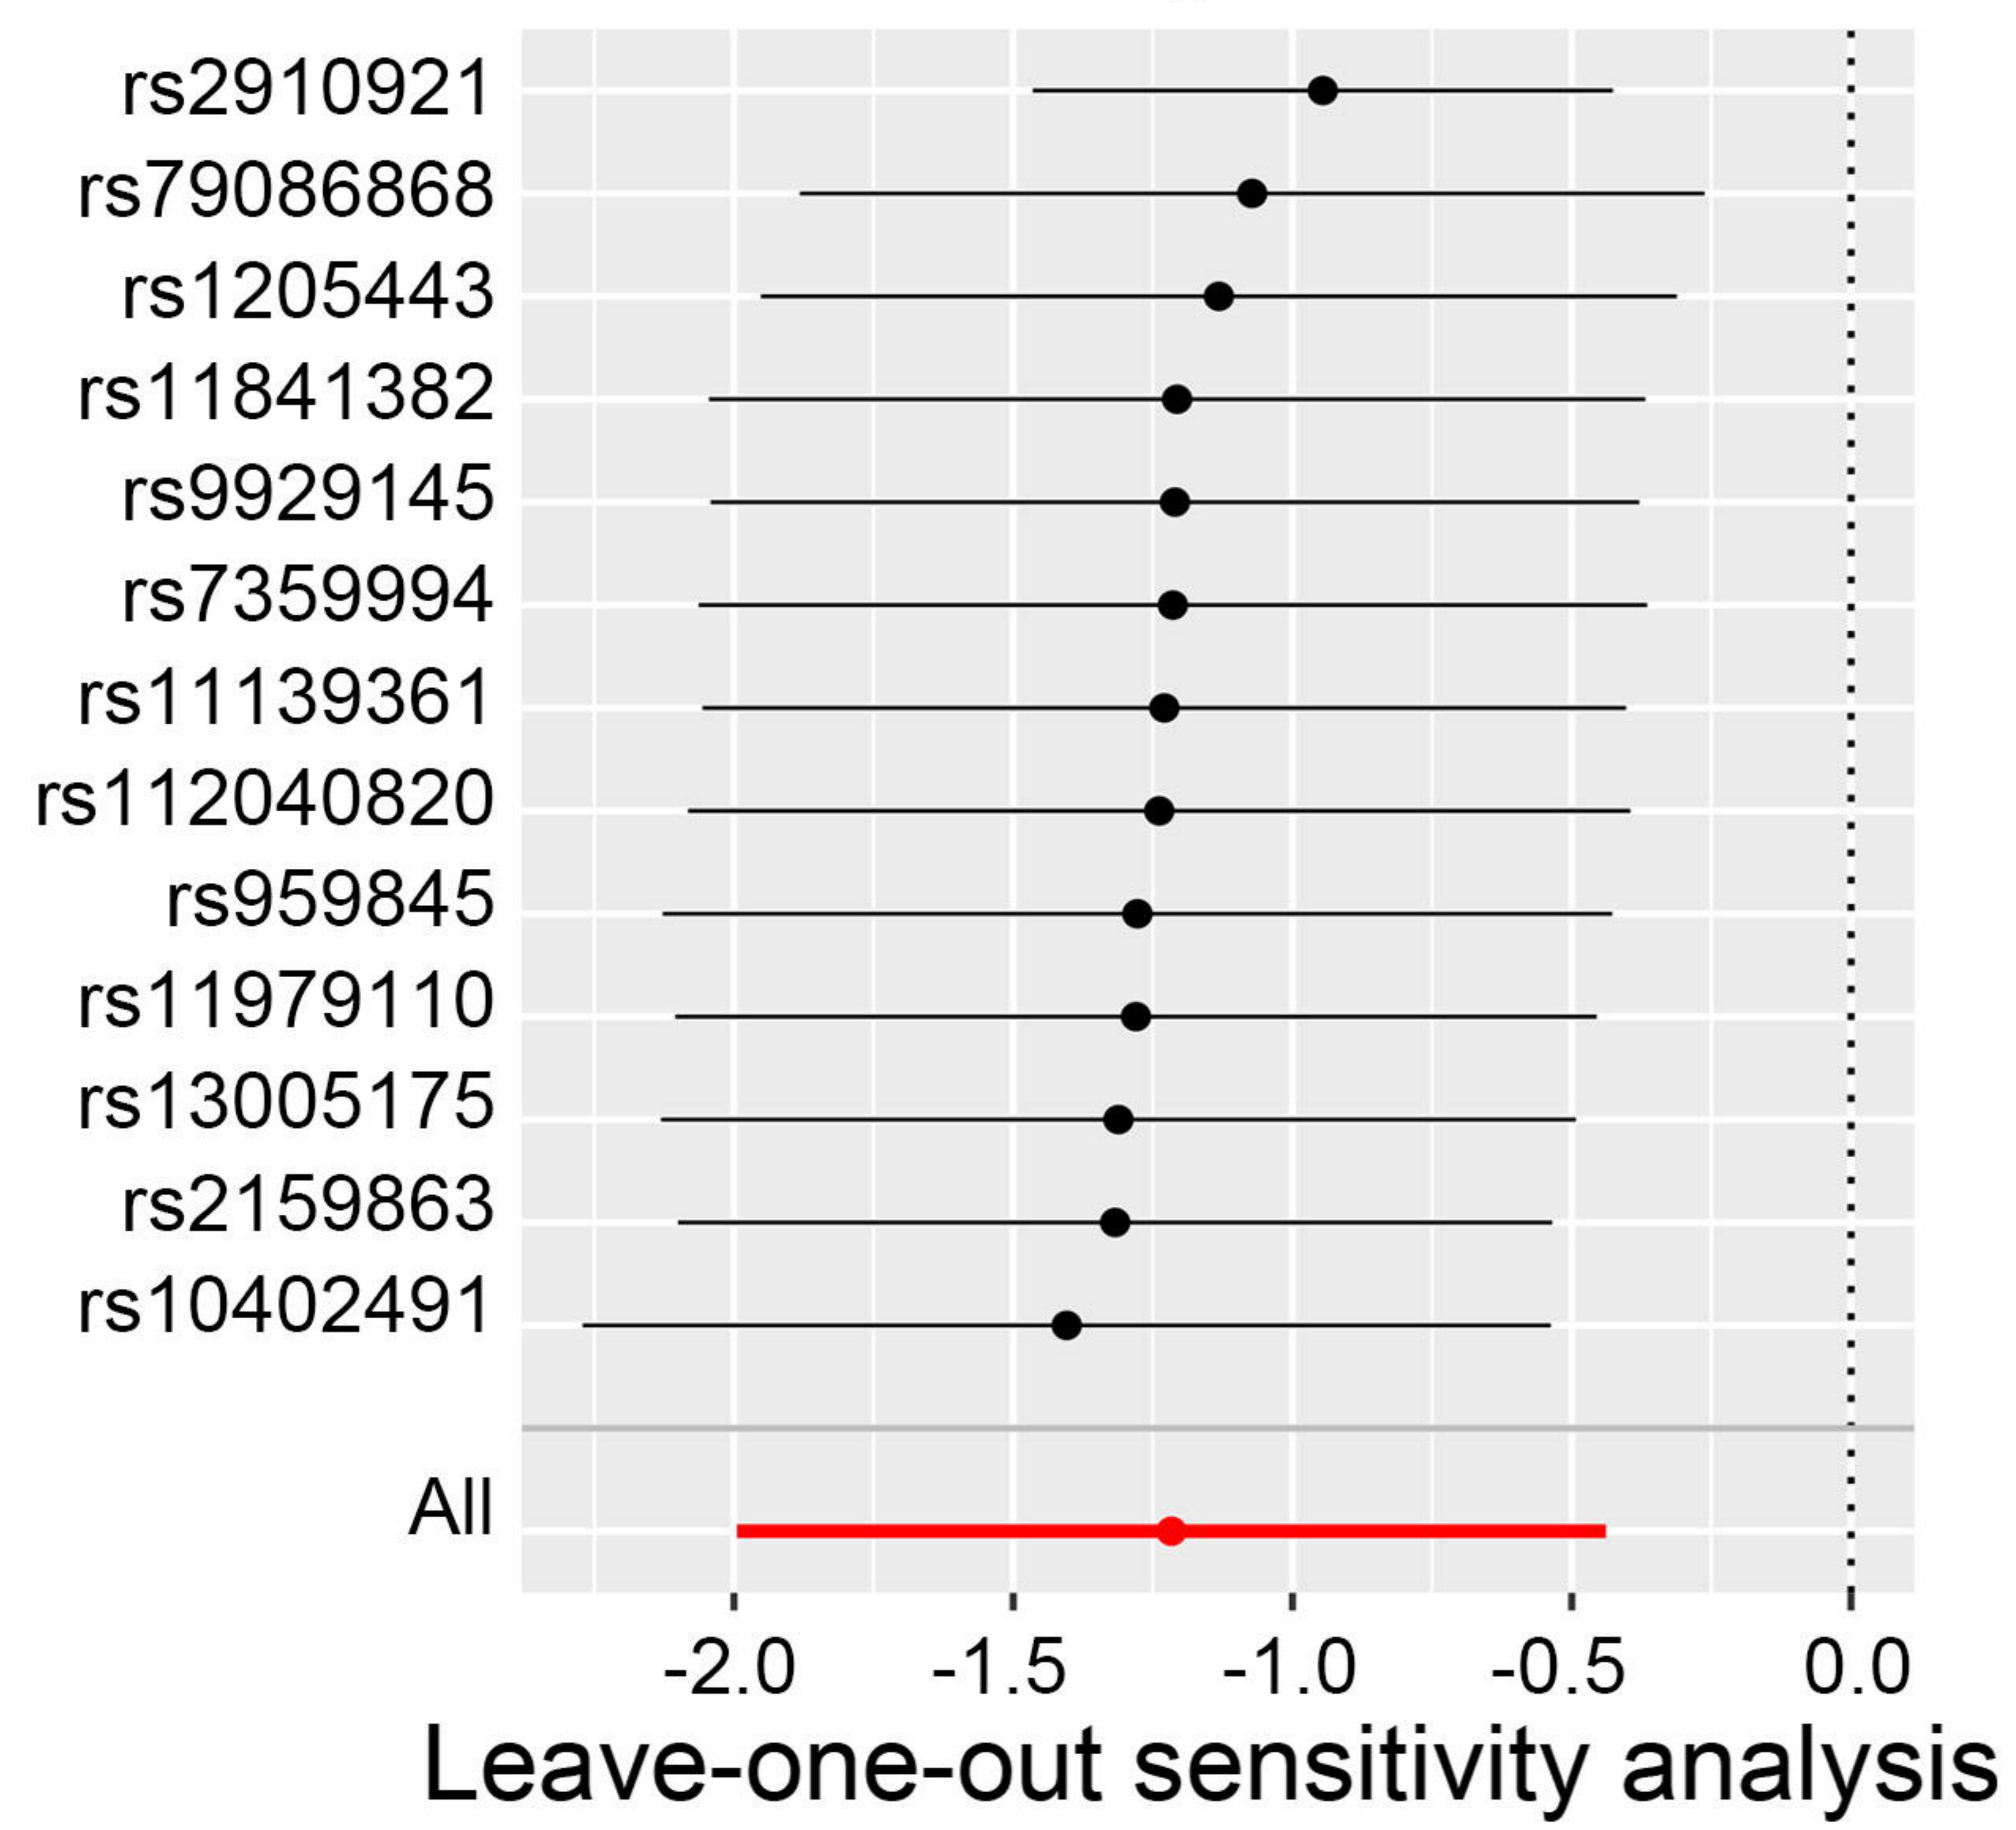

### *Verrucomicrobiaceae*

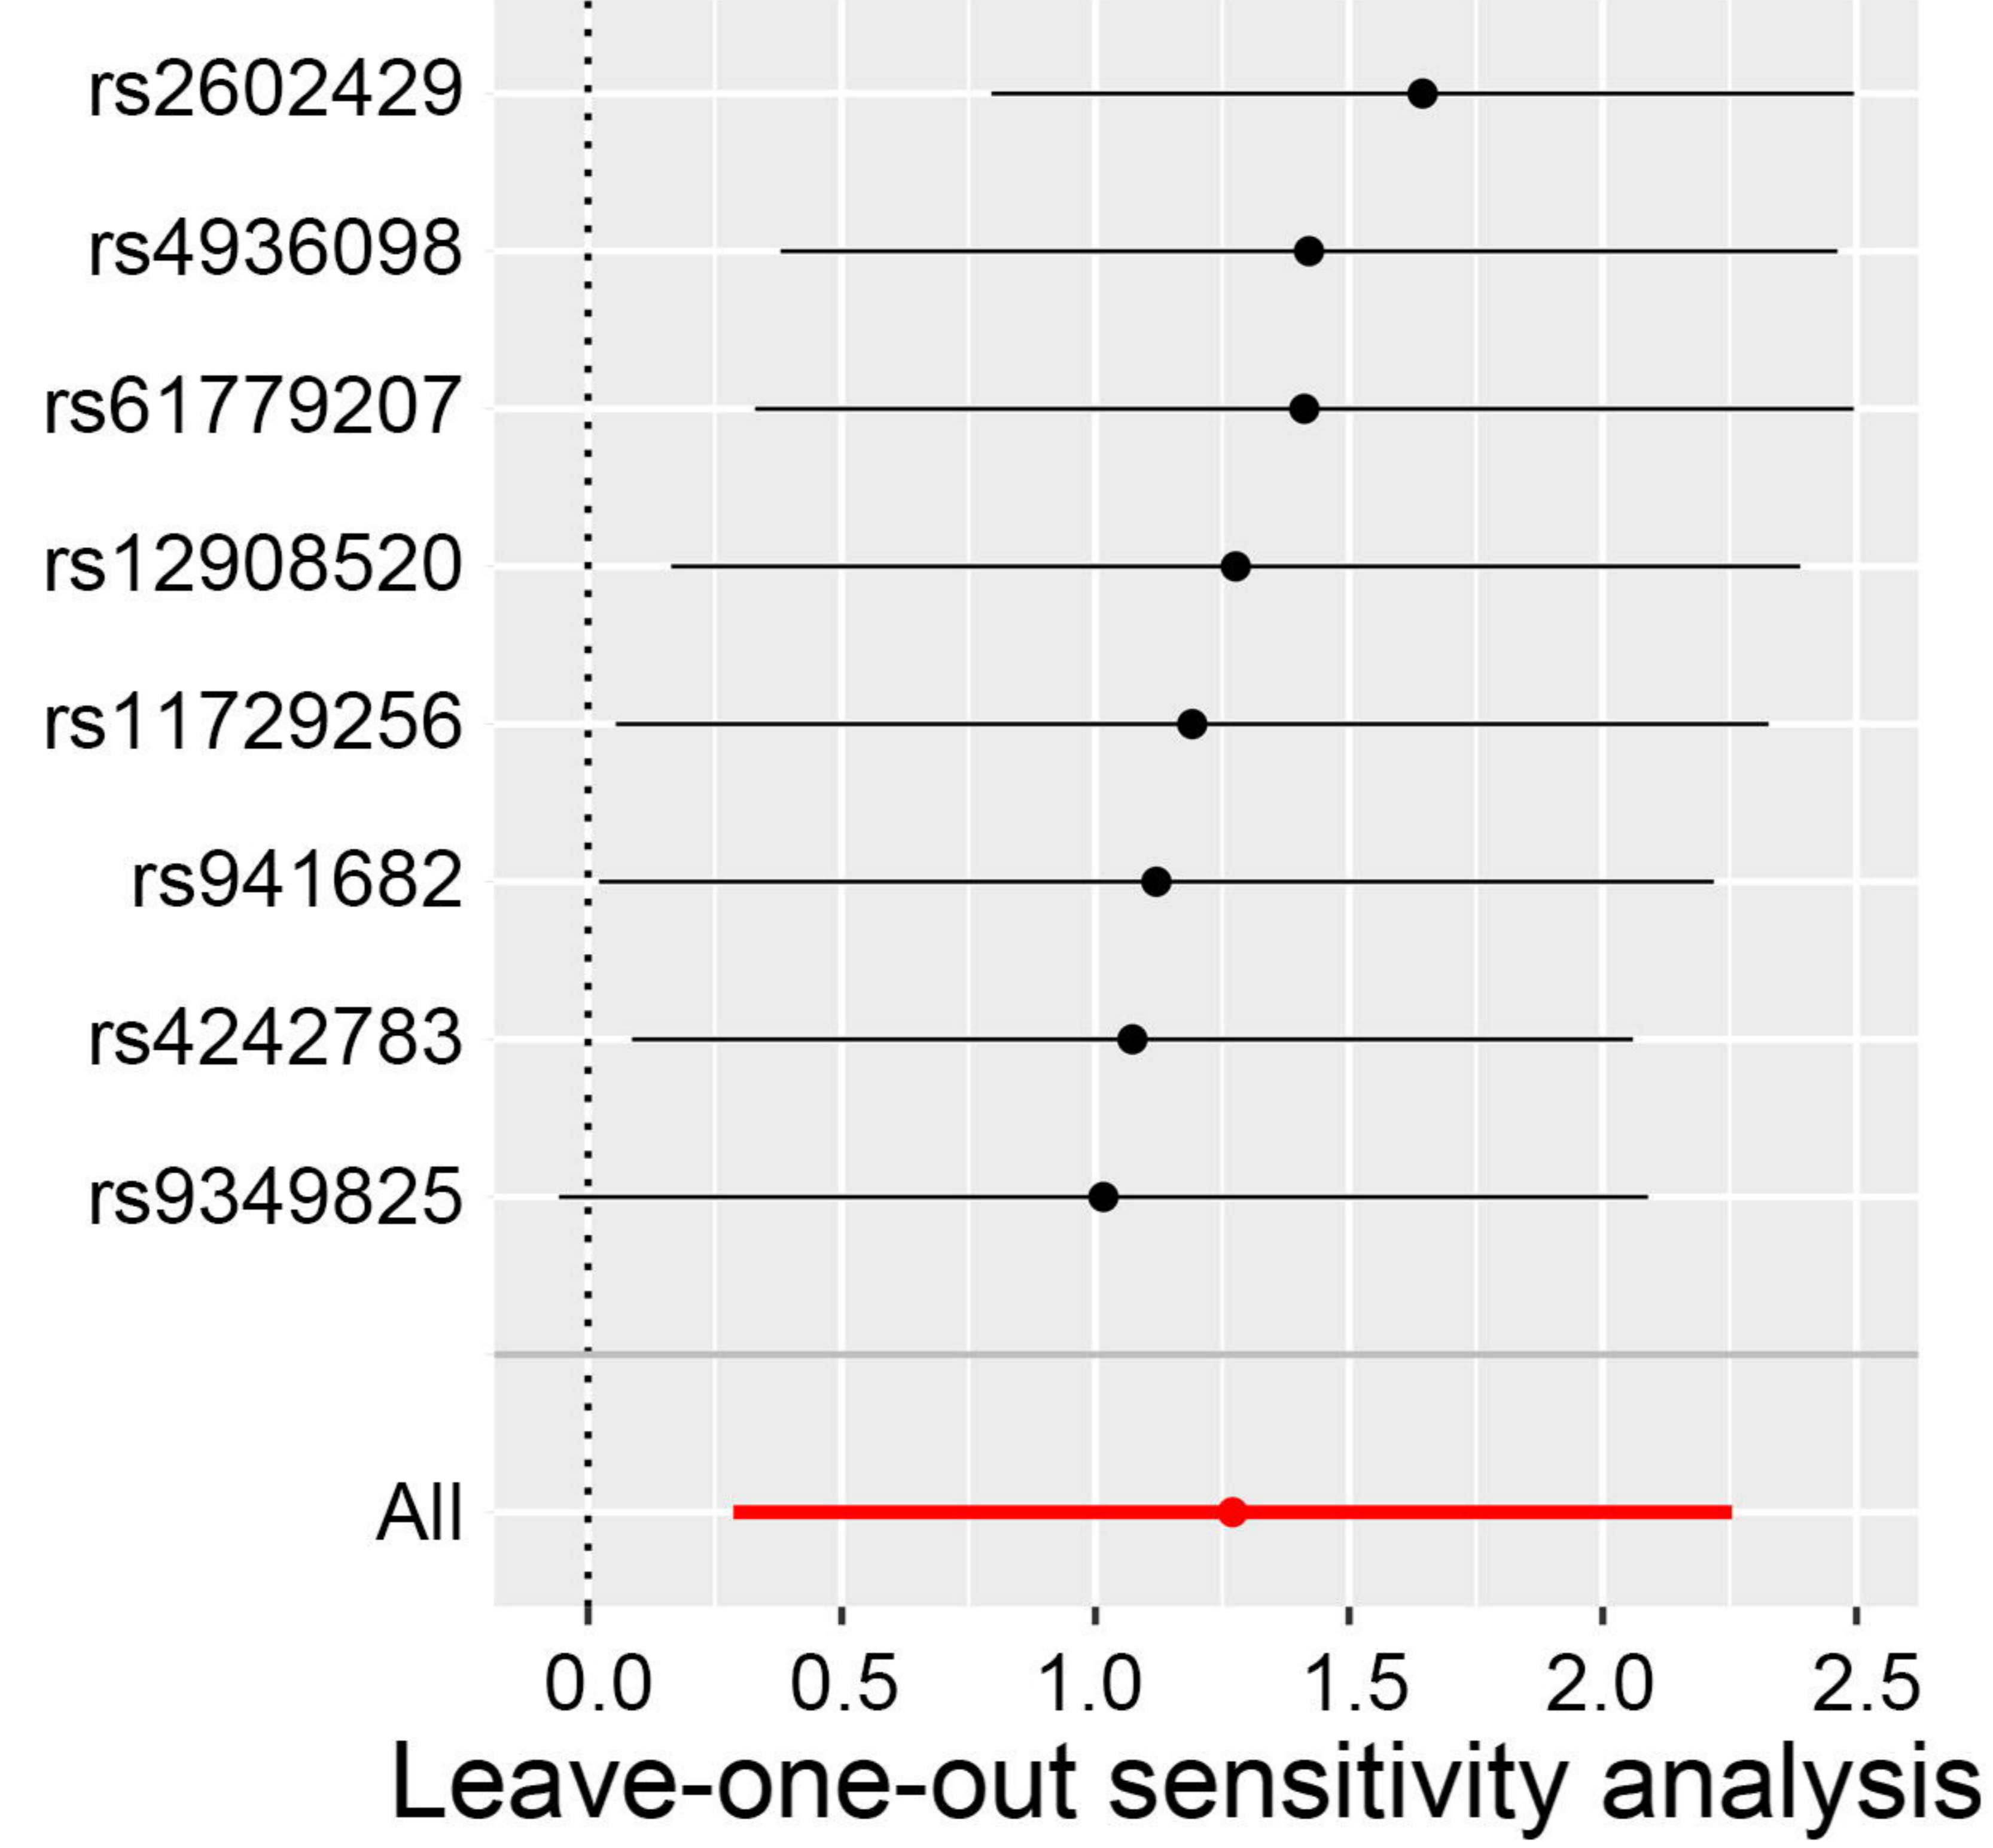

## Genus level

### *Ruminiclostridium6*

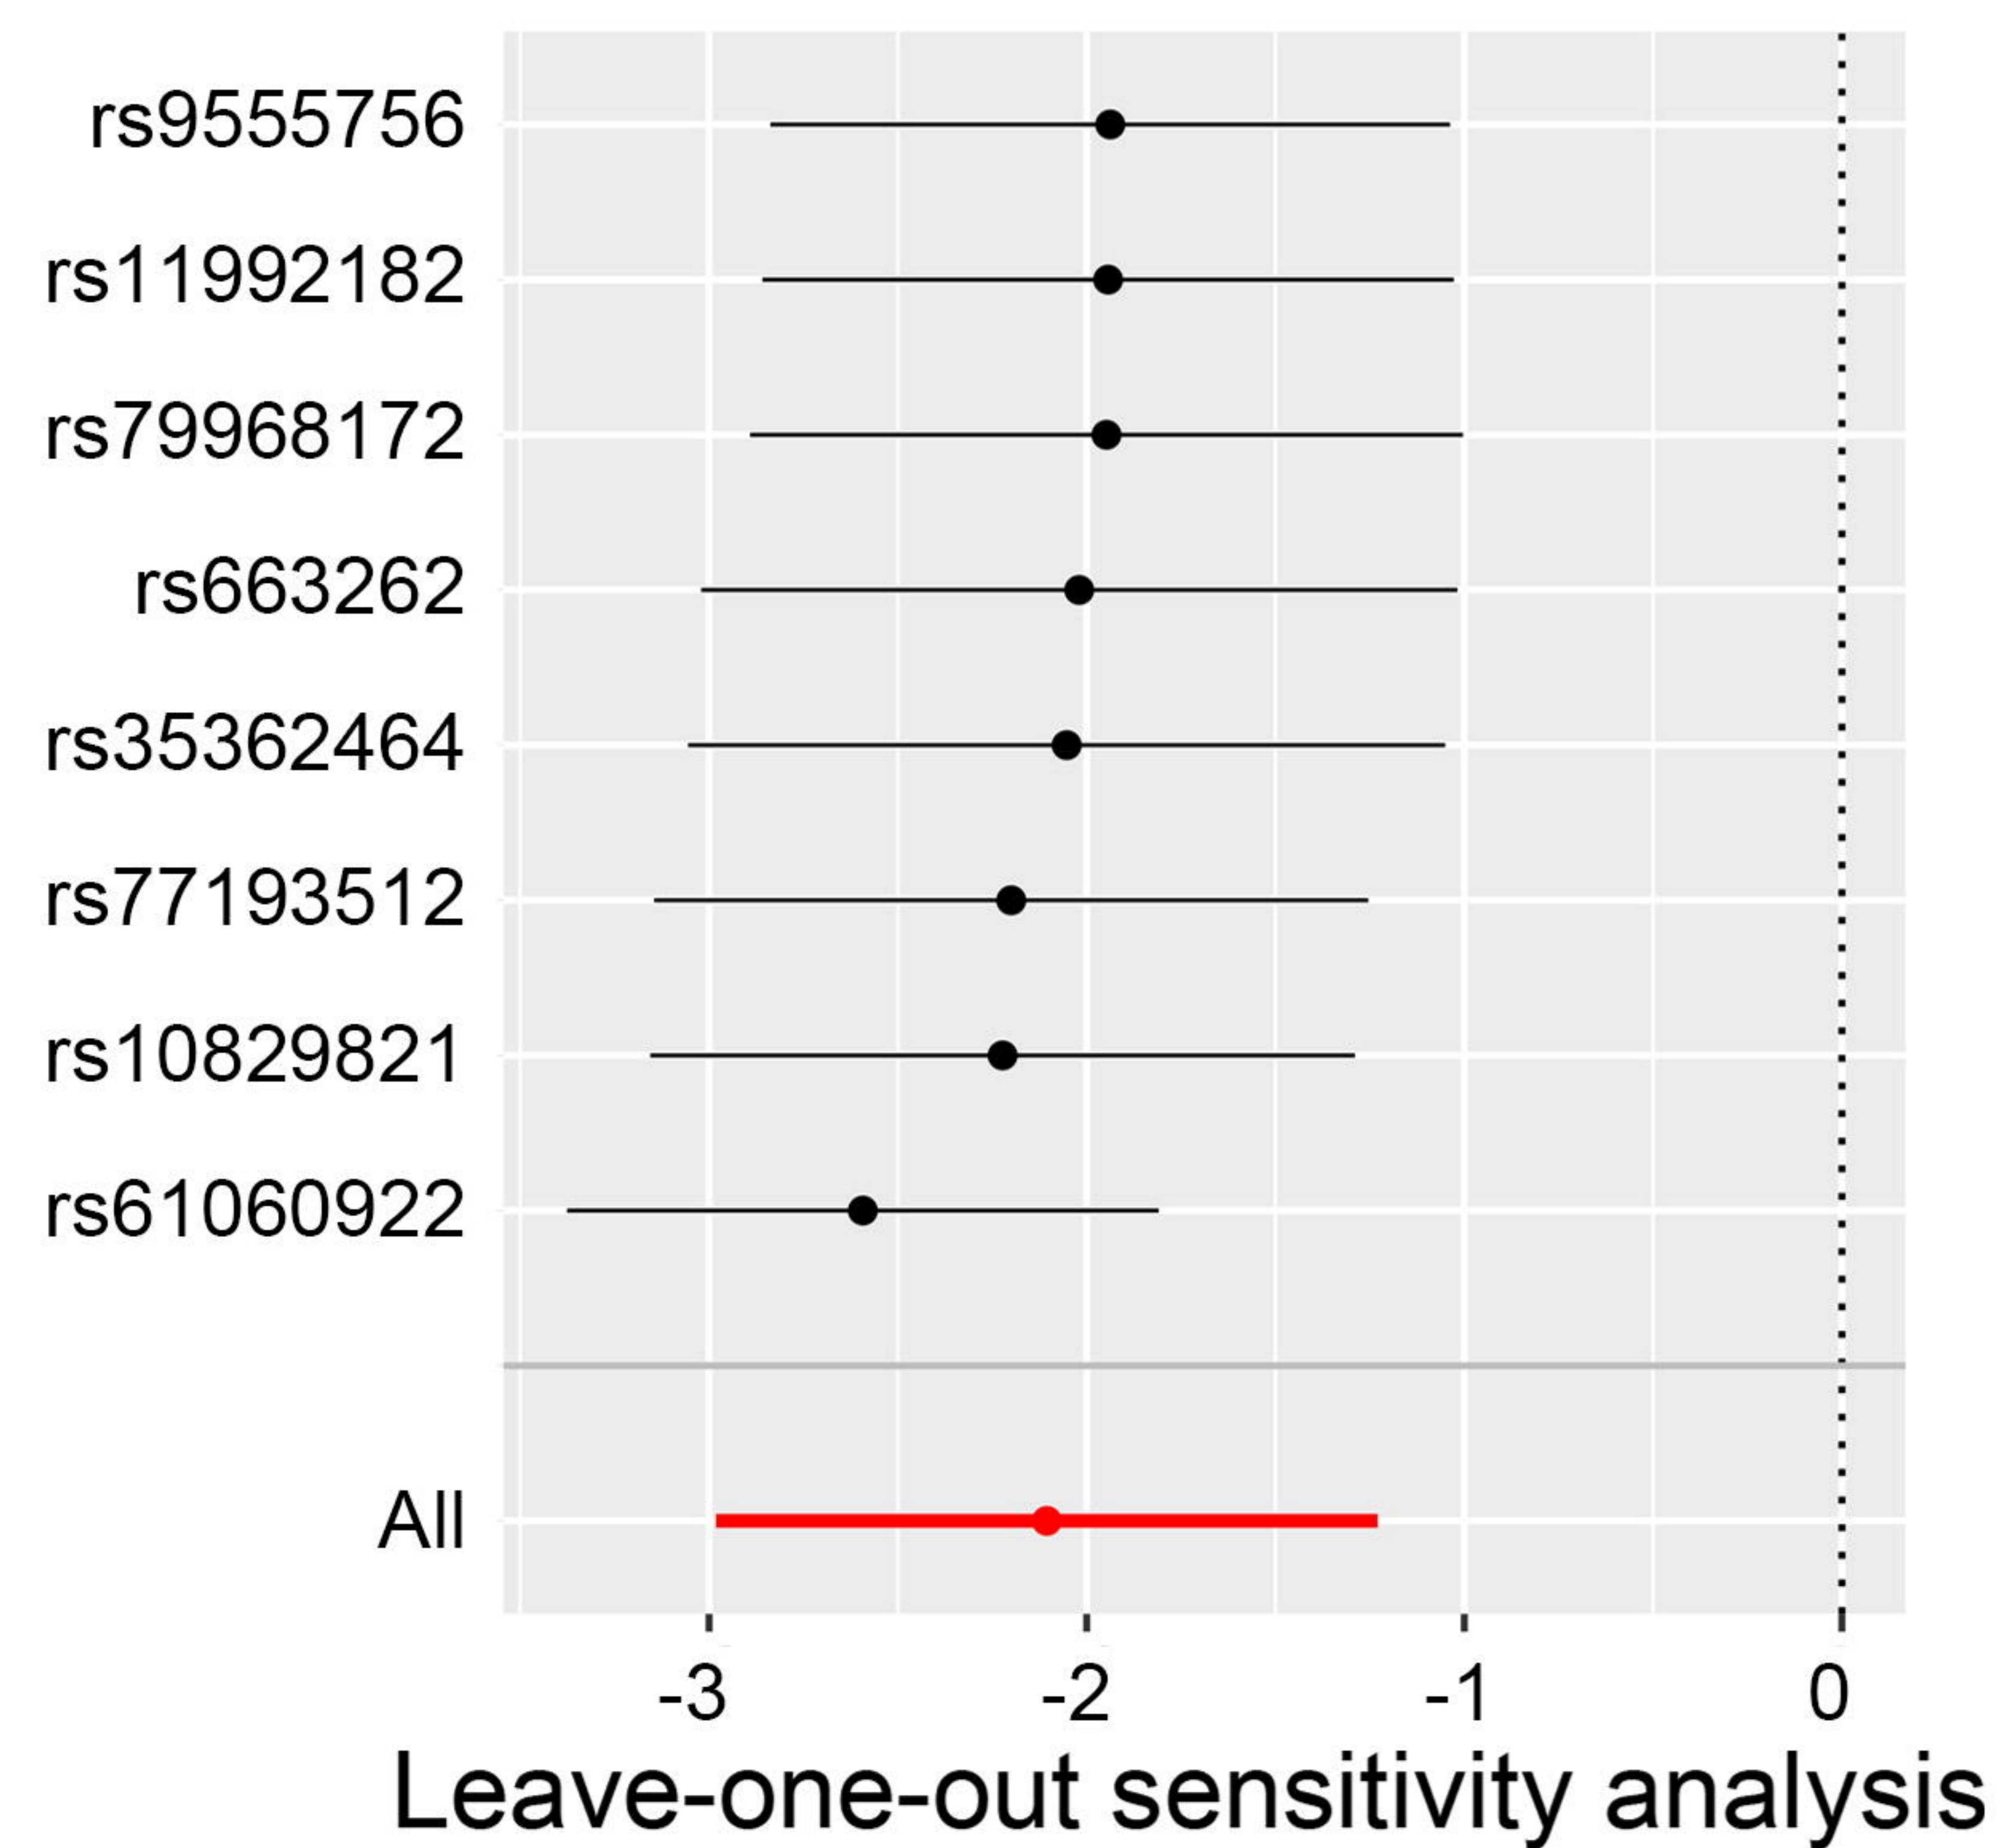

### *Coprococcus3*

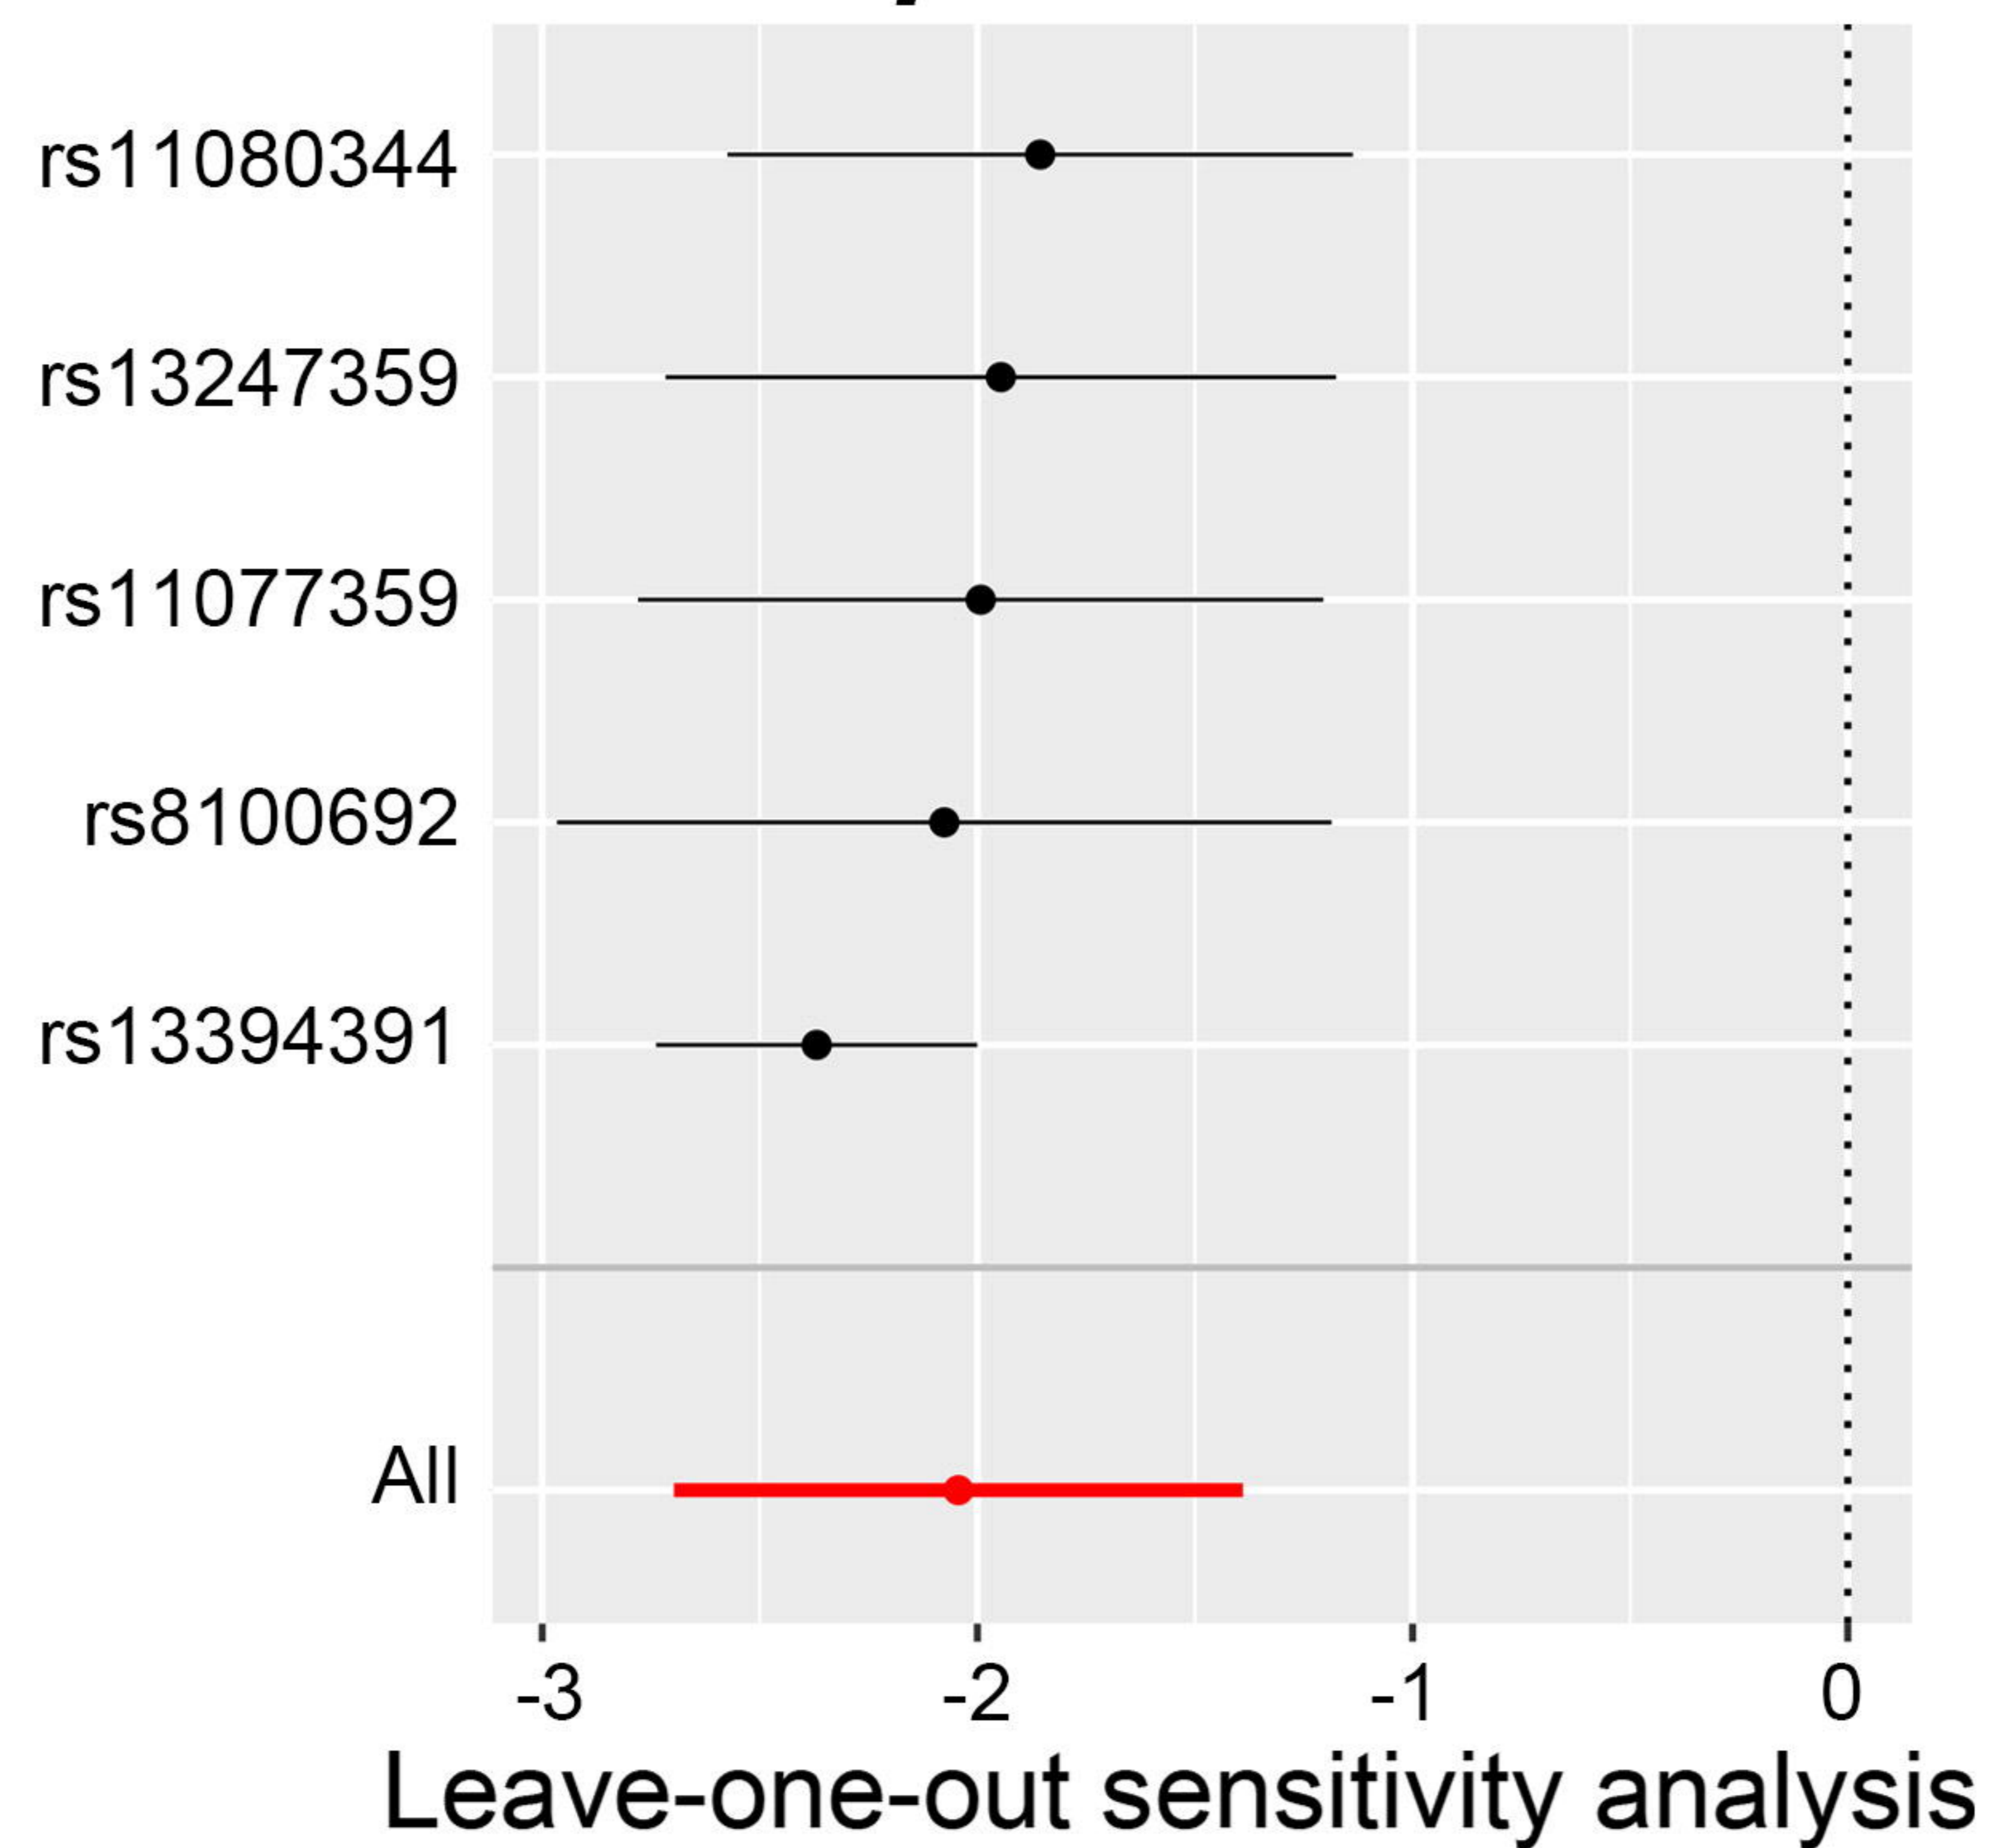

### *Anaerostipes*

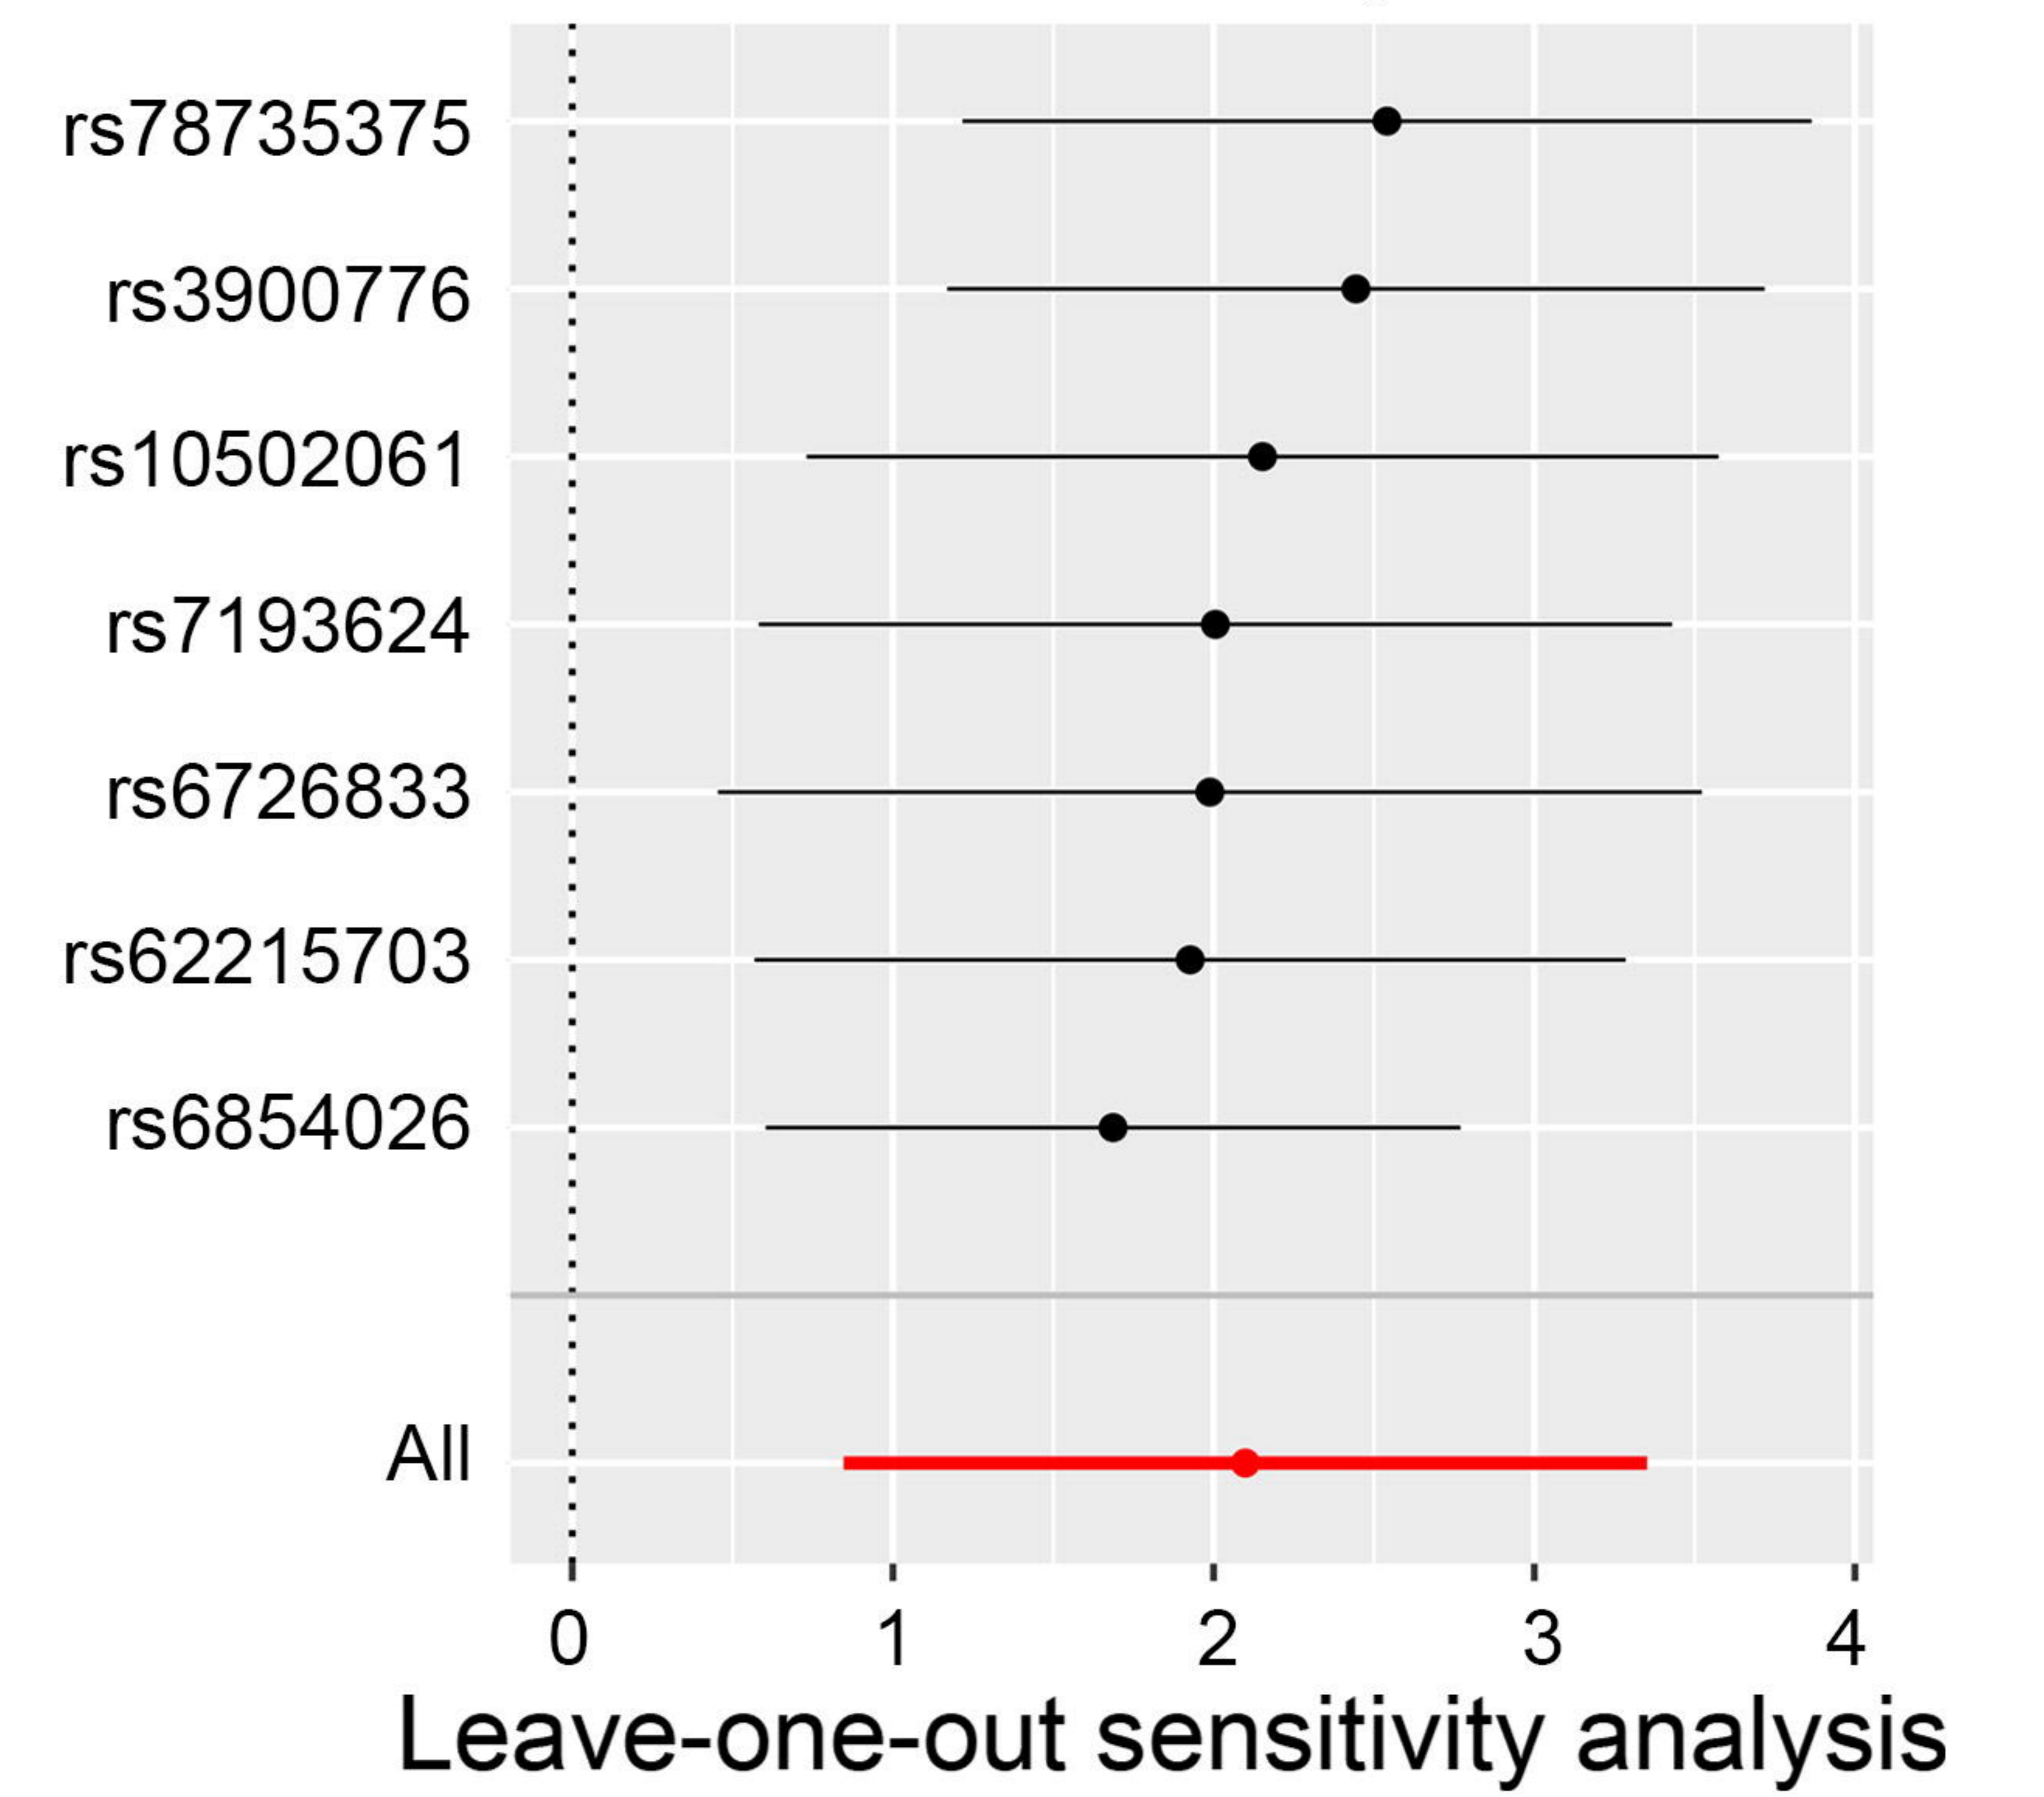

### *Akkermansia*

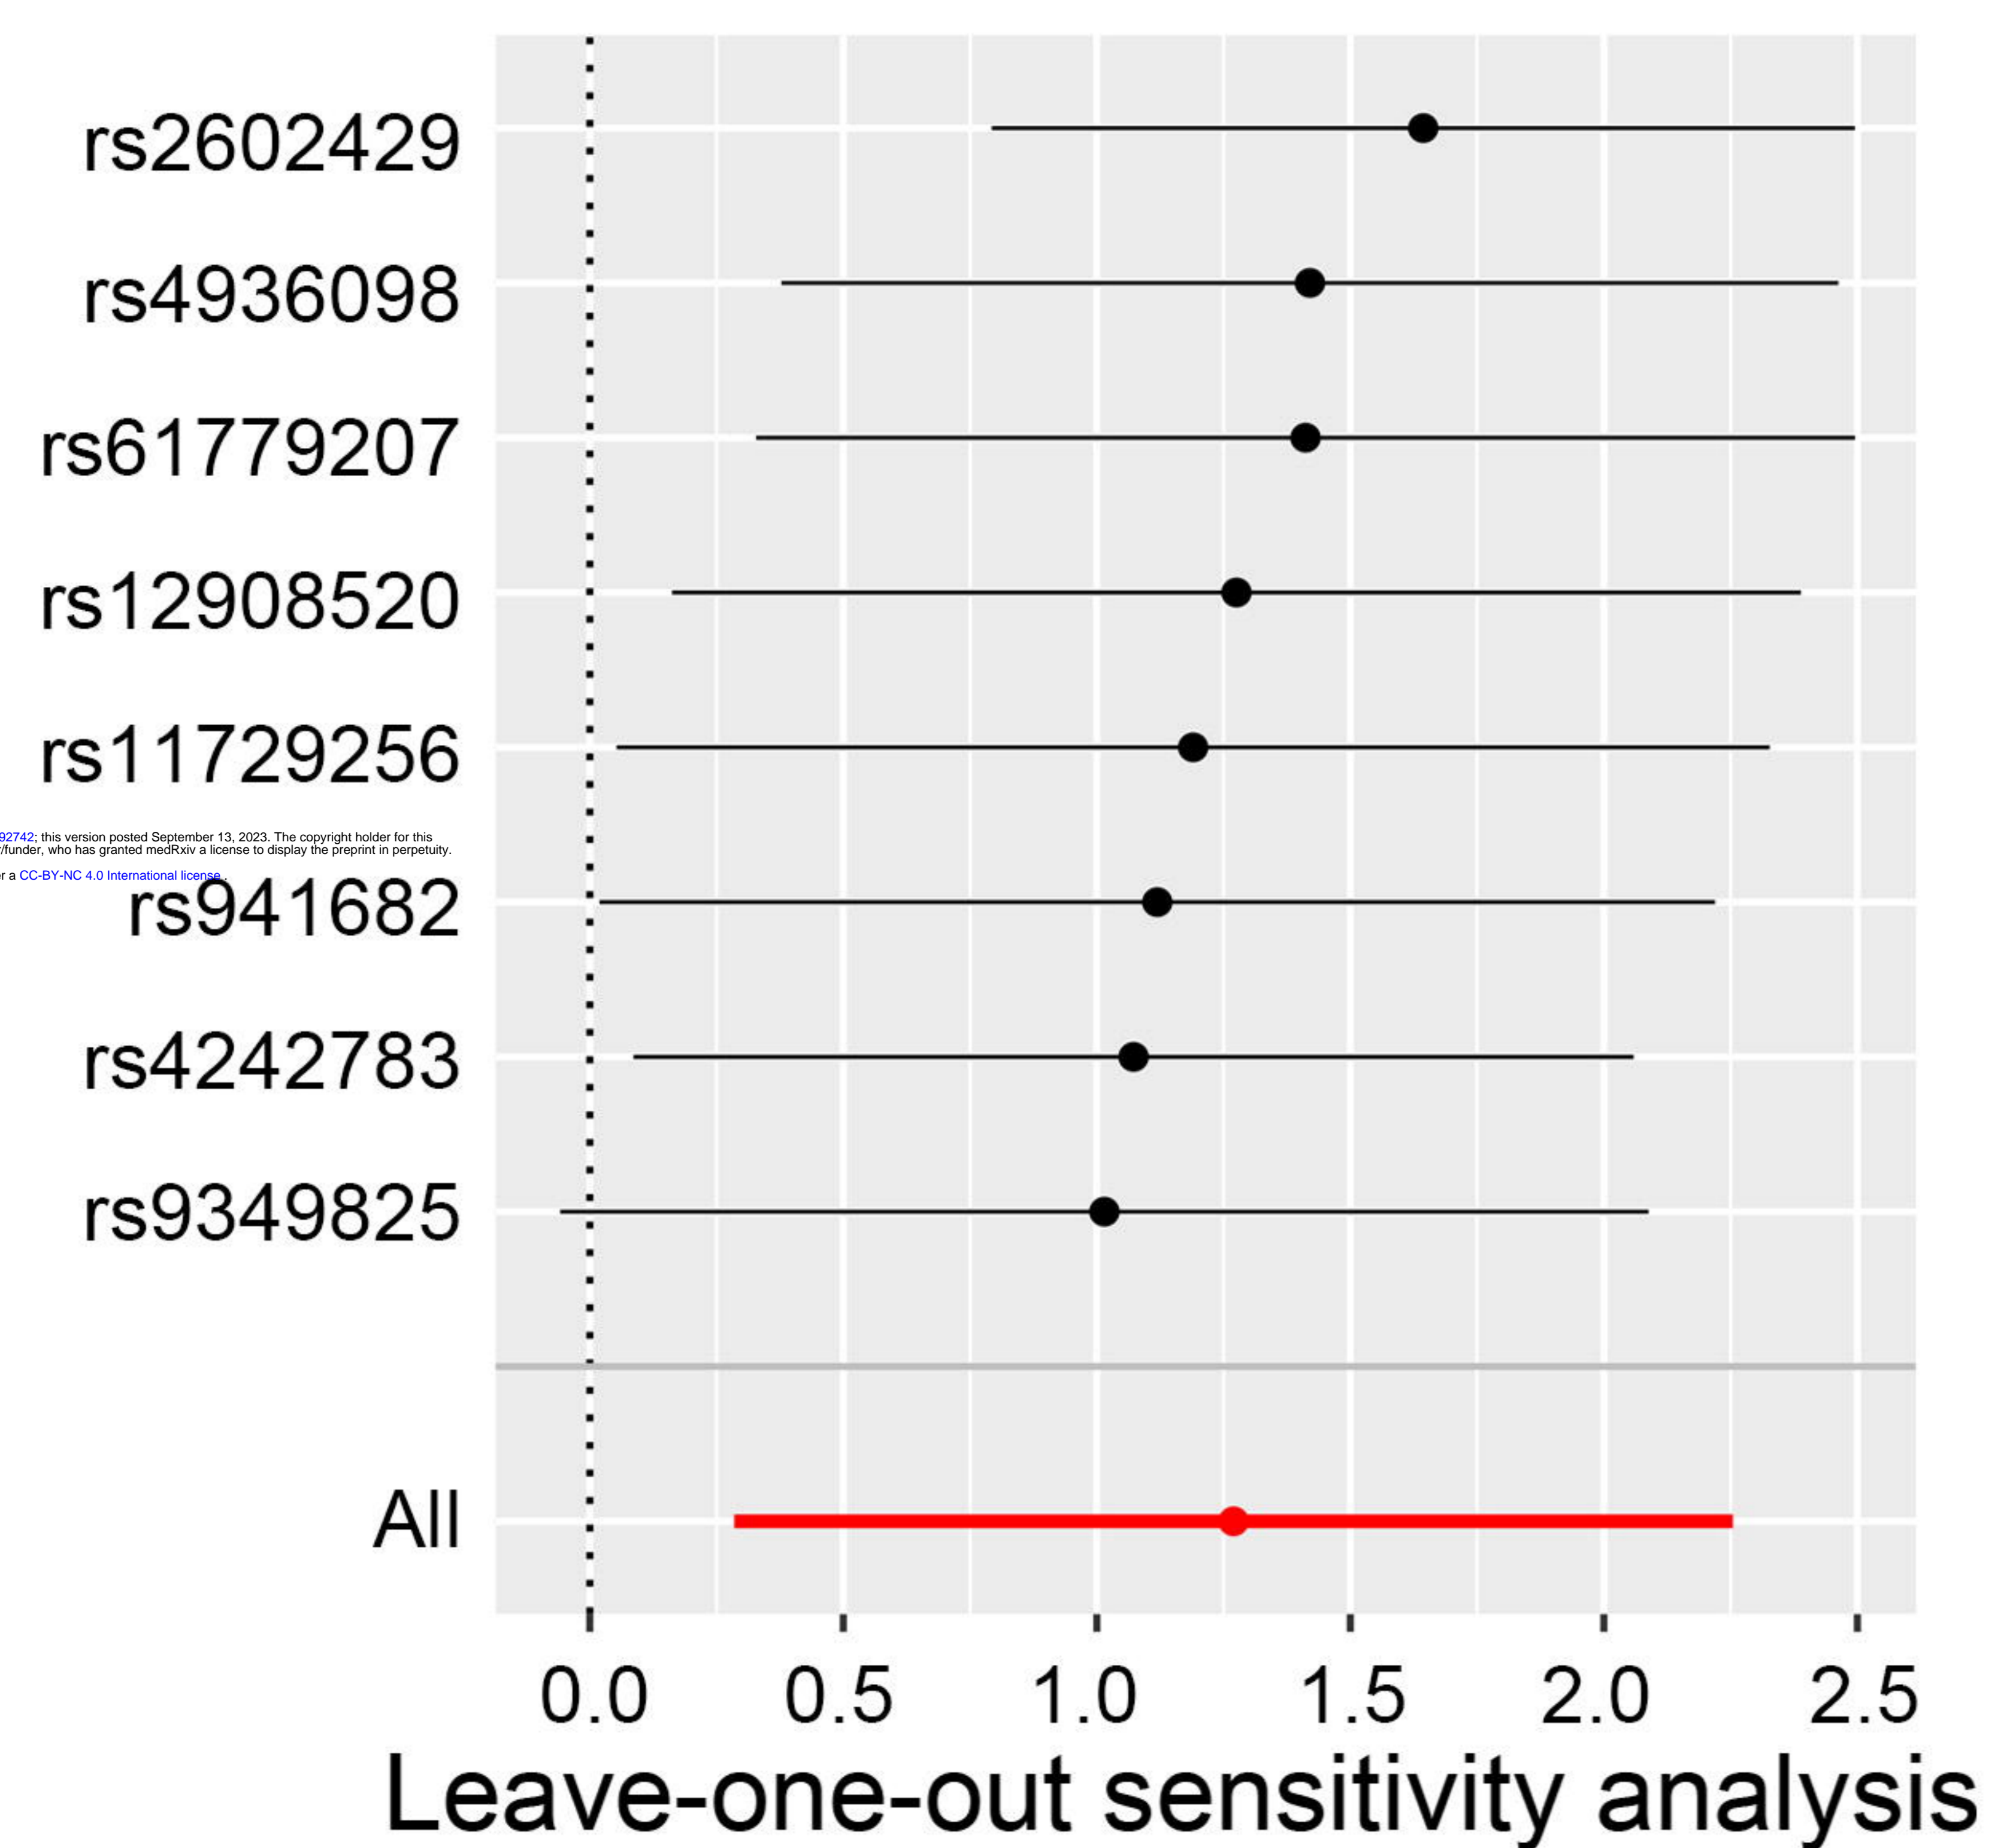

### *Collinsella*

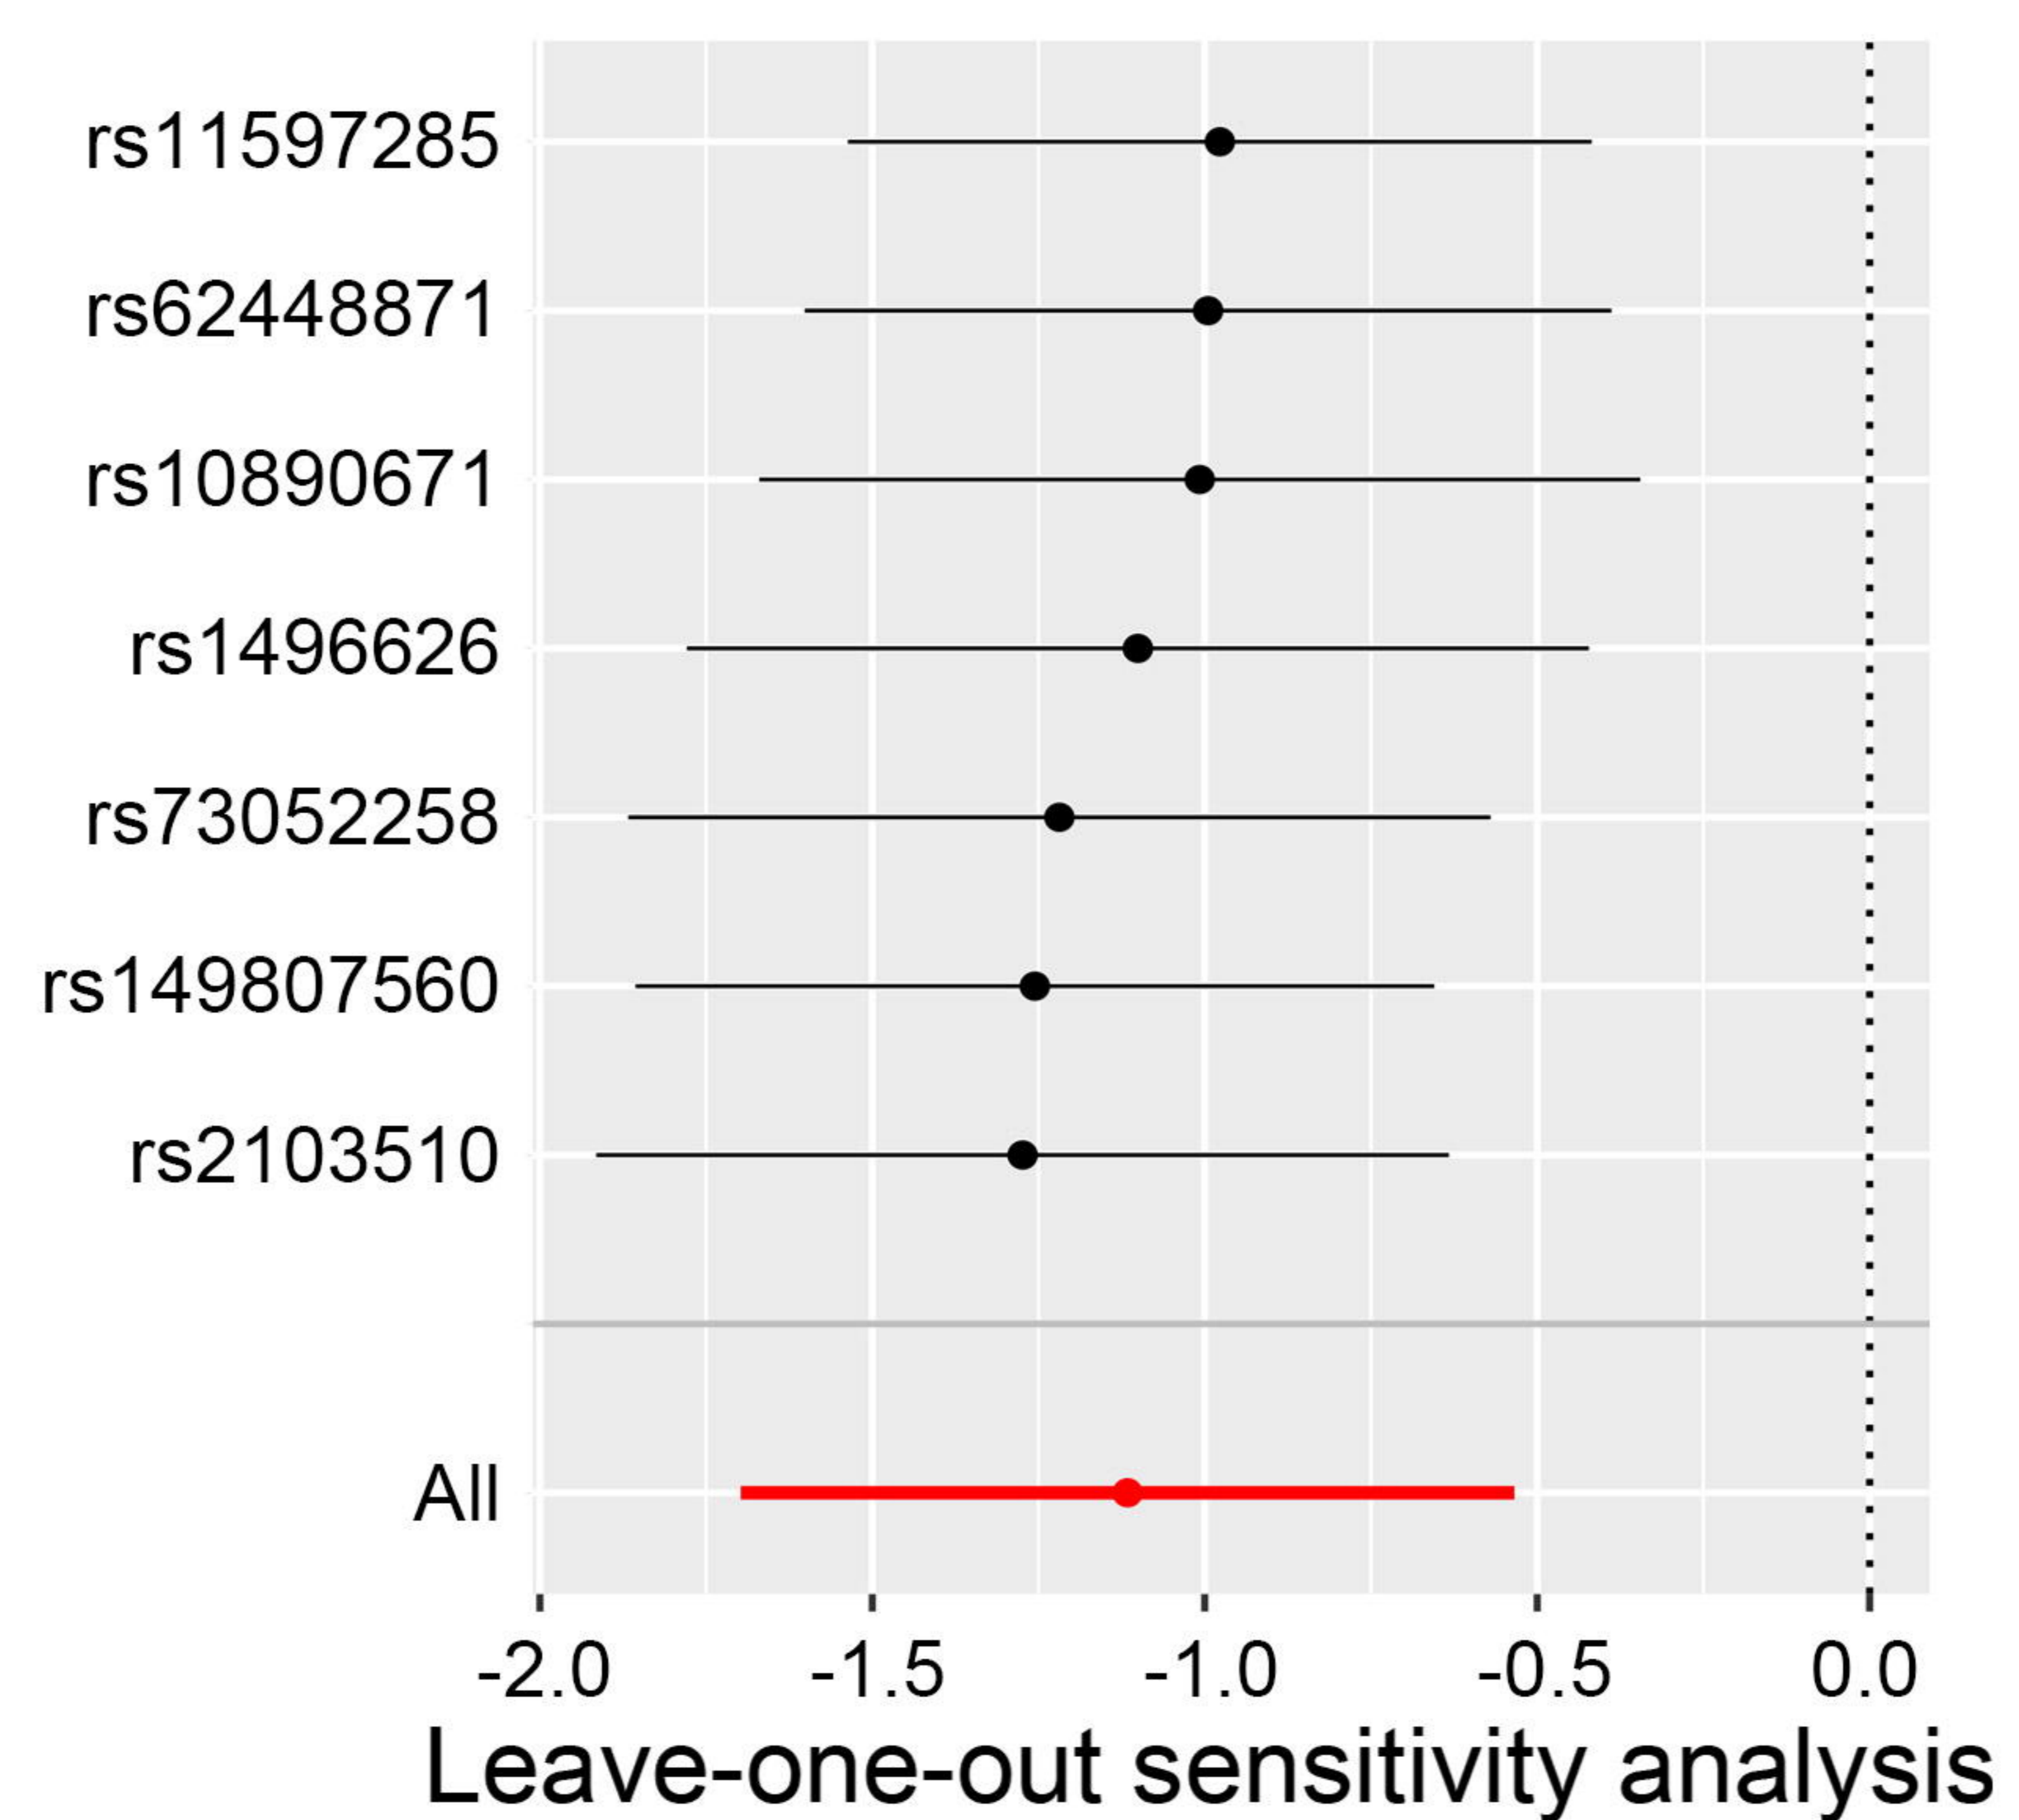

### *Eubacterium (fissicatena group)*

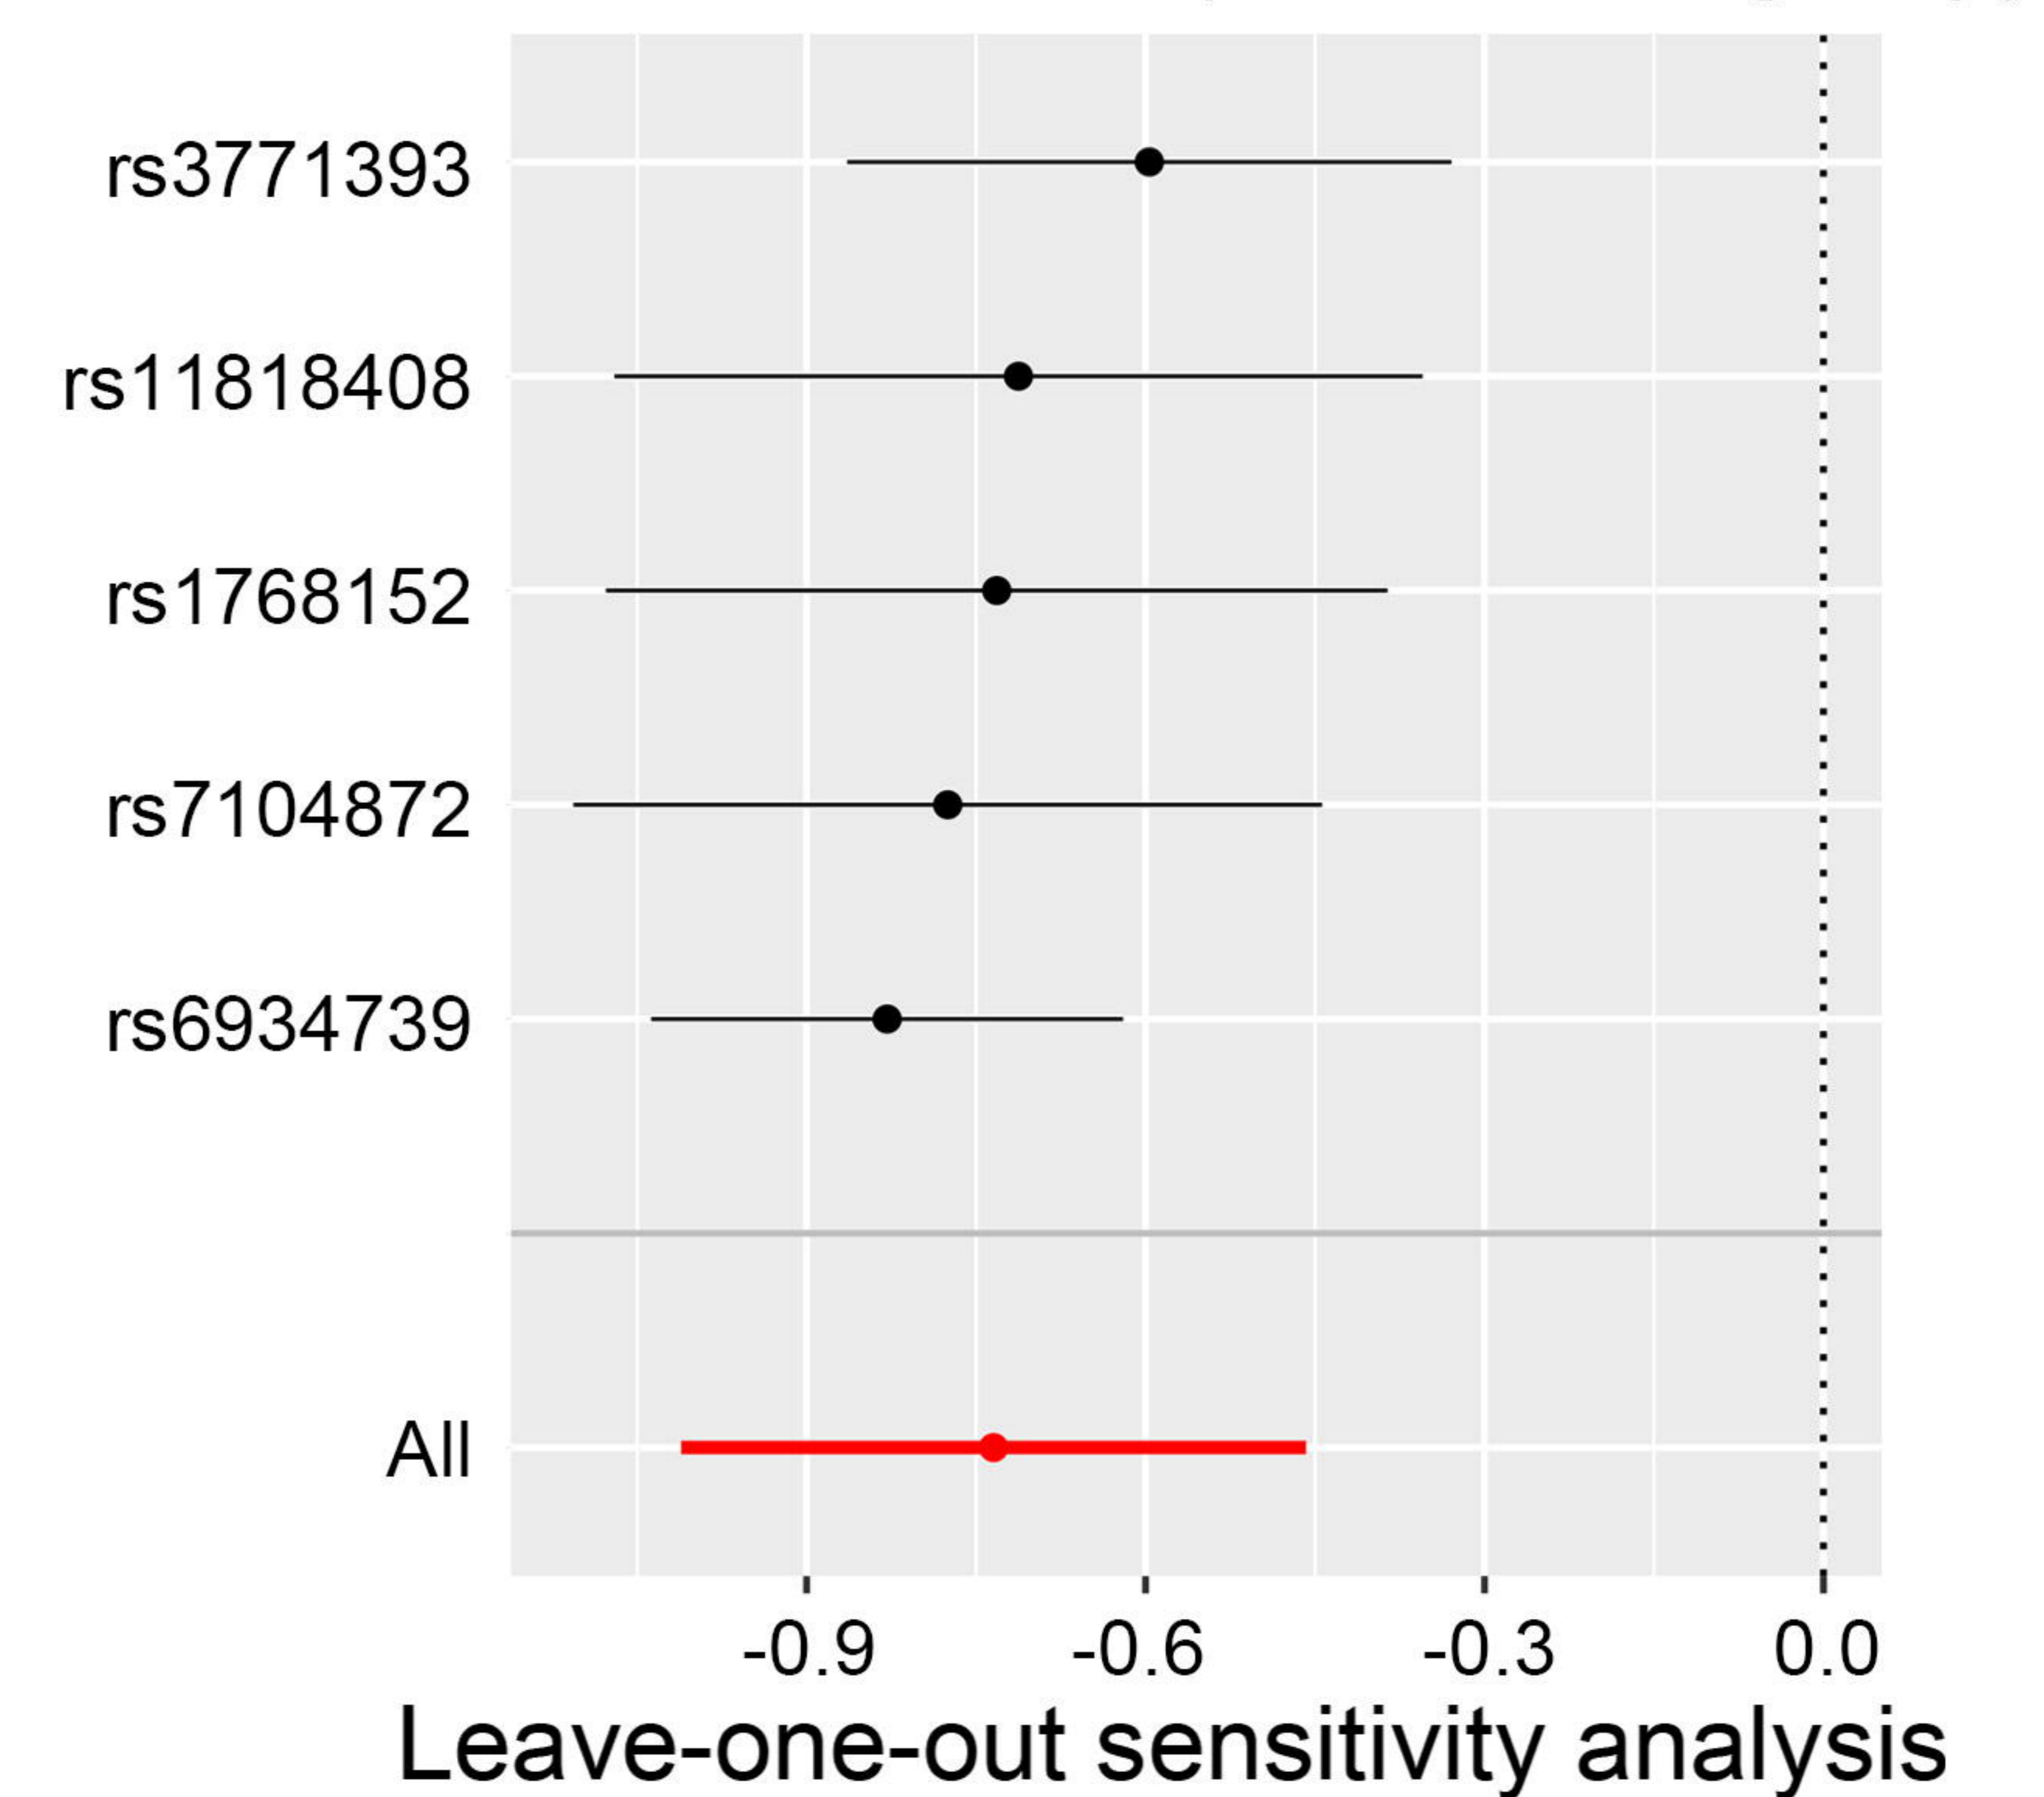

bioRxiv preprint doi: <https://doi.org/10.1101/2021.07.24.242024>; this version posted September 13, 2020. The copyright holder for this preprint (which was not certified by peer review) is the author/funder, who has granted bioRxiv a license to display the preprint in perpetuity. It is made available under aCC-BY-NC 4.0 International license.



# All-grade irAEs

## Family level

### *Lachnospiraceae*

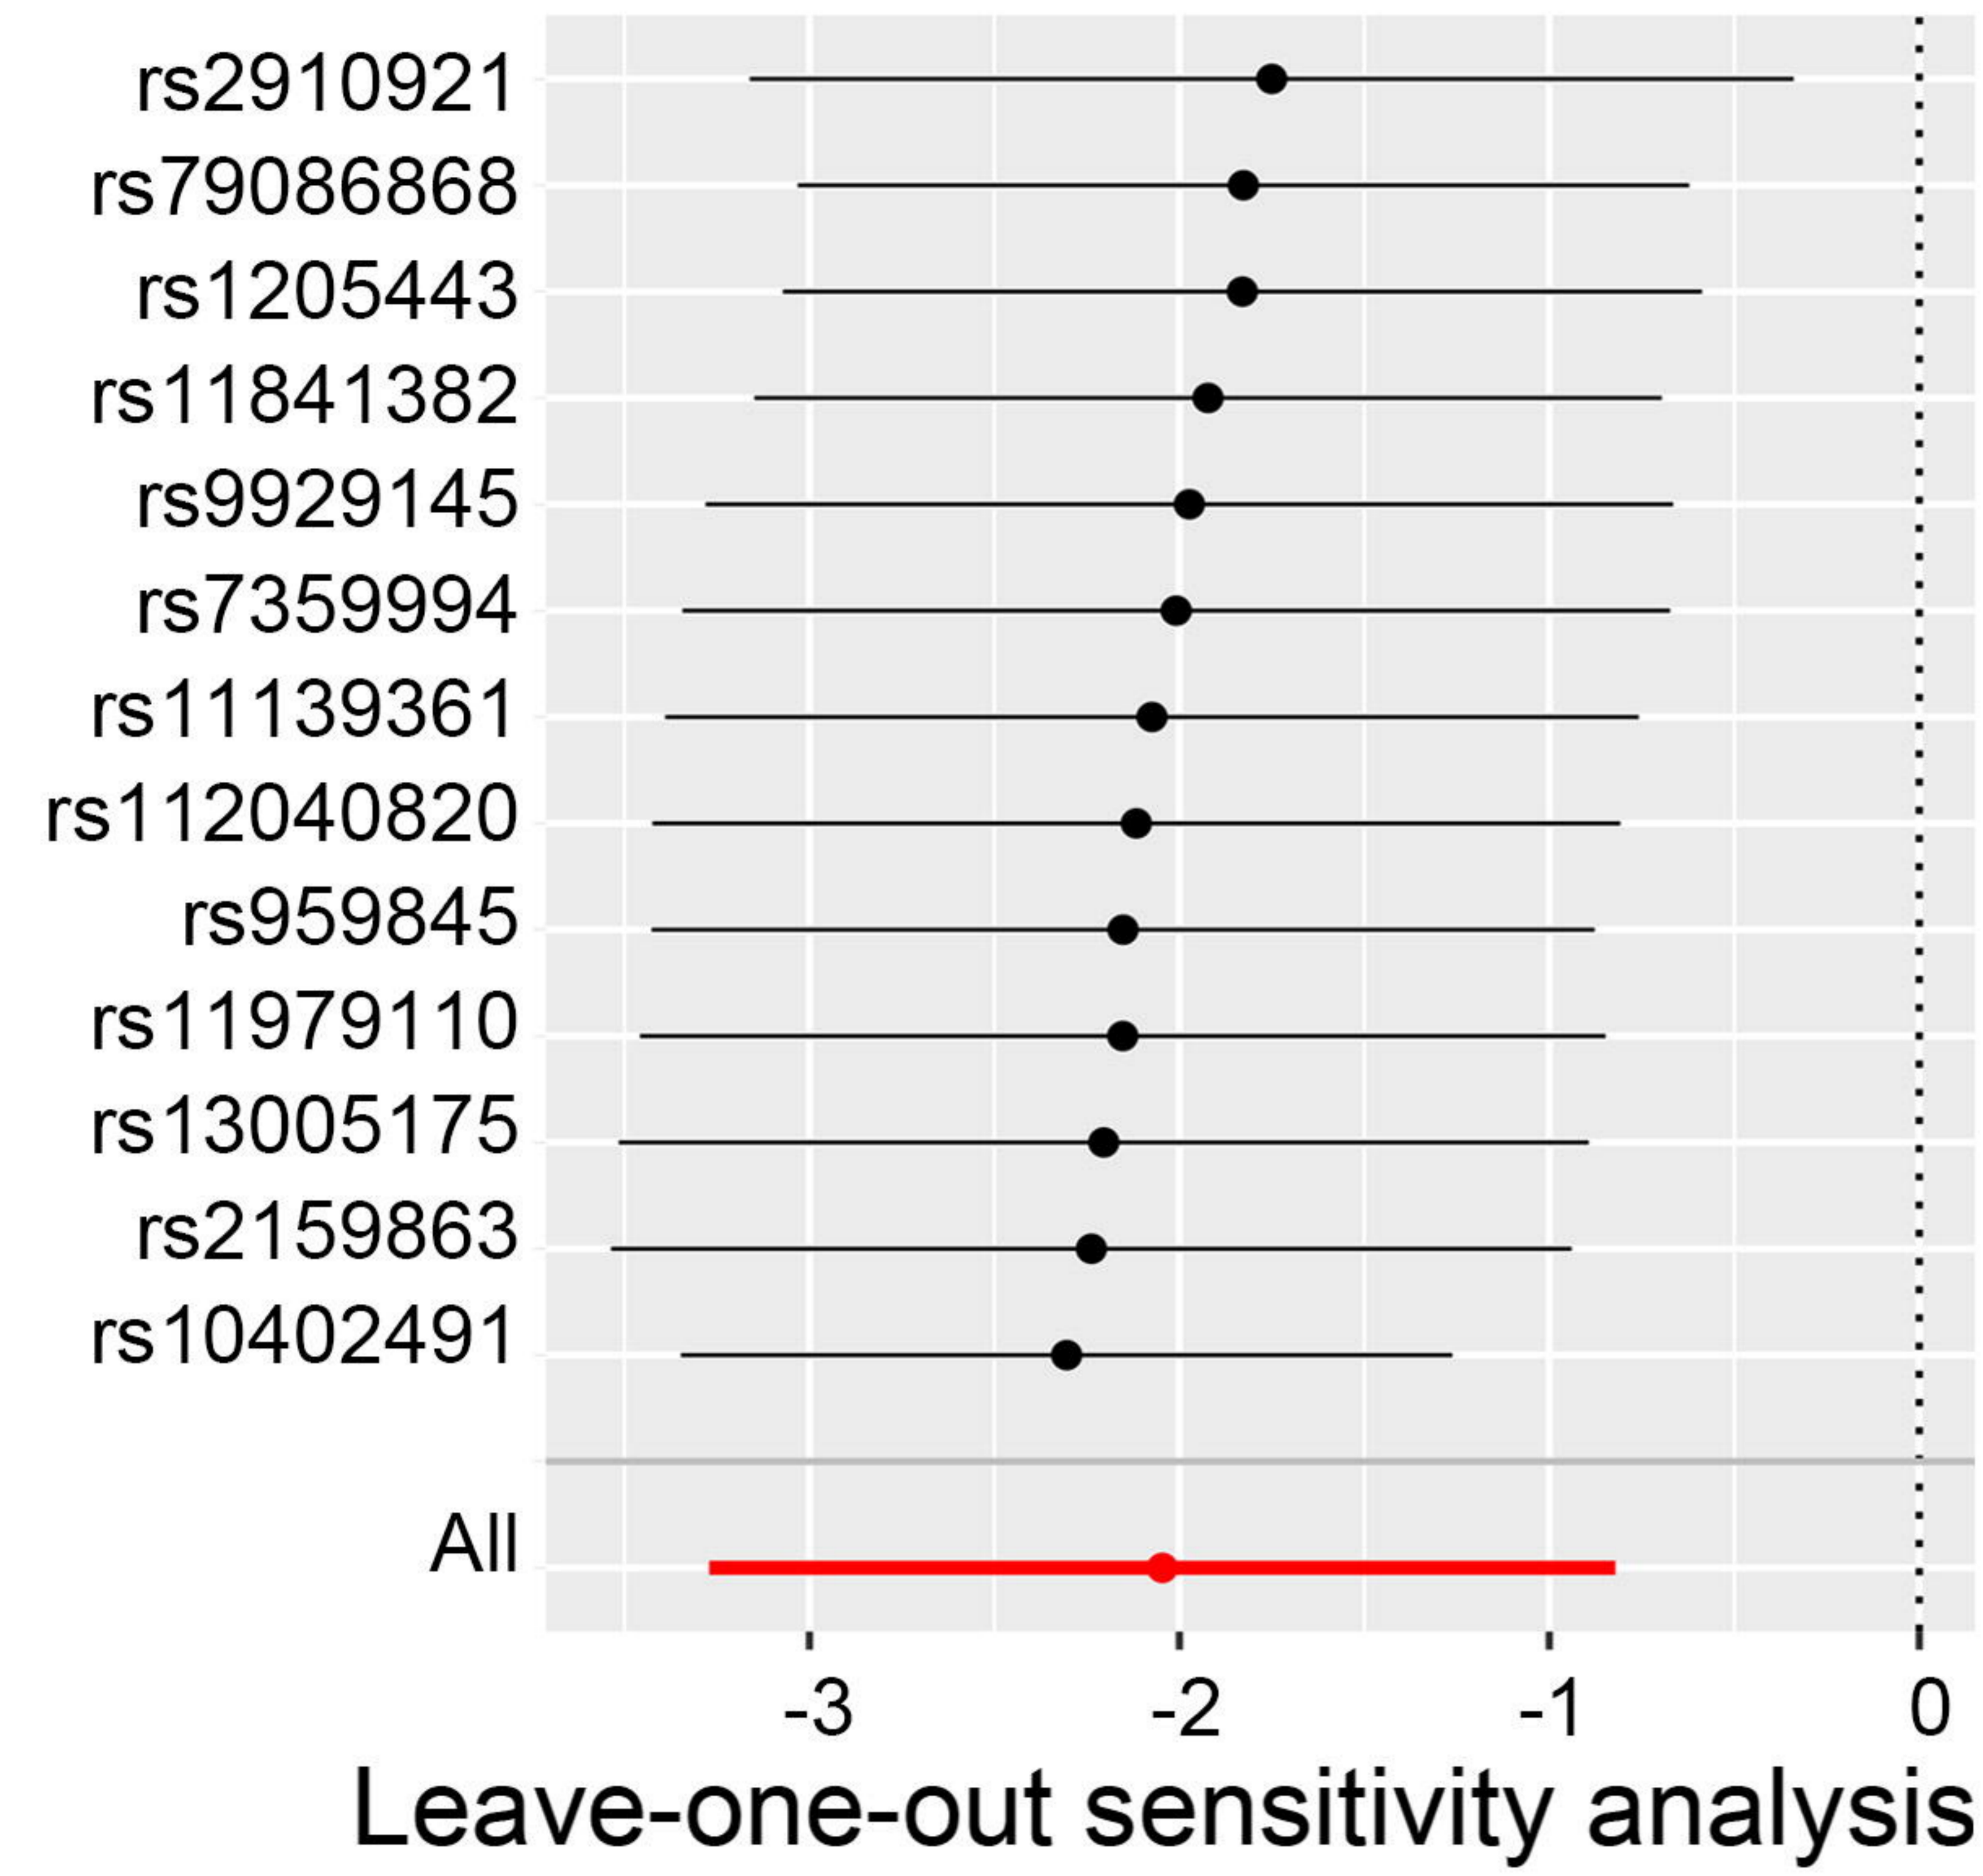

### *Porphyromonadaceae*

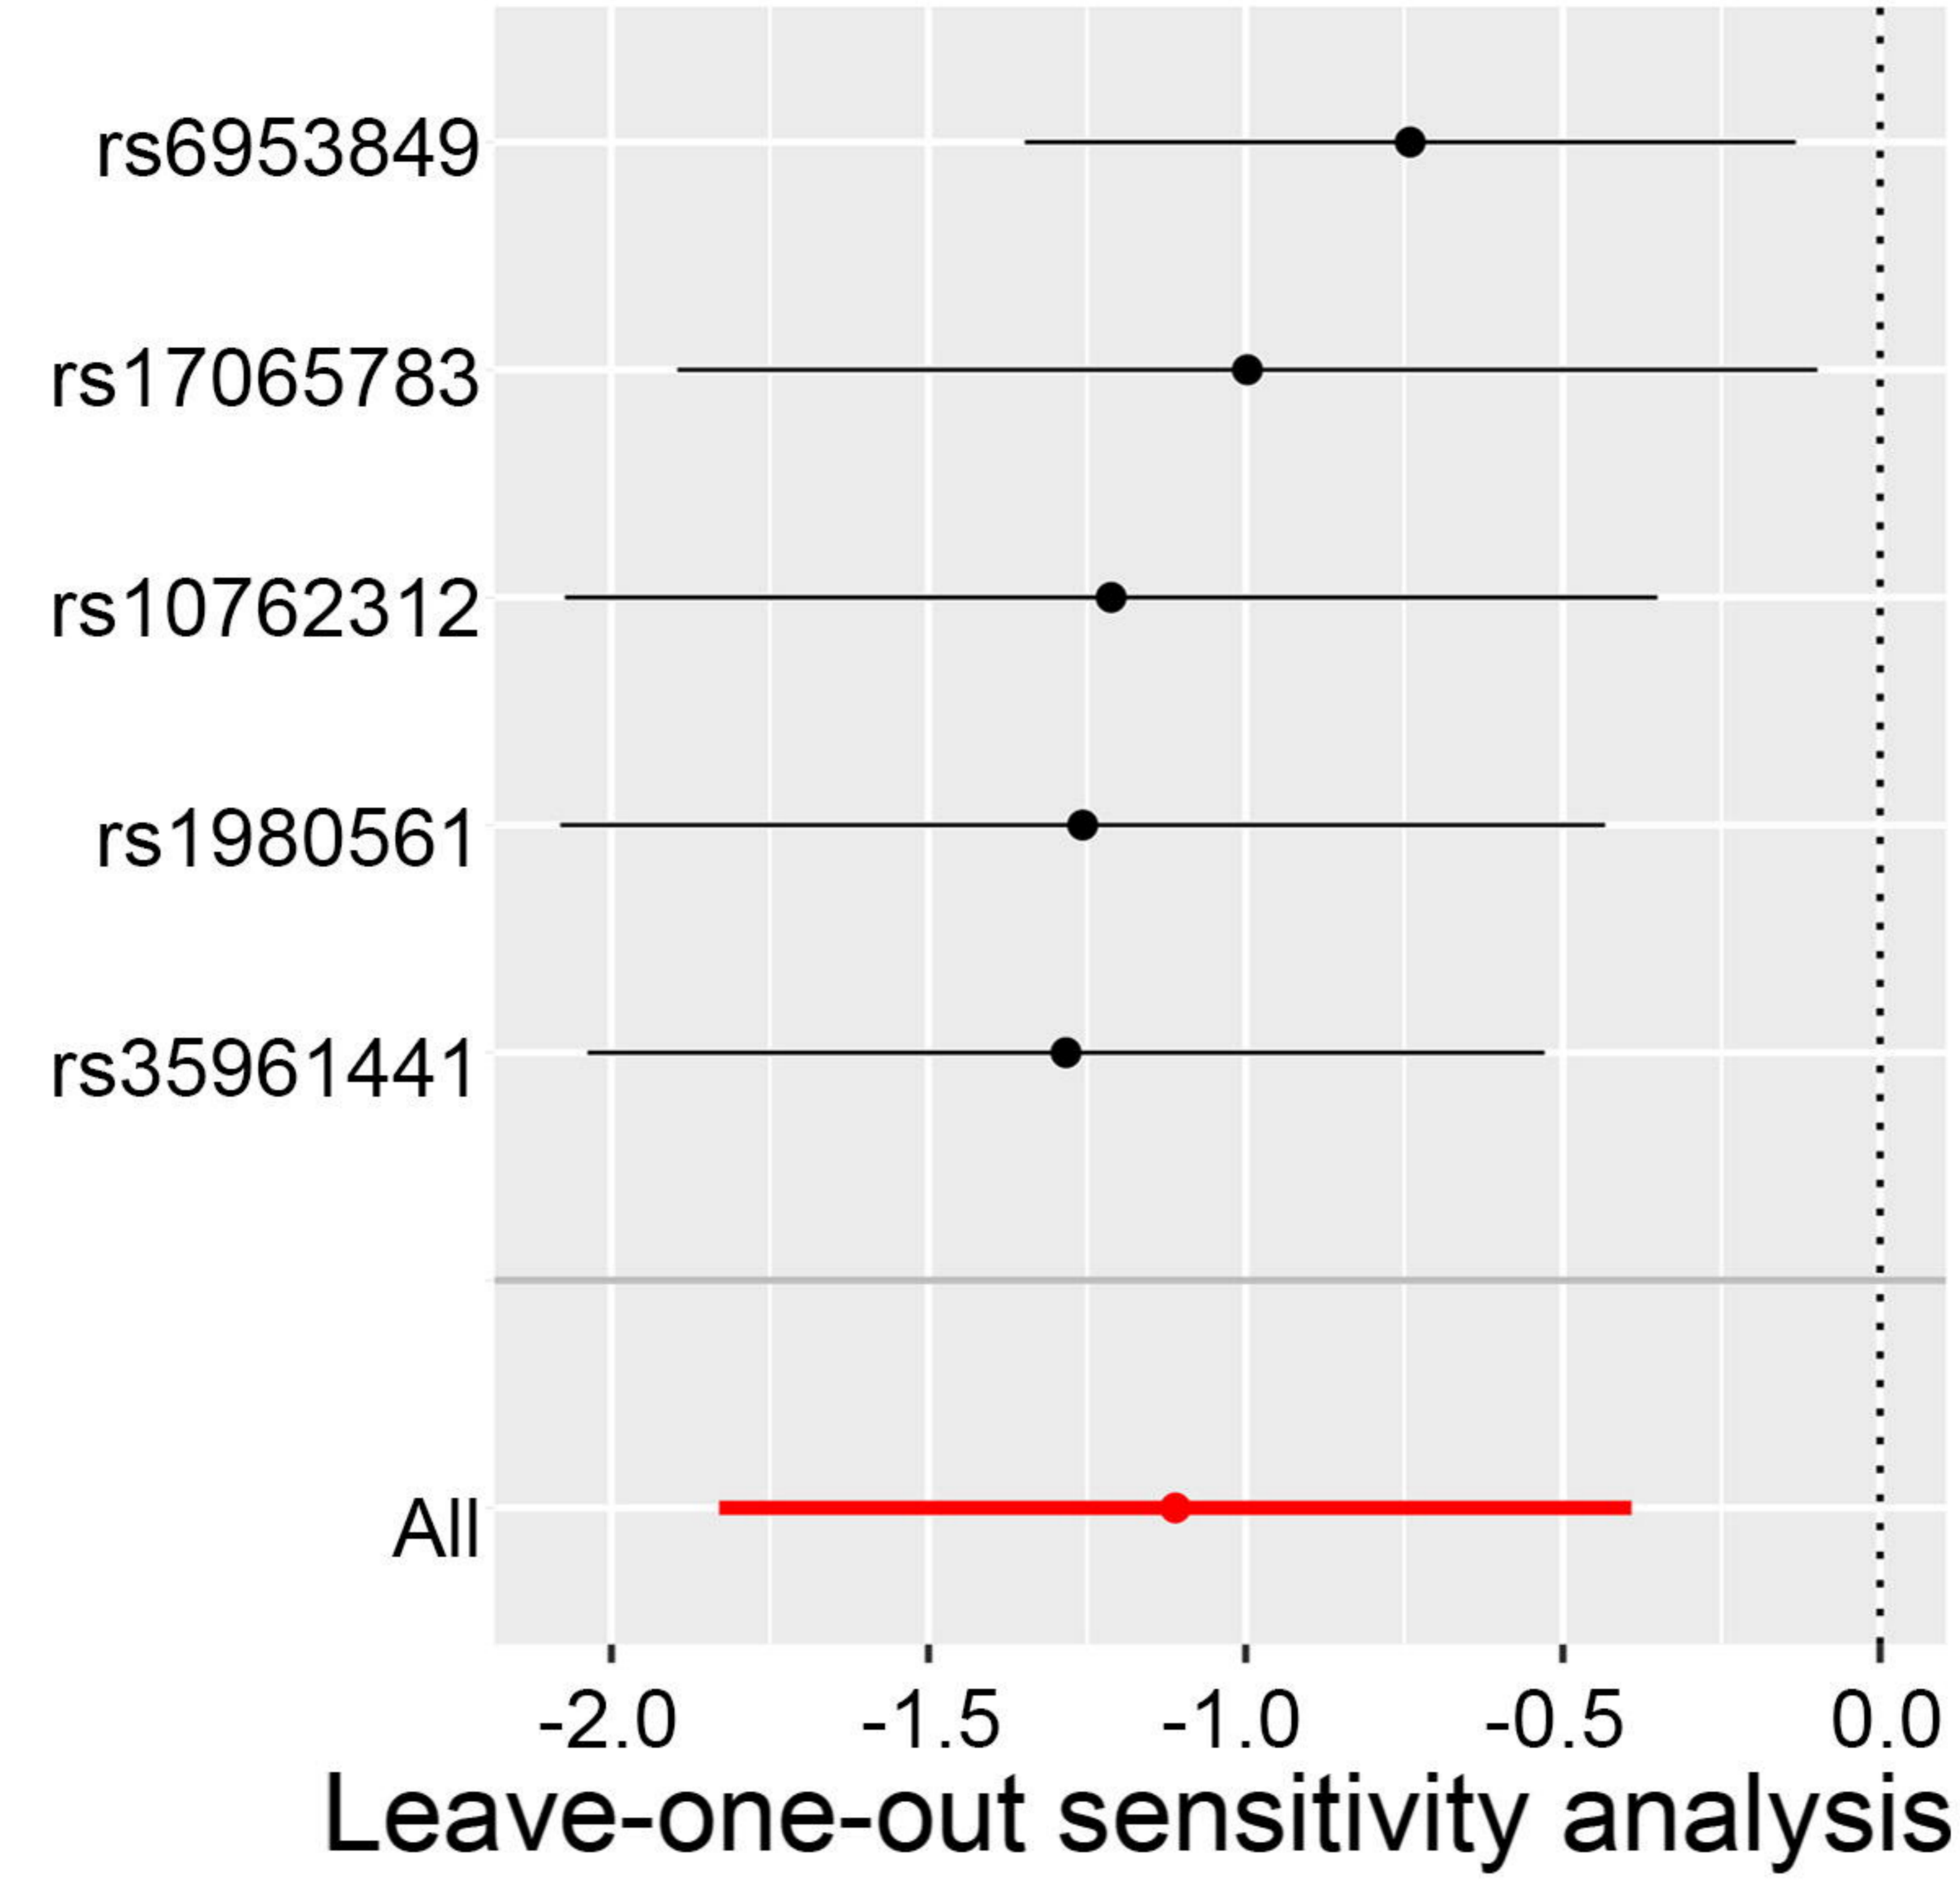

## Genus level

### *Roseburia*

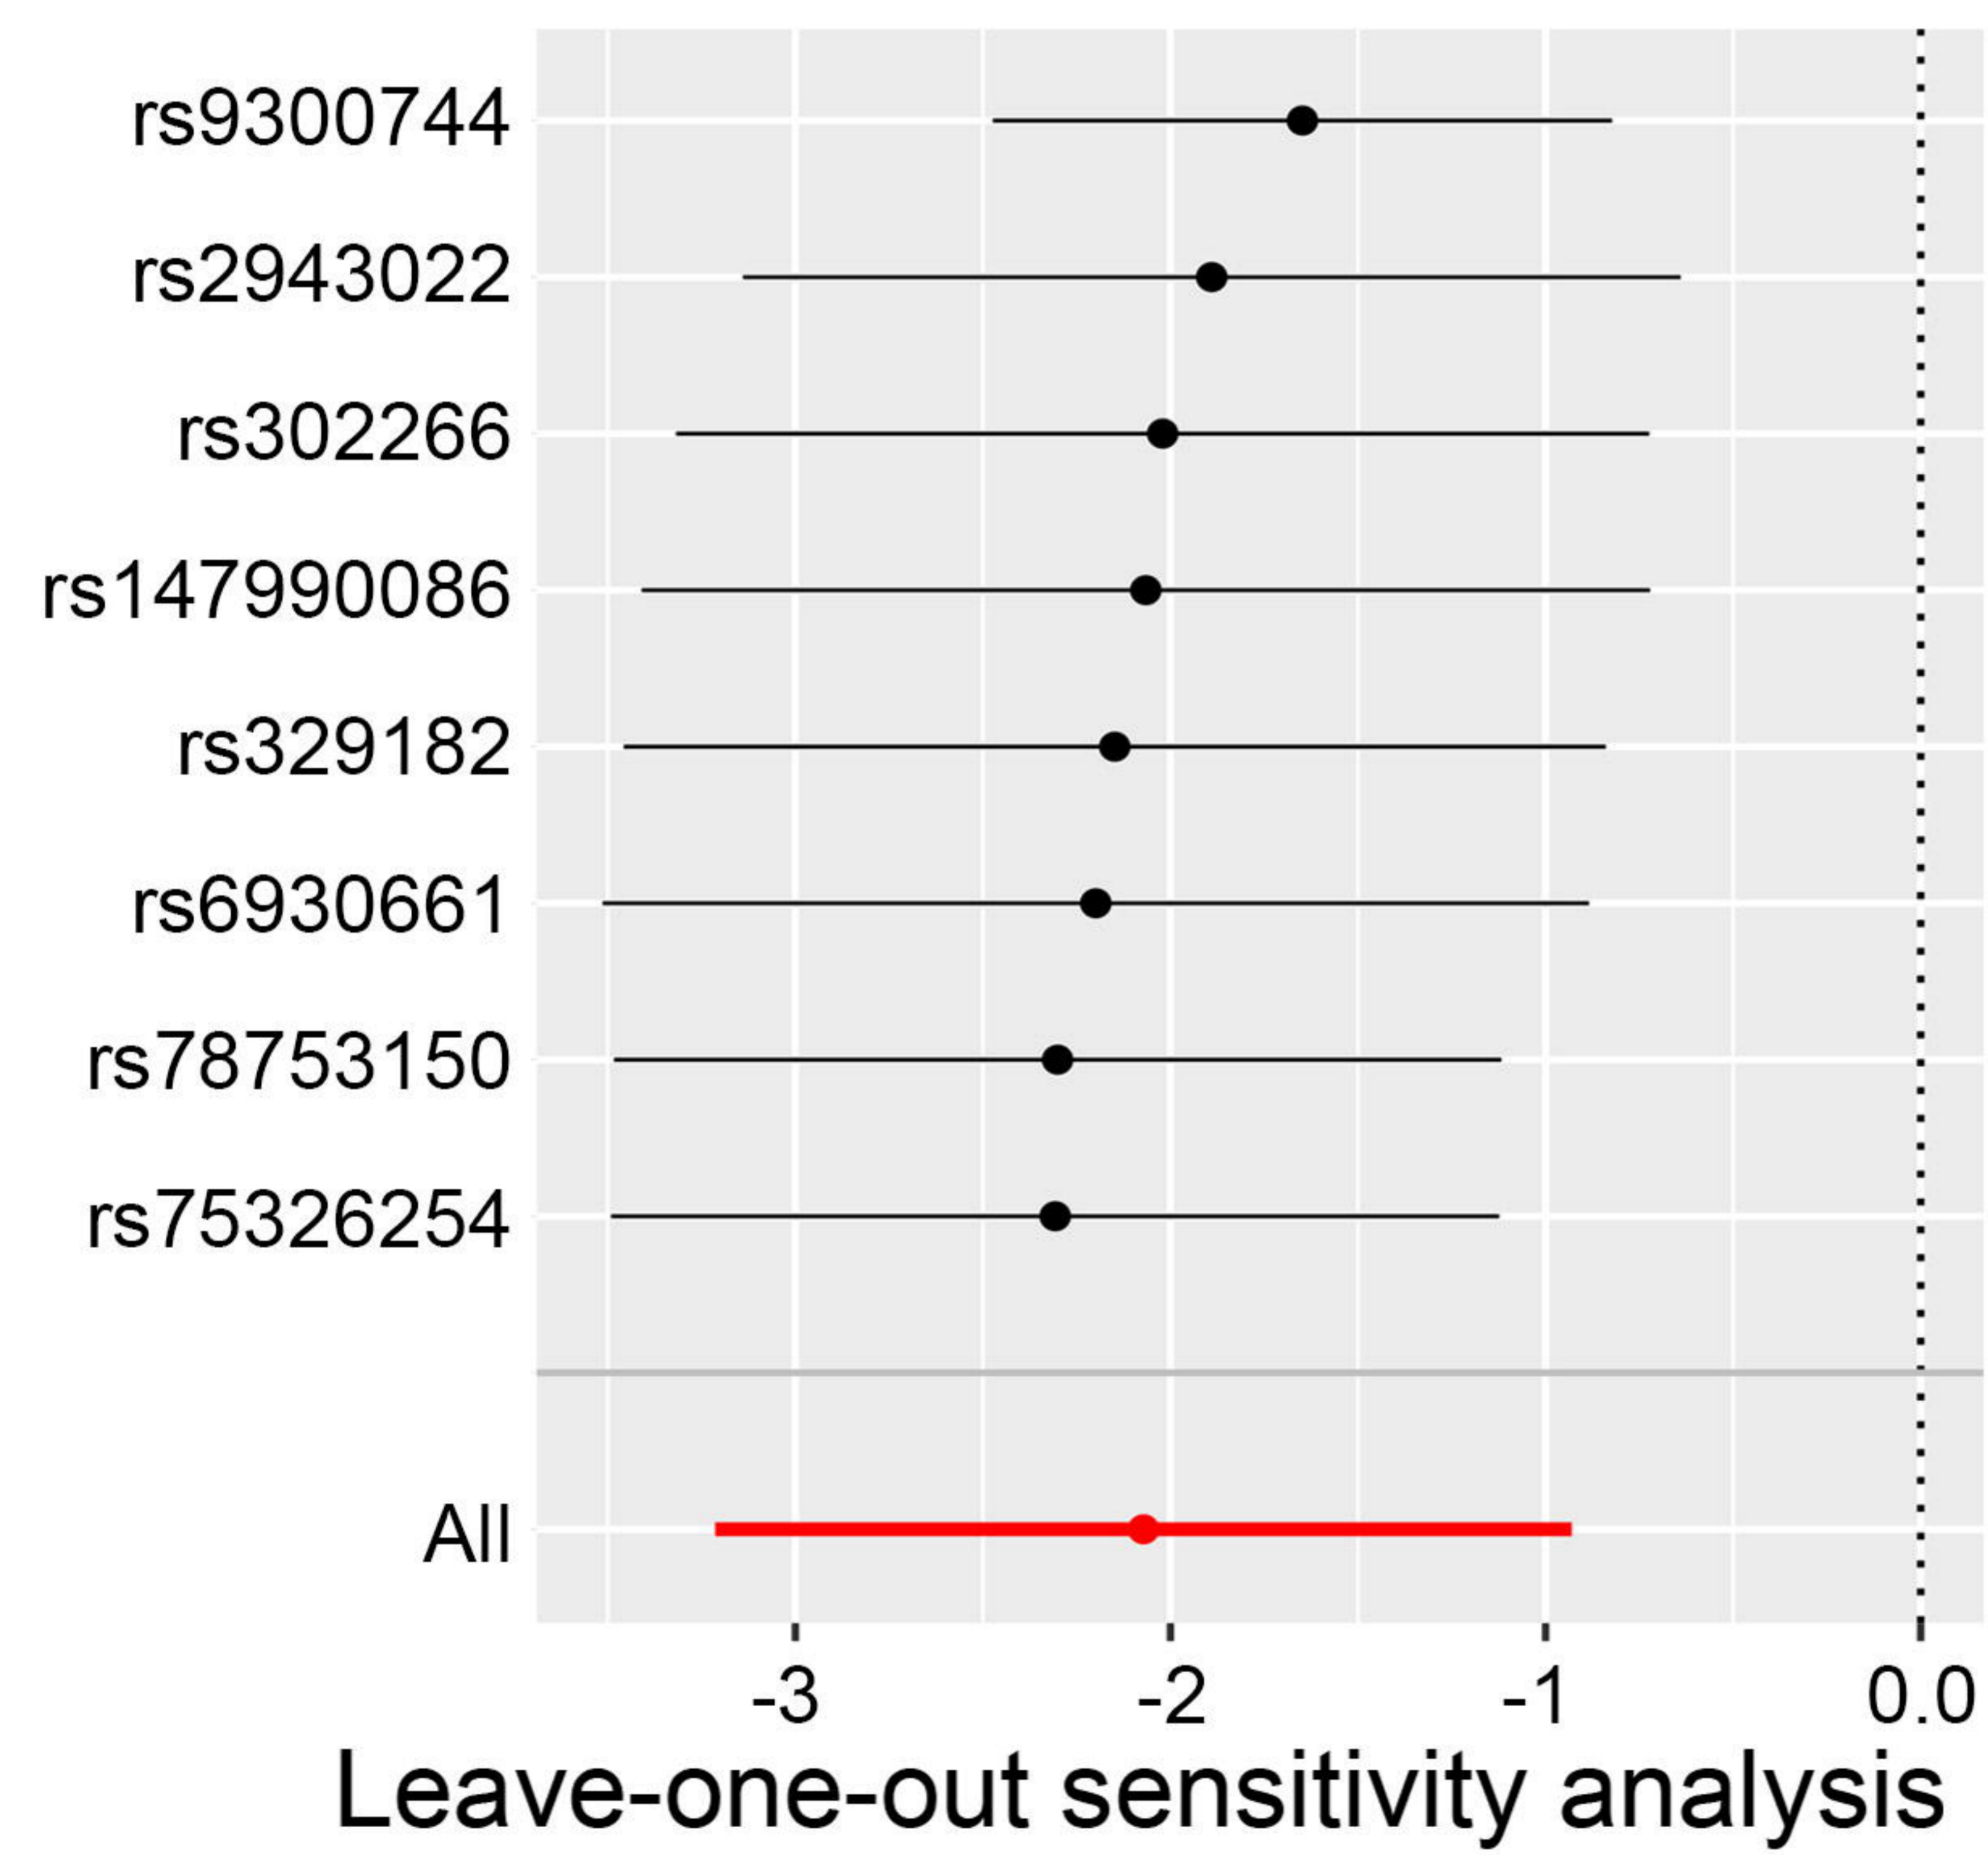

### *Ruminococcaceae* UCG004

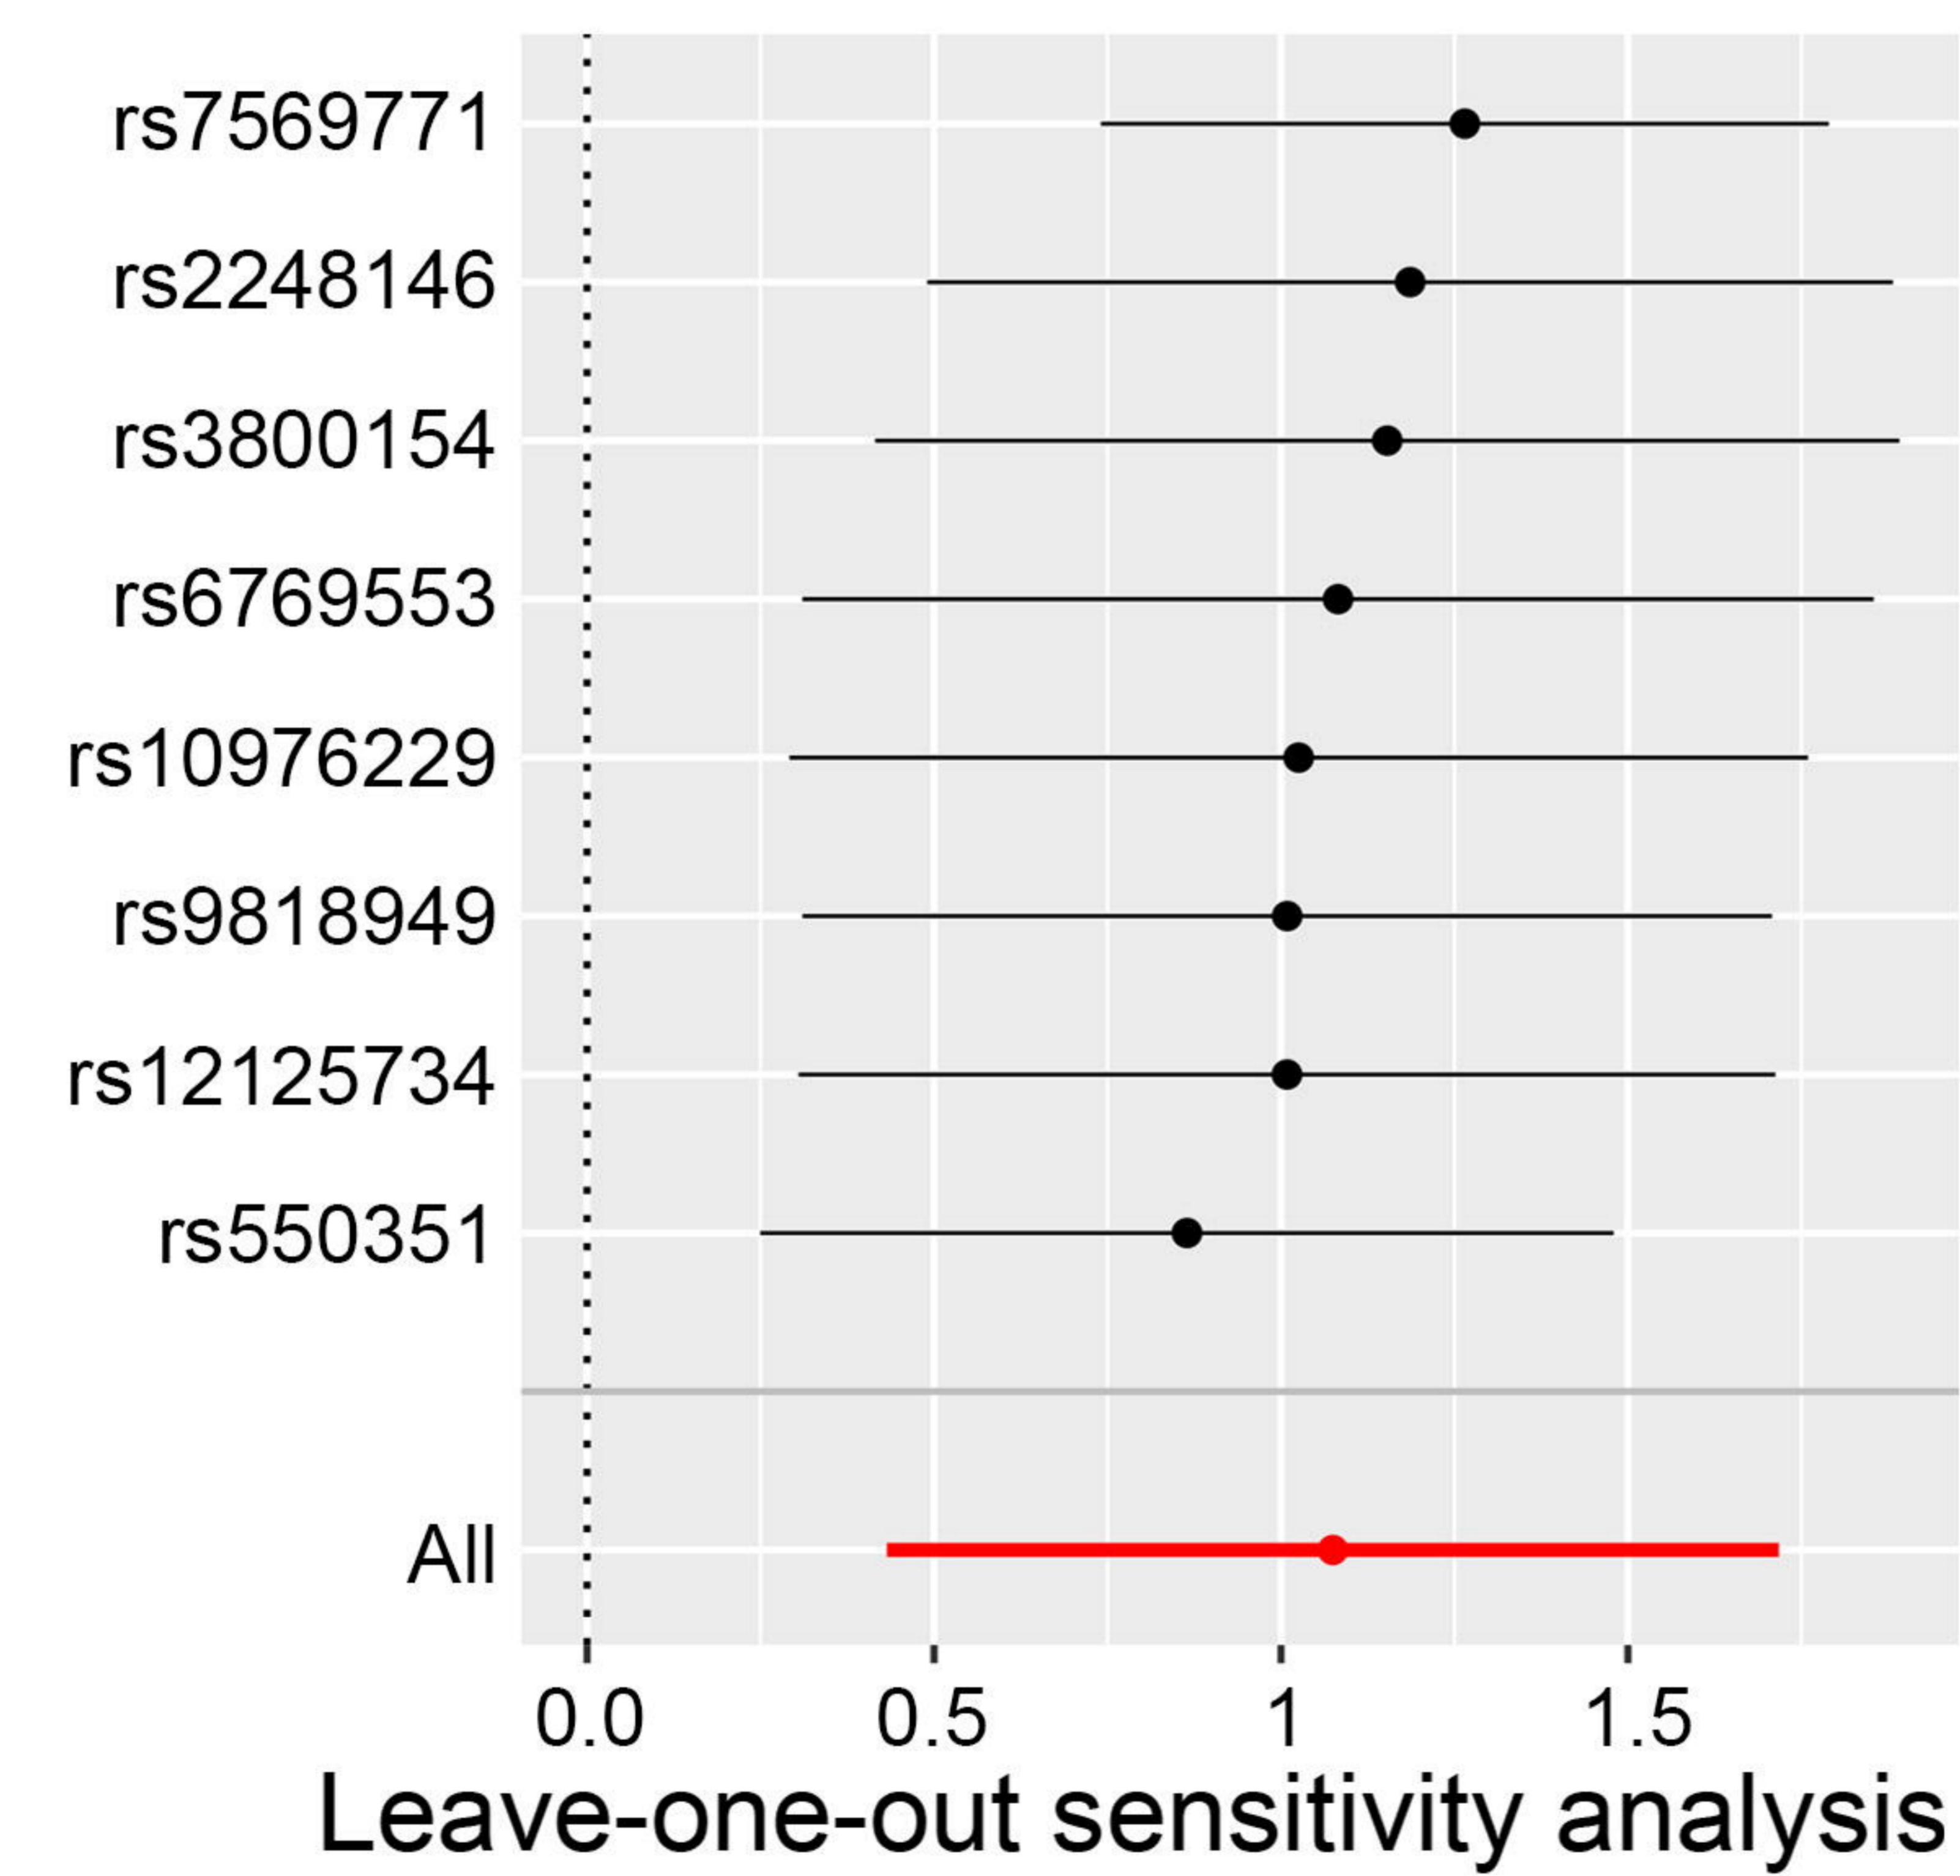

### *Defluviitaleaceae* UCG011

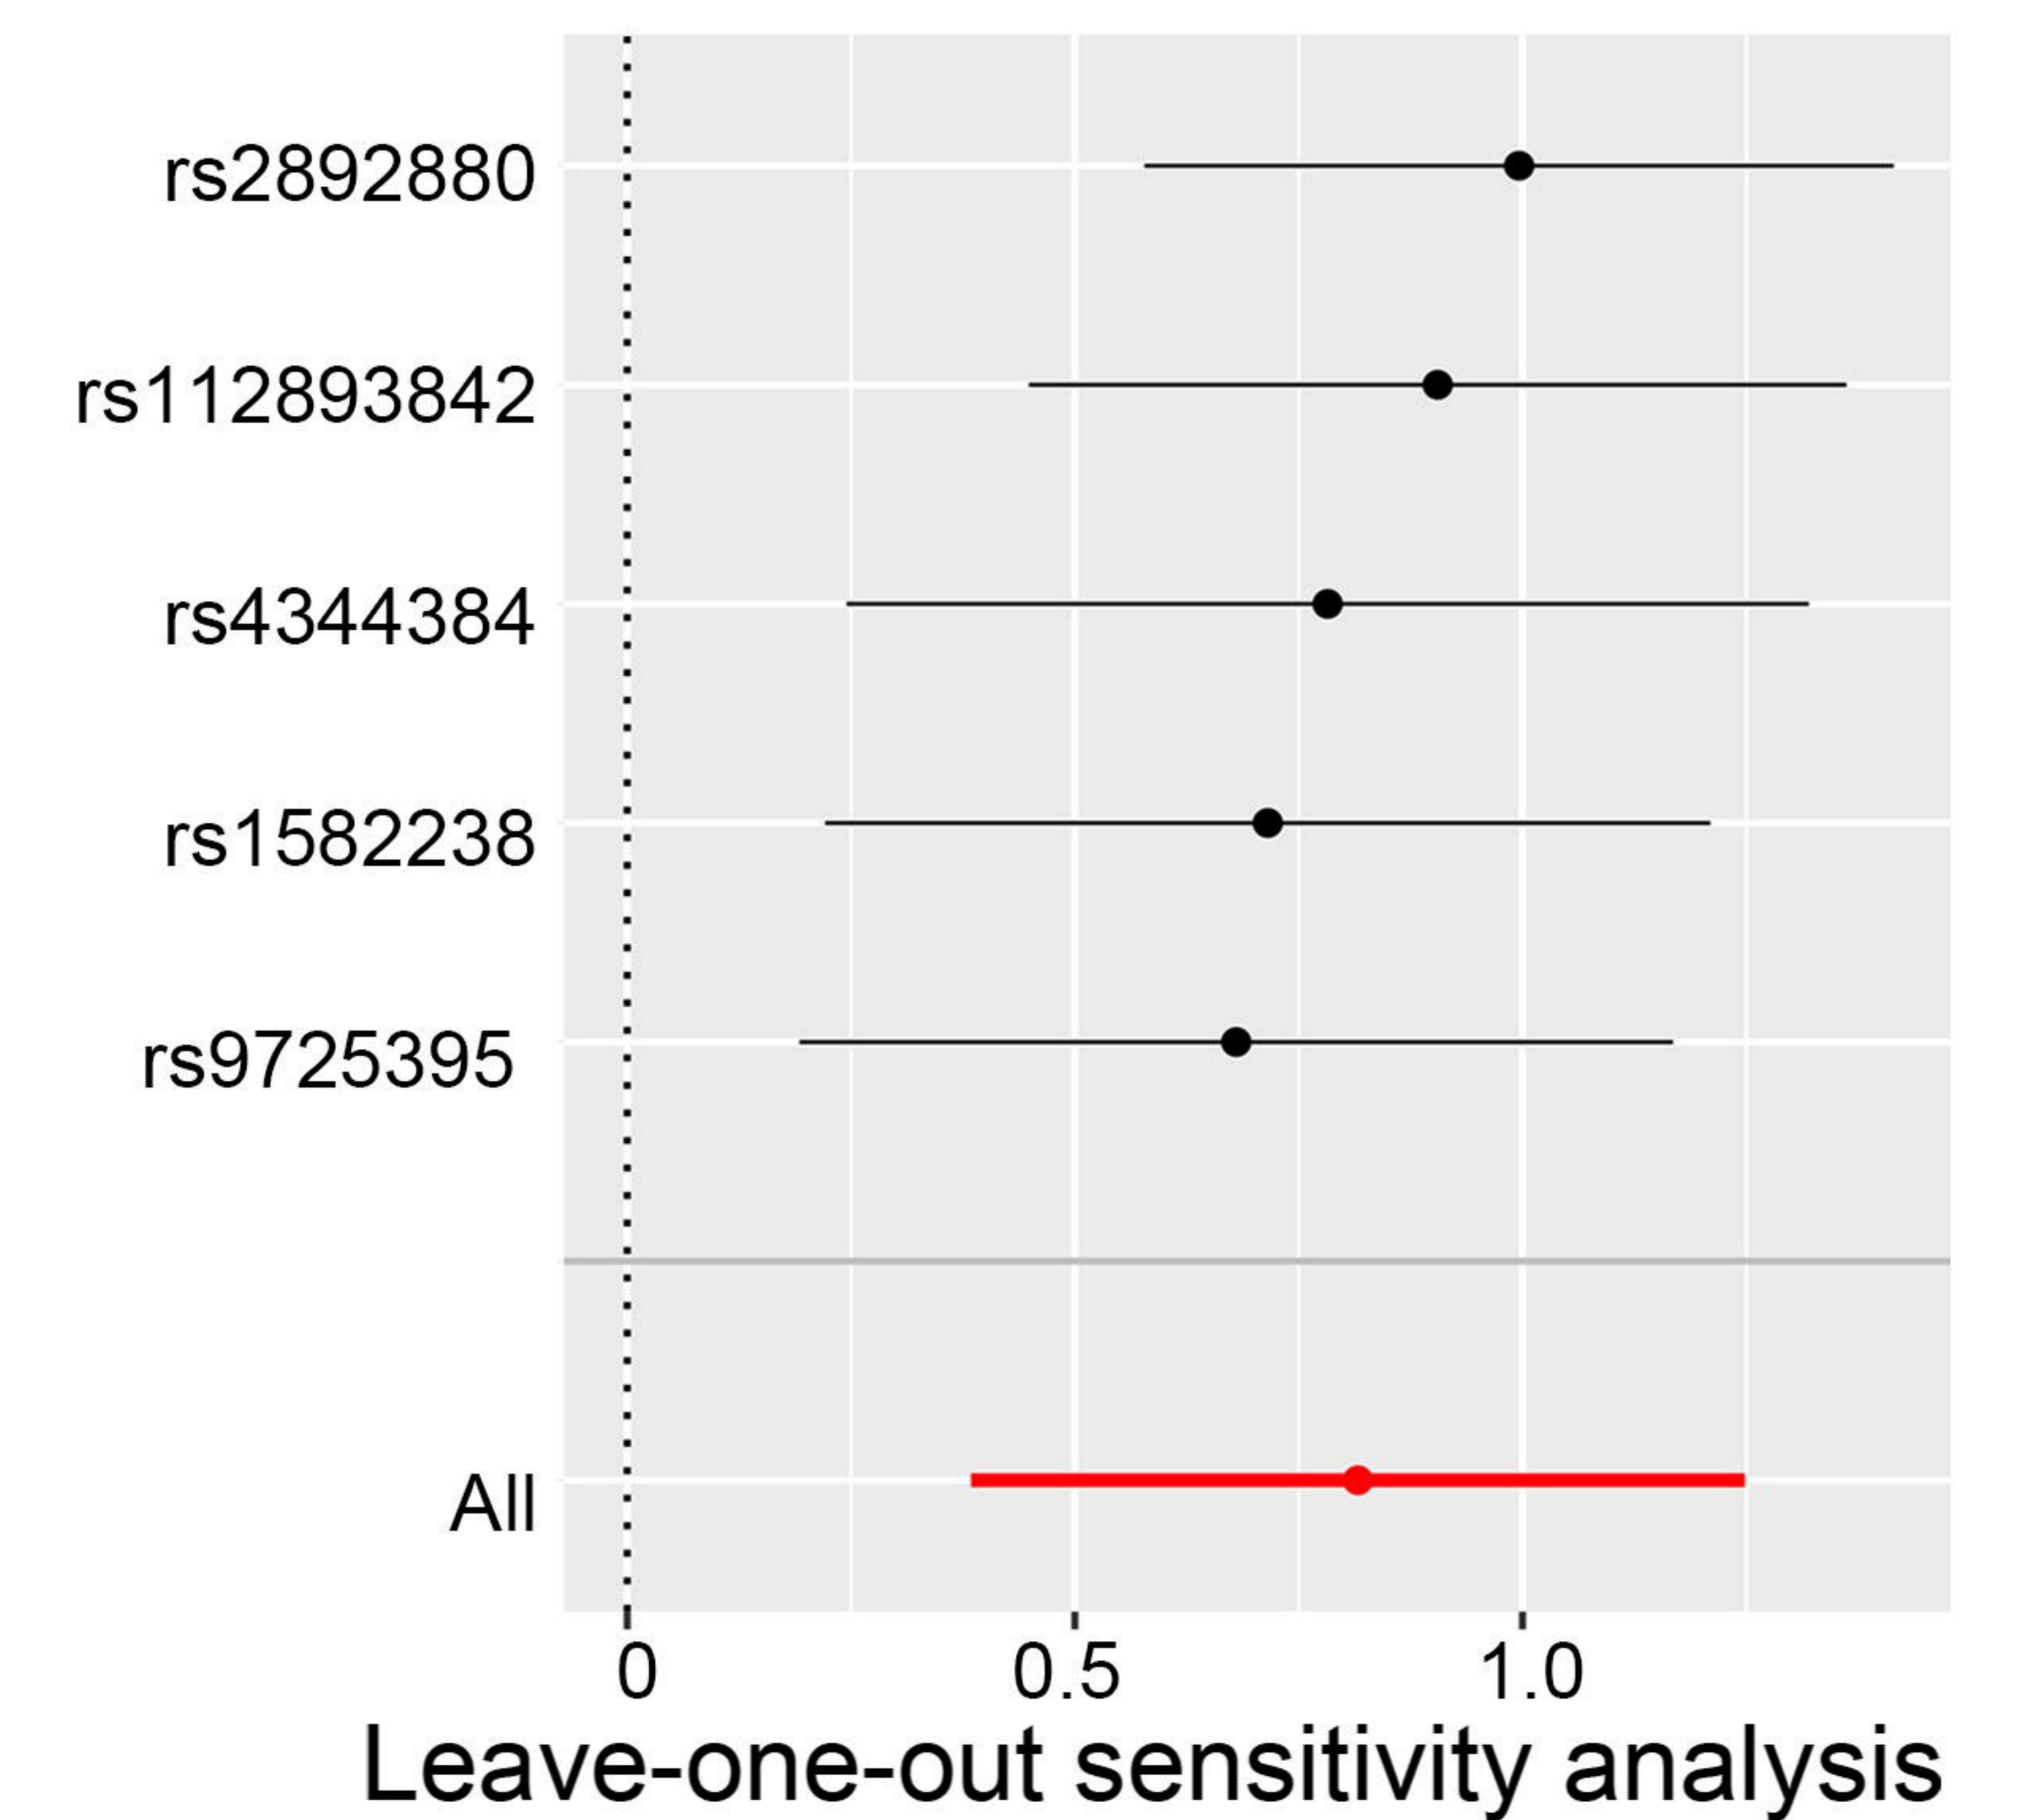

### *Eubacterium* (brachy group)

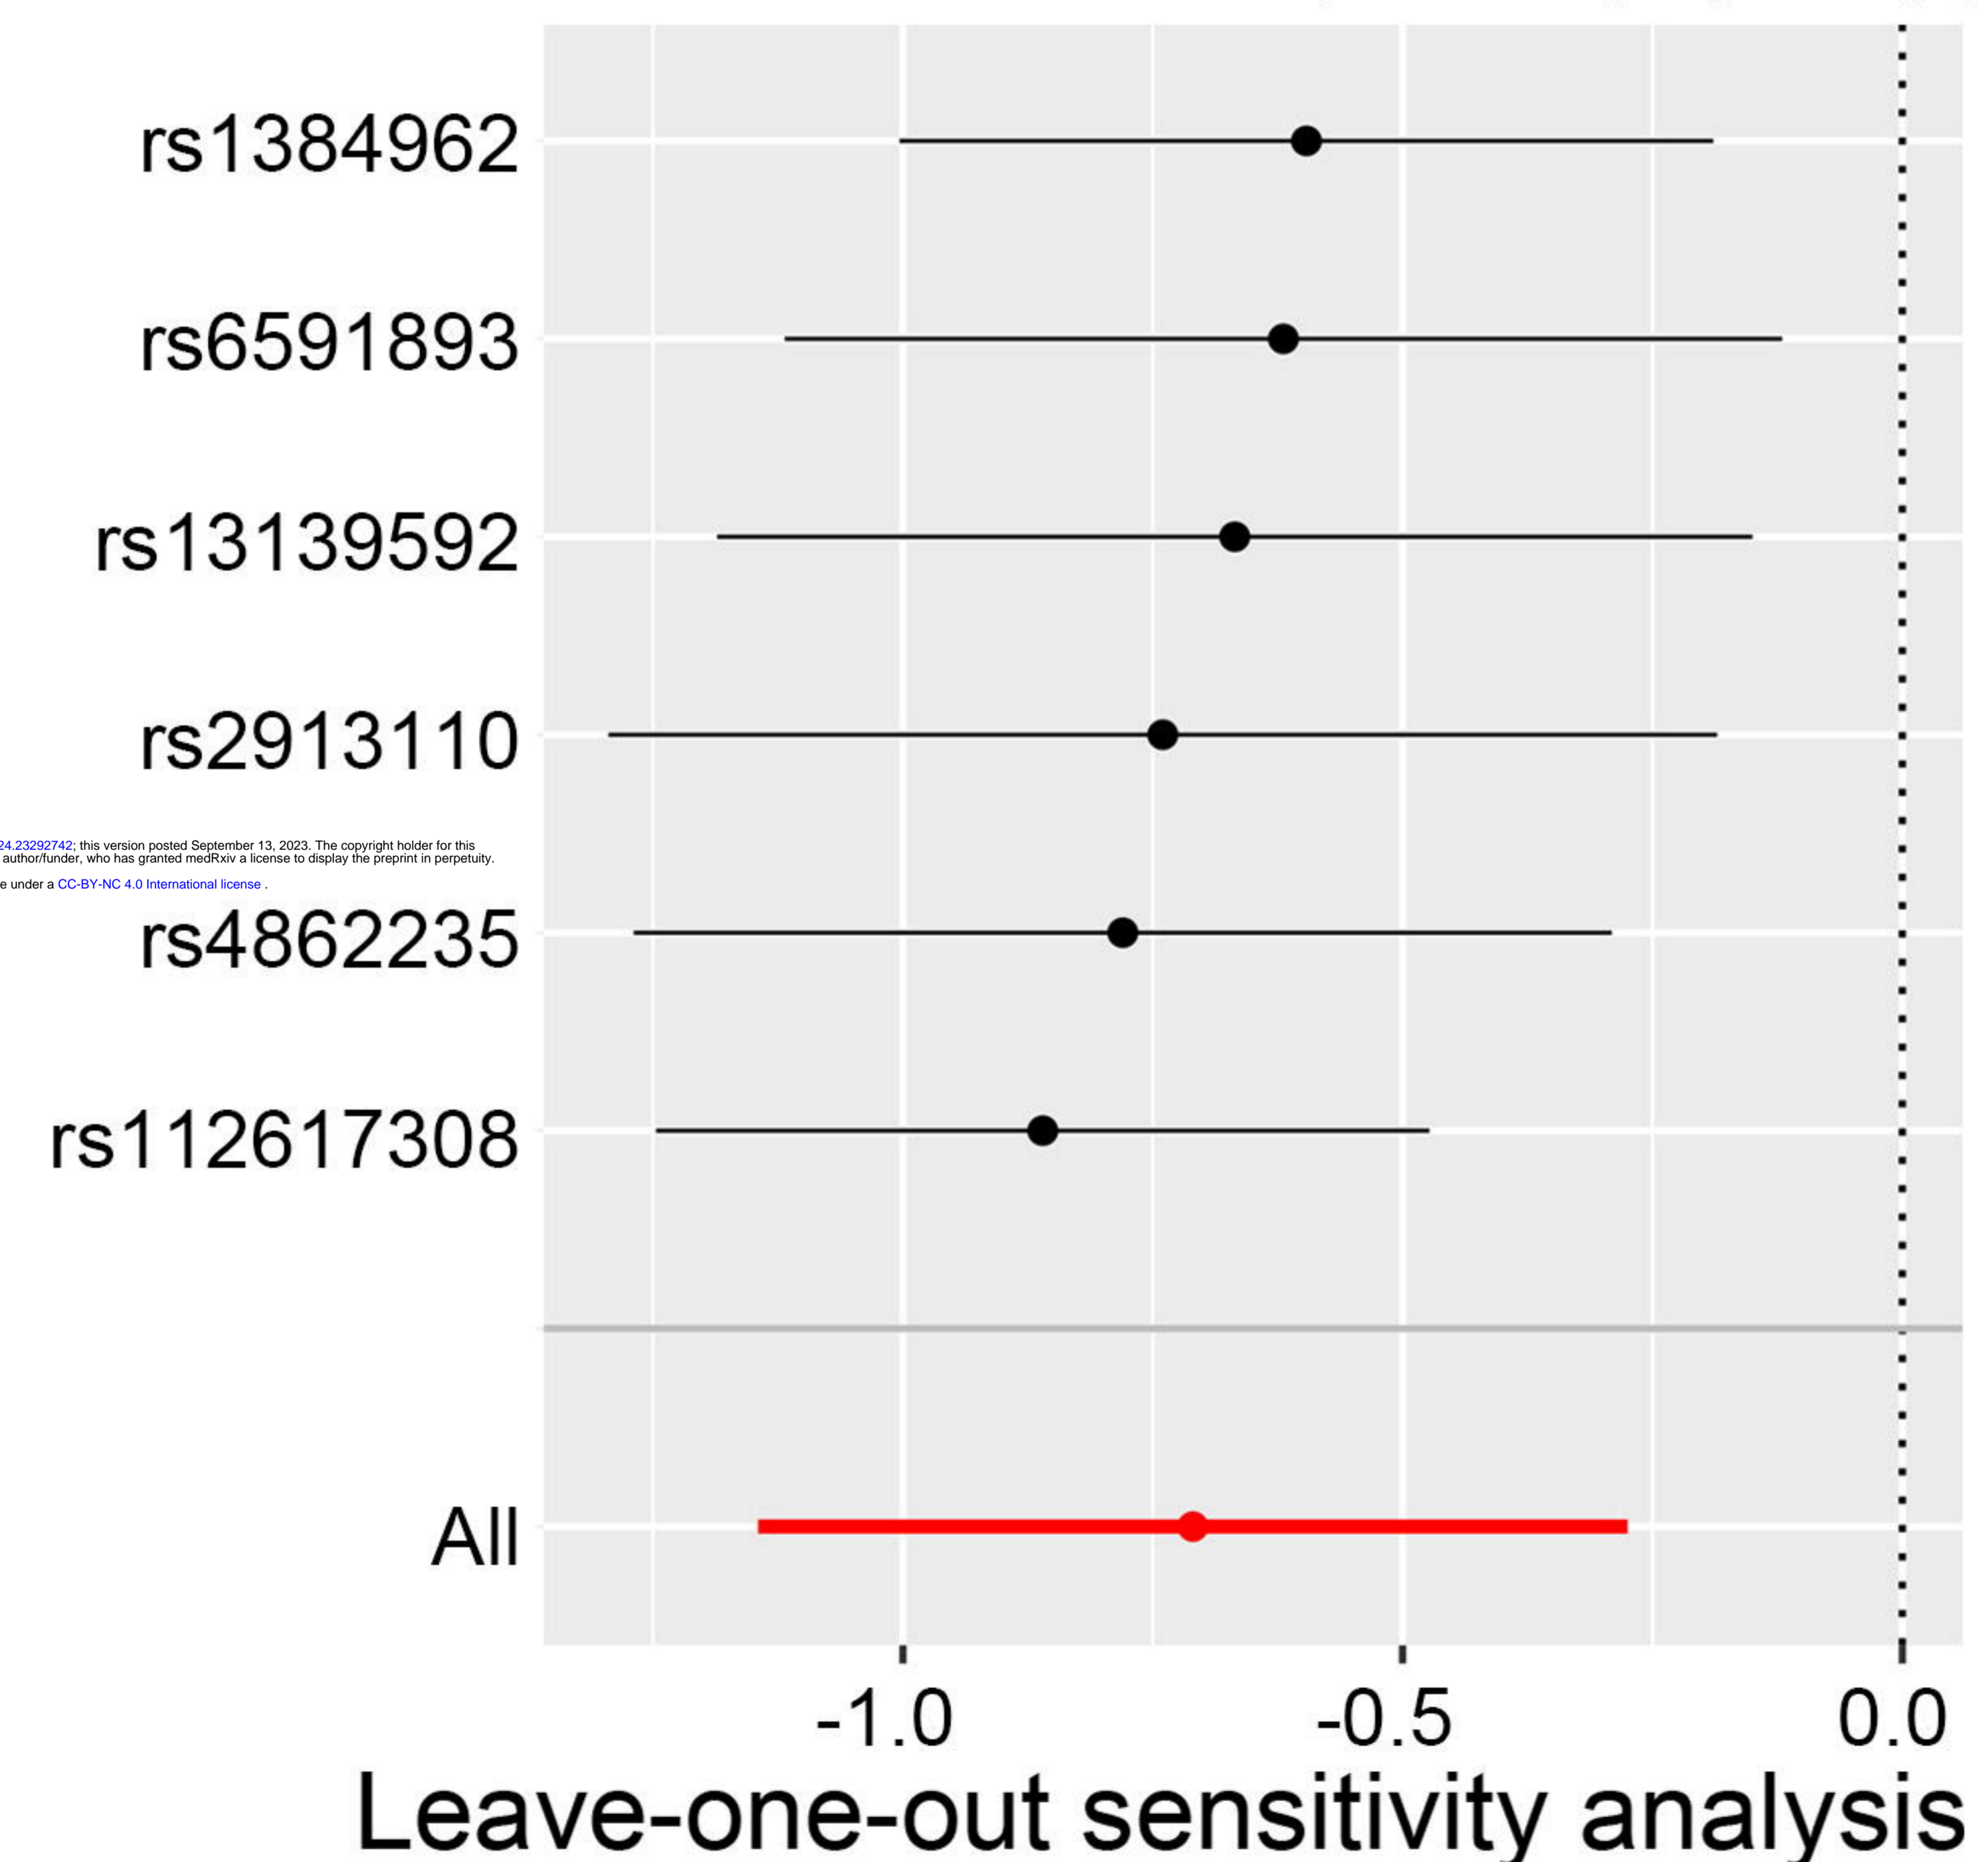

### *Peptococcus*

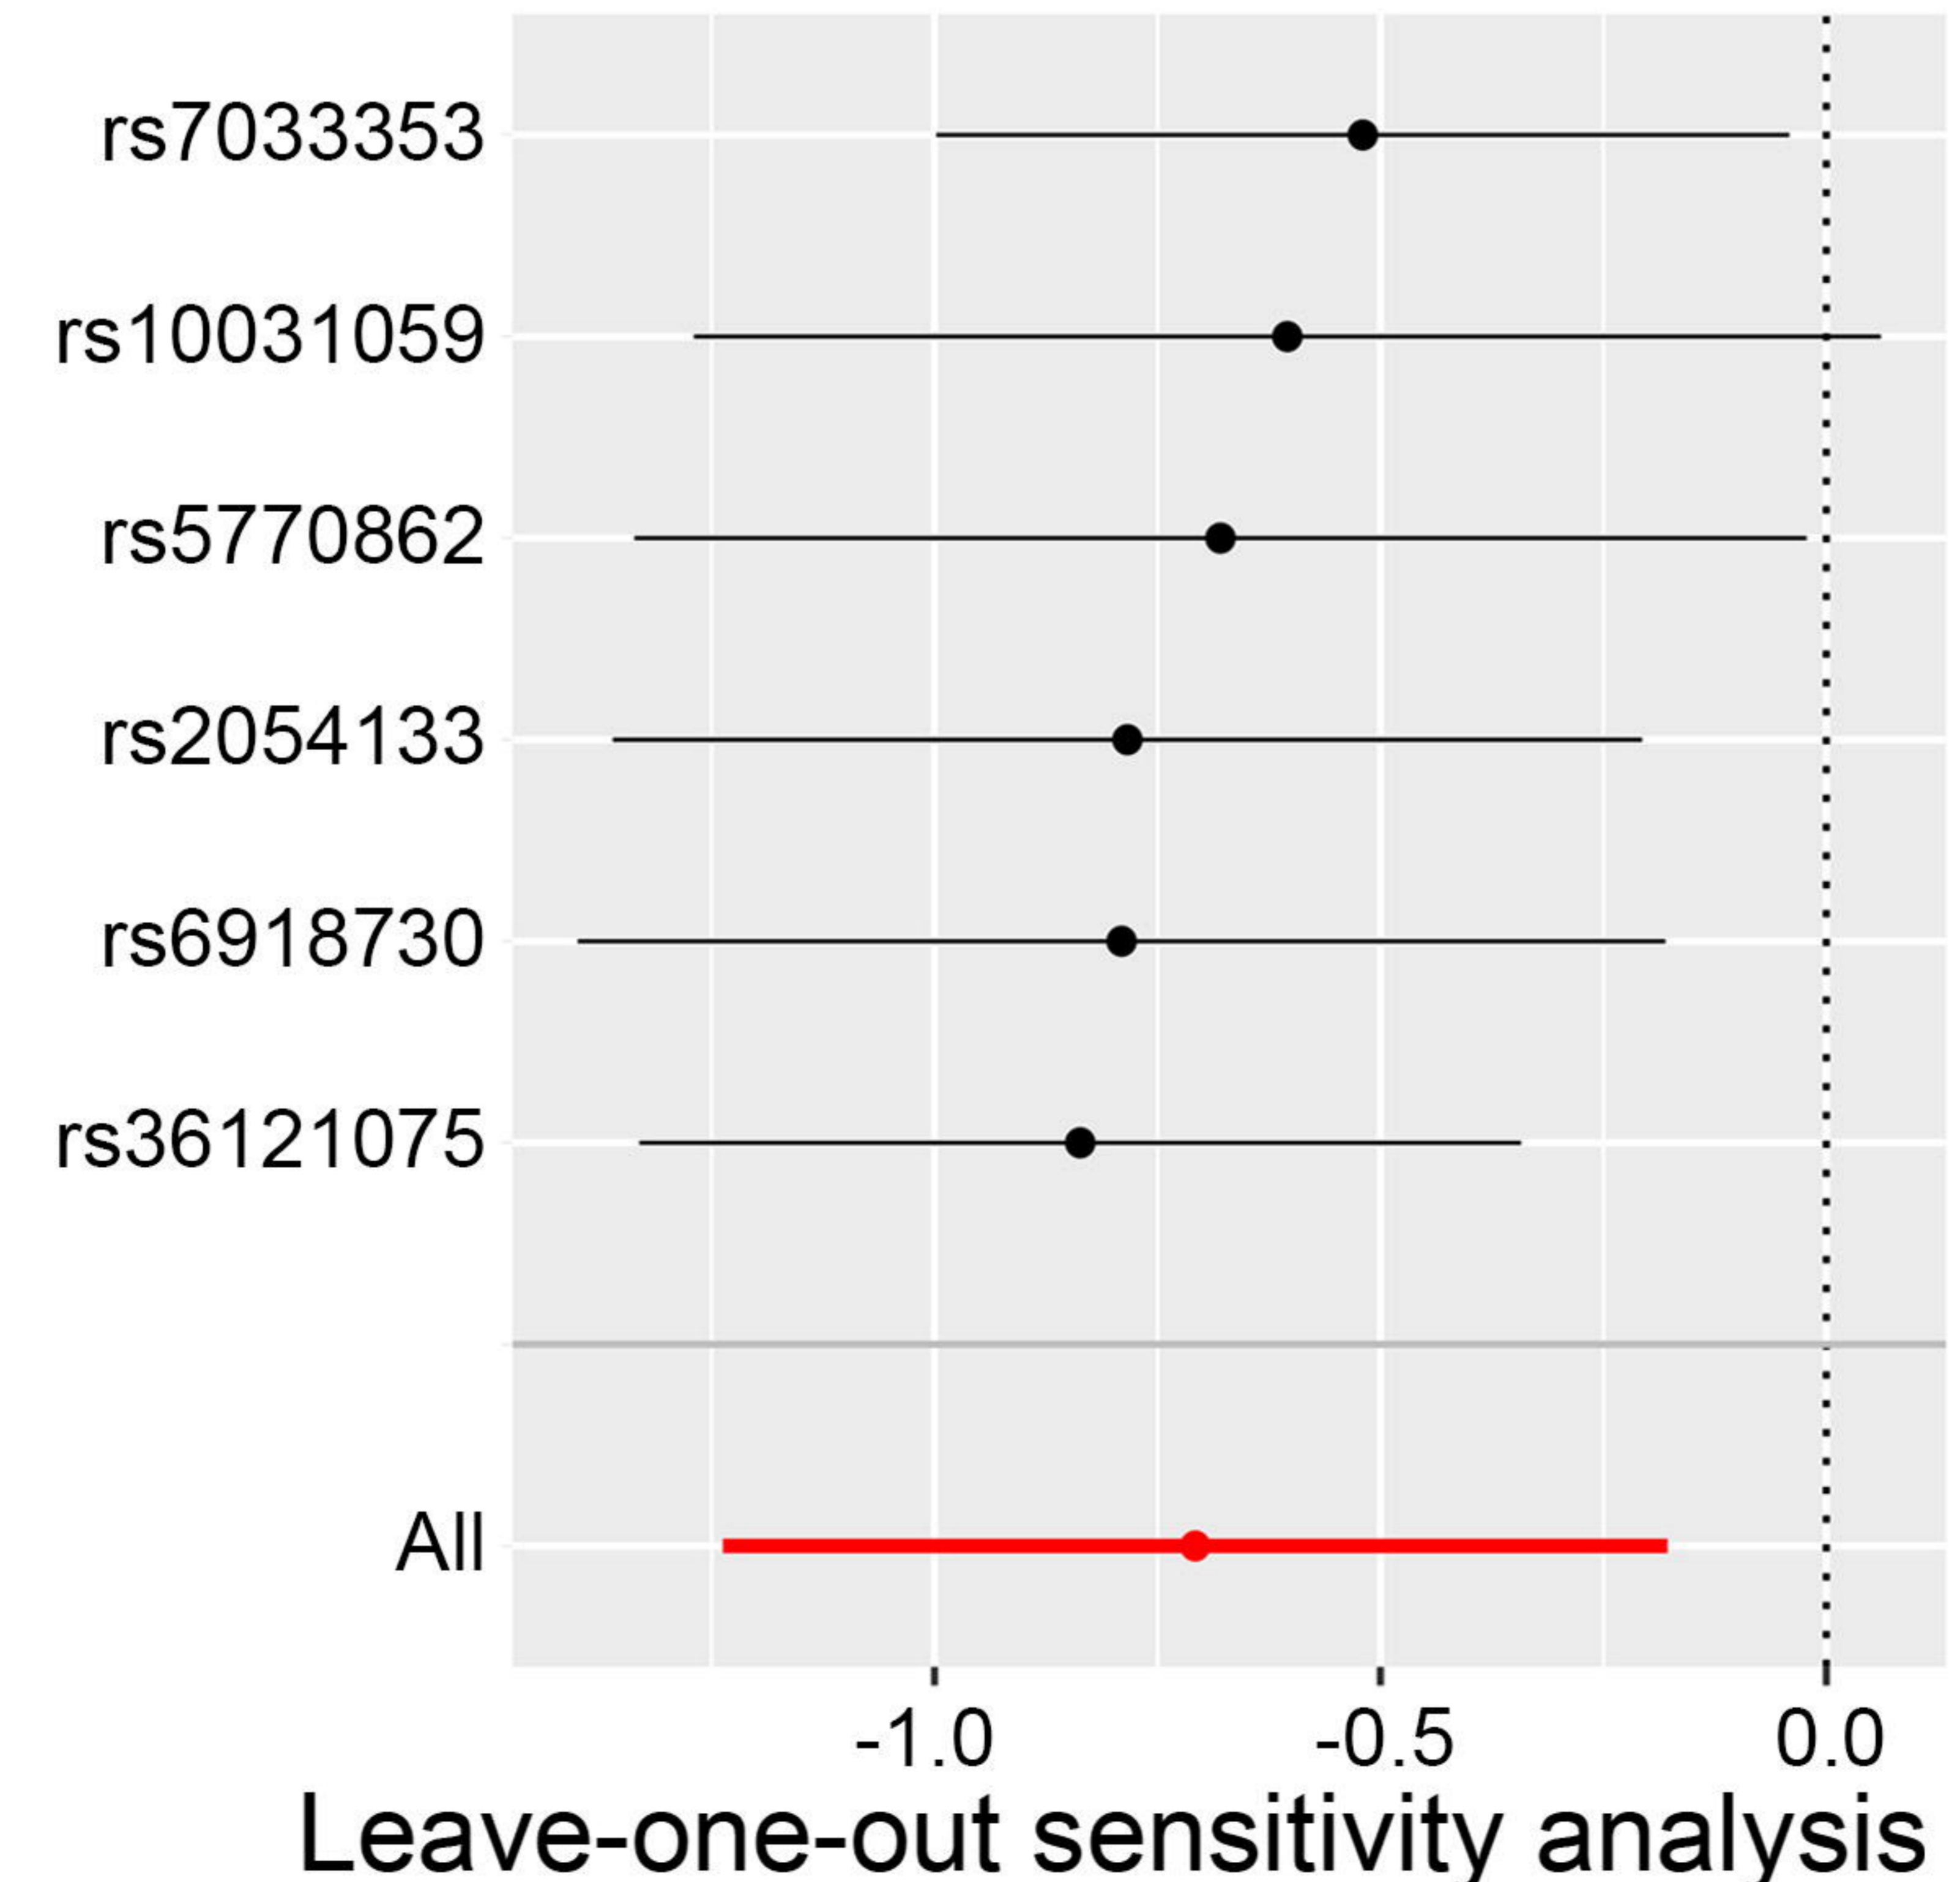

bioRxiv preprint doi: <https://doi.org/10.1101/2021.07.24.242024>; this version posted September 13, 2020. The copyright holder for this preprint (which was not certified by peer review) is the author/funder, who has granted bioRxiv a license to display the preprint in perpetuity. It is made available under aCC-BY-NC 4.0 International license.



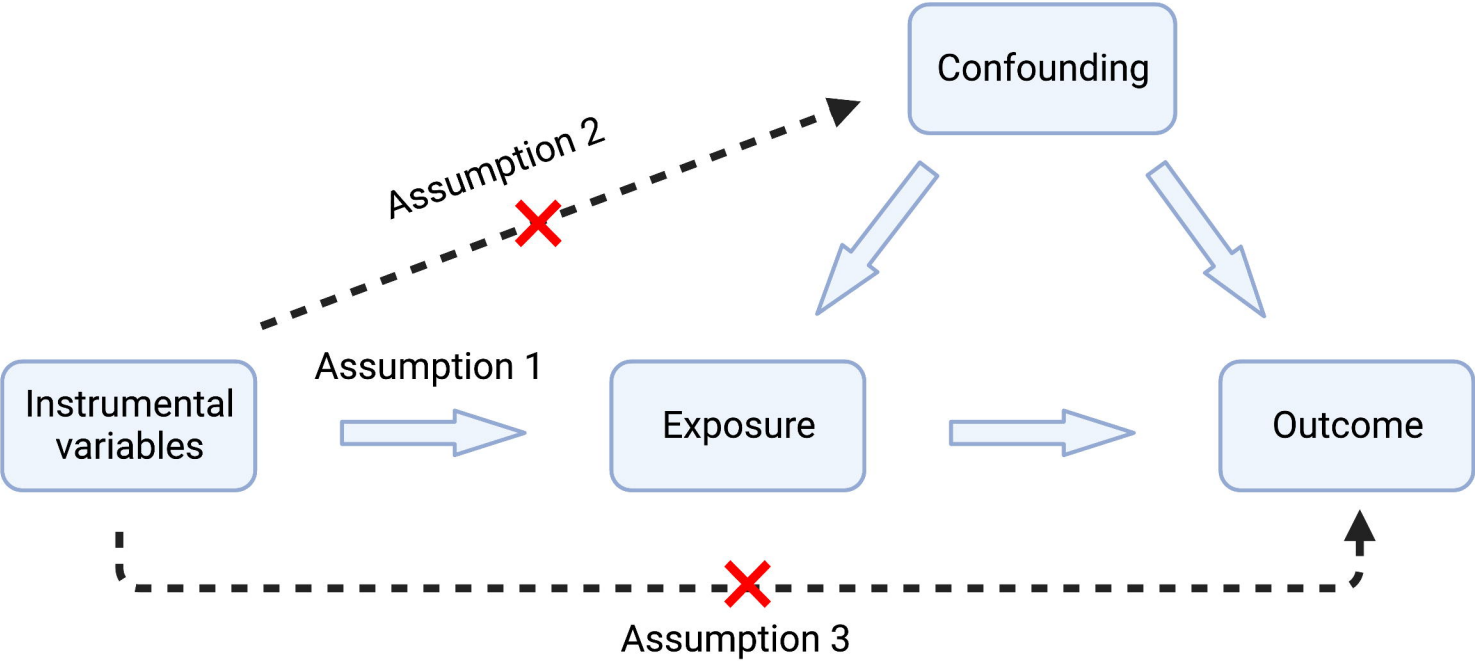

Source: https://medrxiv.org/content/10.1101/2023.07.24.23292742.full.pdf
